# Supplementary material for: Synthesis and Biological Activity of Myricetin Derivatives Containing Pyrazole Piperazine Amide
Source: MDPI journal article supplement (doi:10.3390/ijms241310442), 2023-06-21
Supplement: s1 [file s1]

# Supplementary Materials

## Synthesis and Biological Activity of Myricetin Derivatives Containing Pyrazole Piperazine Amide

Fang Liu, Xiao Cao, Tao Zhang, Li Xing, Zhiling Sun, Wei Zeng, Hui Xin and Wei Xue \*

National Key Laboratory of Green Pesticide, Key Laboratory of Green Pesticide and Agricultural Bioengineering, Ministry of Education, Center for R&D of Fine Chemicals of Guizhou University, Guiyang 550025, China; gs.liuf20@gzu.edu.cn (F.L.); gs.xcao20@gzu.edu.cn (X.C.); gs.zt21@gzu.edu.cn (T.Z.); gs.lxing21@gzu.edu.cn (L.X.); gs.zlsun22@gzu.edu.cn (Z.S.); gs.wzeng22@gzu.edu.cn (W.Z.); xinhui1135@163.com (H.X.)

\* Correspondence: wxue@gzu.edu.cn

The characterization data of the target compounds including <sup>1</sup>H NMR, <sup>13</sup>C NMR and HRMS were shown as below.

**Data for 5-chloro-1-(4-nitrophenyl)-3-phenyl-1H-pyrazole-4-carboxylic acid (b-4):** White solid, yield: 36%. m.p 213.9-214.5°C; <sup>1</sup>H NMR (400 MHz, DMSO) δ 13.17 (s, 1H, -COOH), 8.50 – 8.42 (m, 2H, Ph), 8.10 – 7.99 (m, 2H, Ph), 7.68 (dd, *J* = 6.6, 3.0 Hz, 2H, Ph), 7.48 – 7.44 (m, 3H, Ph); <sup>13</sup>C NMR (101 MHz, DMSO) δ 163.10, 153.95, 147.58, 142.35, 132.17, 131.81, 129.64, 129.40, 128.45, 127.01, 125.26, 111.96; ESI-HRMS calcd for C<sub>16</sub>H<sub>10</sub>O<sub>4</sub>N<sub>3</sub>Cl [M+H]<sup>+</sup>344.04326, found 344.04385.

**Data for tert-butyl 4-(5-chloro-1,3-diphenyl-1H-pyrazole-4-carbonyl)piperazine-1-carboxylate (c-2):** White solid, yield: 14%. m.p 59.1-60.2°C; <sup>1</sup>H NMR (400 MHz, DMSO) δ 7.71 (d, *J* = 7.5 Hz, 2H, Ph), 7.67 – 7.54 (m, 6H, Ph), 7.46 (dd, *J* = 14.0, 6.1 Hz, 2H, Ph), 3.66 (d, *J* = 30.0 Hz, 4H, piperazine), 3.15 (dd, *J* = 95.6, 60.6 Hz, 4H, piperazine), 1.39 (s, 9H, -O-C(CH<sub>3</sub>)<sub>3</sub>); <sup>13</sup>C NMR (101 MHz, DMSO) δ 162.04, 154.12, 148.98, 137.69, 131.76, 129.84, 129.59, 129.43, 128.35, 127.02, 125.82, 113.93, 79.78, 46.66, 41.70, 28.44; ESI-HRMS calcd for C<sub>25</sub>H<sub>27</sub>O<sub>3</sub>N<sub>4</sub>Cl [M+H]<sup>+</sup>467.18444, found 467.18356.

**Data for tert-butyl 4-(5-chloro-3-methyl-1-(4-nitrophenyl)-1H-pyrazole-4-carbonyl)piperazine-1-carboxylate (c-3):** White solid, yield: 86%. m.p 148.9-149.8°C; <sup>1</sup>H NMR (400 MHz, DMSO) δ 8.43 (d, *J* = 9.0 Hz, 2H, Ph), 7.96 (d, *J* = 9.0 Hz, 2H, Ph), 3.56 (d, *J* = 40.8 Hz, 5H, piperazine), 2.98 (d, *J* = 233.8 Hz, 3H, piperazine), 2.26 (s, 3H, pyrazol-CH<sub>3</sub>), 1.42 (s, 9H, -O-C(CH<sub>3</sub>)<sub>3</sub>); <sup>13</sup>C NMR (101 MHz, DMSO) δ 161.59, 154.24, 149.79, 146.91, 142.59, 125.79, 125.56, 125.27, 116.20, 79.76, 46.84, 41.83, 38.71, 28.47, 13.17; ESI-HRMS calcd for C<sub>20</sub>H<sub>24</sub>O<sub>5</sub>N<sub>5</sub>Cl [M+H]<sup>+</sup>450.15387, found 450.15274.

**Data for tert-butyl 4-(5-chloro-1-(4-nitrophenyl)-3-phenyl-1H-pyrazole-4-carbonyl)piperazine-1-carboxylate (c-4):** White solid, yield: 40%. m.p 132.1-132.5°C; <sup>1</sup>H NMR (400 MHz, DMSO) δ 8.49 – 8.44 (m, 2H, Ph), 8.09 – 8.04 (m, 2H, Ph), 7.68 (dd, *J* = 8.1, 1.3 Hz, 2H, Ph), 7.53 – 7.45 (m, 3H, Ph), 3.61 (t, *J* = 38.4 Hz, 4H, piperazine), 3.10 (dd, *J* = 150.7, 11.0 Hz, 3H, piperazine), 2.69 (s, 1H, piperazine), 1.42 (s, 9H, -O-C(CH<sub>3</sub>)<sub>3</sub>); <sup>13</sup>C NMR (101 MHz, DMSO) δ 162.04, 154.12, 148.98, 137.69, 131.76, 129.84, 129.59, 129.43, 128.35, 127.02, 125.82, 113.93, 79.78, 46.66, 41.70, 28.44; ESI-HRMS calcd for C<sub>25</sub>H<sub>27</sub>O<sub>3</sub>N<sub>4</sub>Cl [M+H]<sup>+</sup>467.18444, found 467.18356.

zine), 1.39 (s, 9H, -O-C(CH<sub>3</sub>)<sub>3</sub>); <sup>13</sup>C NMR (101 MHz, DMSO) δ 161.63, 154.12, 150.03, 147.22, 142.51, 131.31, 129.80, 129.51, 129.40, 127.11, 126.11, 125.34, 115.28, 79.80, 46.60, 41.73, 38.71, 28.44; ES I-HRMS calcd for C<sub>25</sub>H<sub>26</sub>O<sub>5</sub>N<sub>5</sub>Cl [M+H]<sup>+</sup>512.16952, found 512.16846.

**Data for tert-butyl 4-(5-chloro-1-(4-chlorophenyl)-3-methyl-1H-pyrazole-4-carbonyl)piperazine-1-carboxylate (c-5):** White solid, yield: 65%. m.p 170.5-171.5°C; <sup>1</sup>H NMR (400 MHz, DMSO) δ 7.65 (s, 4H, Ph), 3.55 (d, J = 35.1 Hz, 5H, piperazine), 3.14 (d, J = 102.2 Hz, 3H, piperazine), 2.23 (s, 3H, pyrazol-CH<sub>3</sub>), 1.41 (s, 9H, -O-C(CH<sub>3</sub>)<sub>3</sub>); <sup>13</sup>C NMR (101 MHz, DMSO) δ 161.92, 154.24, 151.50, 148.76, 136.57, 133.64, 129.76, 127.36, 115.00, 79.75, 46.86, 41.86, 28.47, 13.15; ESI-HRMS calcd for C<sub>20</sub>H<sub>25</sub>O<sub>3</sub>N<sub>4</sub>Cl<sub>2</sub> [M+H]<sup>+</sup>439.12982, found 439.12888.

**Data for tert-butyl 4-(5-chloro-1-(4-chlorophenyl)-3-phenyl-1H-pyrazole-4-carbonyl)piperazine-1-carboxylate (c-6):** White solid, yield: 78%. m.p 161.2-162.5°C; <sup>1</sup>H NMR (400 MHz, DMSO) δ 7.77 (d, J = 8.8 Hz, 2H, Ph), 7.75 – 7.67 (m, 3H, Ph), 7.65 (d, J = 6.9 Hz, 2H, Ph), 7.49 – 7.45 (m, 2H, Ph), 3.75 – 3.40 (m, 4H, piperazine), 3.15 (dd, J = 93.8, 61.0 Hz, 4H, piperazine), 1.39 (s, 9H, -O-C(CH<sub>3</sub>)<sub>3</sub>); <sup>13</sup>C NMR (101 MHz, DMSO) δ 161.90, 154.12, 149.24, 136.51, 134.04, 131.62, 129.87, 129.54, 129.44, 127.53, 127.04, 114.20, 79.79, 46.63, 41.71, 28.44; ESI-HRMS calcd for C<sub>25</sub>H<sub>26</sub>O<sub>3</sub>N<sub>4</sub>Cl<sub>2</sub> [M+H]<sup>+</sup>501.14547, found 501.14438.

**Data for tert-butyl 4-(5-chloro-3-methyl-1-(pyridin-2-yl)-1H-pyrazole-4-carbonyl)piperazine-1-carboxylate (c-7):** White solid, yield: 29%. m.p 124.3-125.1°C; <sup>1</sup>H NMR (400 MHz, DMSO) δ 8.58 (dd, J = 4.8, 1.0 Hz, 1H, Pyridine-6-H), 8.07 (td, J = 8.0, 1.8 Hz, Pyridine-4-H), 7.75 (d, J = 8.2 Hz, 1H, Pyridine-3-H), 7.53 (dd, J = 7.1, 5.1 Hz, 1H, Pyridine-5-H), 3.54 (d, J = 53.8 Hz, 4H, piperazine), 3.36 – 2.67 (m, 4H, piperazine), 2.24 (s, 3H, pyrazol-CH<sub>3</sub>), 1.41 (s, 9H, -O-C(CH<sub>3</sub>)<sub>3</sub>); <sup>13</sup>C NMR (101 MHz, DMSO) δ 161.78, 154.23, 150.89, 148.82 (d, J = 12.1 Hz), 139.94, 125.18, 124.25, 118.89, 116.12, 79.75, 46.90, 41.79, 38.71, 28.47, 13.17; <sup>13</sup>C NMR (101 MHz, DMSO) δ 161.78, 154.23, 150.89, 148.88, 148.76, 139.94, 125.18, 124.25, 118.89, 116.12, 79.75, 46.90, 41.79, 38.71, 28.47, 13.17; ESI-HRMS calcd for C<sub>19</sub>H<sub>24</sub>O<sub>3</sub>N<sub>5</sub>Cl [M+H]<sup>+</sup>406.16404, found 406.16251.

**Data for tert-butyl 4-(5-chloro-3-phenyl-1-(pyridin-2-yl)-1H-pyrazole-4-carbonyl)piperazine-1-carboxylate (c-8):** White solid, yield: 51%. m.p 45.1-46.2°C; <sup>1</sup>H NMR (400 MHz, DMSO) δ 8.64 (dd, J = 4.8, 1.1 Hz, 1H, Pyridine-6-H), 8.13 (td, J = 7.9, 1.9 Hz, 1H, Pyridine-4-H), 7.90 (d, J = 8.1 Hz, 1H, Pyridine-3-H), 7.68 (d, J = 6.9 Hz, 2H, Ph), 7.59 (dd, J = 7.1, 5.3 Hz, 1H, Pyridine-5-H), 7.48 (dq, J = 14.3, 7.1 Hz, 3H, Ph), 3.76 – 3.40 (m, 3H, piperazine), 3.34 (s, 1H, piperazine), 3.27 (s, 1H, piperazine), 2.86 (s, 1H, piperazine), 2.69 (s, 2H, piperazine), 1.39 (s, 9H, -O-C(CH<sub>3</sub>)<sub>3</sub>); <sup>13</sup>C NMR (101 MHz, DMSO) δ 161.81, 154.10, 150.85, 149.29, 148.89, 140.13, 131.46, 129.70, 129.48, 127.08, 126.24, 124.66, 119.21, 115.22, 79.79, 46.64, 41.69, 38.71, 28.43; ESI-HRMS calcd for C<sub>24</sub>H<sub>26</sub>O<sub>3</sub>N<sub>5</sub>Cl [M+H]<sup>+</sup>468.17969, found 468.17868.

**Data for tert-butyl 4-(5-chloro-1-(4-methoxyphenyl)-3-methyl-1H-pyrazole-4-carbonyl)piperazine-1-carboxylate (c-9):** White solid, yield: 52%. m.p 122.8-123.2°C; <sup>1</sup>H NMR (400 MHz, DMSO) δ 7.49 (d, J = 8.9 Hz, 2H, Ph), 7.09 (d, J = 8.9 Hz, 2H, Ph), 3.83 (s, 3H, -OCH<sub>3</sub>), 3.57 (t, J = 29.6 Hz, 6H, piperazine), 2.98 (d, J = 235.8 Hz, 2H, piperazine), 2.21 (s, 3H, pyrazol-CH<sub>3</sub>), 1.41 (s, 9H, -O-C(CH<sub>3</sub>)<sub>3</sub>); <sup>13</sup>C NMR (101 MHz, DMSO) δ 162.19, 159.74, 154.24, 147.97, 130.68, 127.35, 125.29, 114.75, 114.17,

79.74, 55.98, 38.71, 28.47, 13.17; ESI-HRMS calcd for C<sub>21</sub>H<sub>27</sub>O<sub>4</sub>N<sub>4</sub>Cl [M+H]<sup>+</sup>435.17936, found 435.17841.

**Data for tert-butyl 4-(5-chloro-1,3-dimethyl-1H-pyrazole-4-carbonyl)piperazine-1-carboxylate (c-10):** White solid, yield: 54%. m.p 118.4-119.0°C; <sup>1</sup>H NMR (400 MHz, DMSO) δ 3.73 (s, 3H, pyrazol-N-CH<sub>3</sub>), 3.54 (d, J = 11.6 Hz, 3H, piperazine), 3.34 (s, 3H, piperazine), 2.69 (s, 2H, piperazine), 2.12 (s, 3H, pyrazol-CH<sub>3</sub>), 1.41 (s, 9H, -O-C(CH<sub>3</sub>)<sub>3</sub>); <sup>13</sup>C NMR (101 MHz, DMSO) δ 162.51, 154.23, 146.46, 125.32, 112.67, 79.72, 38.71, 36.42, 28.47, 13.09; ESI-HRMS calcd for C<sub>15</sub>H<sub>23</sub>O<sub>3</sub>N<sub>4</sub>Cl [M+H]<sup>+</sup>343.15314, found 343.15244.

**Data for 3-(3-(4-(5-chloro-3-methyl-1-phenyl-1H-pyrazole-4-carbonyl)piperazin-1-yl)propoxy)-5,7-dimethoxy-2-(3,4,5-trimethoxyphenyl)-4H-chromen-4-one (D1):** White solid, yield: 46%. m.p. 181.2-181.6°C; <sup>1</sup>H NMR (400 MHz, DMSO) δ 7.61 – 7.56 (m, 4H, Ph-H), 7.52 (d, J = 2.9 Hz, 1H, Ph-H), 7.36 (s, 2H, Ph-H), 6.84 (d, J = 2.2 Hz, 1H, Ph-H), 6.50 (d, J = 2.2 Hz, 1H, Ph-H), 3.99 (t, J = 6.1 Hz, 2H, -O-CH<sub>2</sub>-CH<sub>2</sub>-CH<sub>2</sub>-N), 3.90 (s, 3H, Ph-OCH<sub>3</sub>), 3.86 (d, J = 12.3 Hz, 9H, Ph-OCH<sub>3</sub>), 3.74 (s, 3H, Ph-OCH<sub>3</sub>), 3.49 (d, J = 60.6 Hz, 4H, piperazine), 2.39 – 2.34 (m, 2H, -O-CH<sub>2</sub>-CH<sub>2</sub>-CH<sub>2</sub>-N), 2.30 (s, 4H, piperazine), 2.21 (s, 3H, pyrazol-CH<sub>3</sub>), 1.83 – 1.76 (m, 2H, -O-CH<sub>2</sub>-CH<sub>2</sub>-CH<sub>2</sub>-N); <sup>13</sup>C NMR (101 MHz, DMSO) δ 172.67, 164.21, 161.67, 160.74, 158.65, 153.15, 152.10, 148.18, 140.43, 139.80, 137.77, 129.73, 129.19, 126.11, 125.65, 124.93, 115.00, 108.92, 106.29, 96.40, 93.56, 70.69, 60.65, 56.57, 56.52, 54.88, 53.83, 52.88, 47.10, 41.87, 27.63, 13.14; ESI-HRMS calcd for C<sub>38</sub>H<sub>42</sub>O<sub>9</sub>N<sub>4</sub>Cl [M+H]<sup>+</sup>733.26348, found 733.26440.

**Data for 3-(3-(4-(5-chloro-1,3-diphenyl-1H-pyrazole-4-carbonyl)piperazin-1-yl)propoxy)-5,7-dimethoxy-2-(3,4,5-trimethoxyphenyl)-4H-chromen-4-one (D2):** White solid, yield: 9%. m.p. 99.9-101.1°C; <sup>1</sup>H NMR (400 MHz, DMSO) δ 7.72 – 7.69 (m, 2H, Ph-H), 7.62 (ddd, J = 25.5, 12.1, 4.4 Hz, 5H, Ph-H), 7.50 – 7.41 (m, 3H, Ph-H), 7.34 (s, 2H, Ph-H), 6.84 (d, J = 2.2 Hz, 1H, Ph-H), 6.49 (d, J = 2.2 Hz, 1H, Ph-H), 3.95 (t, J = 6.1 Hz, 2H, -O-CH<sub>2</sub>-CH<sub>2</sub>-CH<sub>2</sub>-N), 3.90 (s, 3H, Ph-OCH<sub>3</sub>), 3.85 (d, J = 6.9 Hz, 9H, Ph-OCH<sub>3</sub>), 3.73 (s, 3H, Ph-OCH<sub>3</sub>), 3.62 (d, J = 59.6 Hz, 2H, piperazine), 3.25 (d, J = 27.4 Hz, 2H, piperazine), 2.34 (s, 1H, piperazine), 2.31 – 2.27 (m, 2H, -O-CH<sub>2</sub>-CH<sub>2</sub>-CH<sub>2</sub>-N), 2.18 (s, 2H, piperazine), 1.85 (s, 1H, piperazine), 1.75 (dd, J = 13.5, 6.5 Hz, 2H, -O-CH<sub>2</sub>-CH<sub>2</sub>-CH<sub>2</sub>-N); <sup>13</sup>C NMR (101 MHz, DMSO) δ 172.65, 164.21, 161.70, 160.74, 158.64, 153.14, 152.09, 148.80, 140.39, 139.79, 137.71, 131.80, 129.84, 129.56, 129.37, 126.92, 126.09, 125.99, 125.81, 114.20, 108.91, 106.26, 96.39, 93.56, 70.61, 60.65, 56.56, 54.81, 53.18, 52.53, 46.85, 41.83, 27.53; ESI-HRMS calcd for C<sub>43</sub>H<sub>44</sub>O<sub>9</sub>N<sub>4</sub>Cl [M+H]<sup>+</sup>795.27913, found 795.27673.

**Data for 3-(3-(4-(5-chloro-3-methyl-1-(4-nitrophenyl)-1H-pyrazole-4-carbonyl)piperazin-1-yl)propoxy)-5,7-dimethoxy-2-(3,4,5-trimethoxyphenyl)-4H-chromen-4-one (D3):** Yellow solid, yield: 17%. m.p. 113.8-115.2°C; <sup>1</sup>H NMR (400 MHz, DMSO) δ 8.42 (d, J = 9.1 Hz, 2H, Ph), 7.95 (d, J = 9.1 Hz, 2H, Ph), 7.36 (s, 2H, Ph), 6.84 (d, J = 2.1 Hz, 1H, Ph), 6.50 (d, J = 2.1 Hz, 1H, Ph), 3.99 (t, J = 6.0 Hz, 2H, -O-CH<sub>2</sub>-CH<sub>2</sub>-CH<sub>2</sub>-N), 3.90 (s, 3H, Ph-OCH<sub>3</sub>), 3.86 (d, J = 12.7 Hz, 9H, Ph-OCH<sub>3</sub>), 3.74 (s, 3H, Ph-OCH<sub>3</sub>), 3.51 (d, J = 58.9 Hz, 4H, piperazine), 2.41 – 2.35 (m, 2H, -O-CH<sub>2</sub>-CH<sub>2</sub>-CH<sub>2</sub>-N), 2.31 (s, 4H, piperazine), 2.24 (s, 3H, pyrazol-CH<sub>3</sub>), 1.84 – 1.76 (m, 2H, -O-CH<sub>2</sub>-CH<sub>2</sub>-CH<sub>2</sub>-N); <sup>13</sup>C NMR (101 MHz, DMSO) δ 172.67, 164.22, 161.19, 160.74, 158.65, 153.15, 152.09, 149.58, 146.89, 142.60, 140.42, 139.80, 126.11, 125.74, 125.35, 125.26, 116.49, 108.92, 106.28, 96.40, 93.56, 70.74, 70.70, 60.66, 56.57, 56.52, 54.88, 53.82, 52.82, 47.08, 41.94, 27.63, 13.14; ESI-HRMS calcd for C<sub>38</sub>H<sub>41</sub>O<sub>11</sub>N<sub>5</sub>Cl [M+H]<sup>+</sup>778.24856, found 778.25000.

**Data for 3-(3-(4-(5-chloro-1-(4-nitrophenyl)-3-phenyl-1H-pyrazole-4-carbonyl)piperazin-1-yl)propoxy)-5,7-dimethoxy-2-(3,4,5-trimethoxyphenyl)-4H-chromen-4-one (D4):** White solid, yield: 26%. m.p. 150.5-152.8°C; <sup>1</sup>H NMR (400 MHz, DMSO) δ 8.55 - 8.39 (m, 2H, -Ph), 8.11 - 8.03 (m, 2H, -Ph), 7.70 - 7.63 (m, 2H, -Ph), 7.55

- 7.40 (m, 3H, -Ph), 7.34 (s, 2H, -Ph), 6.84 (d,  $J = 2.1$  Hz, 1H, -Ph), 6.49 (d,  $J = 2.2$  Hz, 1H, -Ph), 3.94 (t,  $J = 6.1$  Hz, 2H, -O-CH<sub>2</sub>-CH<sub>2</sub>-CH<sub>2</sub>-N), 3.89 (s, 3H, Ph-OCH<sub>3</sub>), 3.84 (d,  $J = 8.2$  Hz, 9H, Ph-OCH<sub>3</sub>), 3.73 (s, 3H, Ph-OCH<sub>3</sub>), 3.62 (d,  $J = 40.0$  Hz, 2H, piperazine), 3.28 (d,  $J = 35.5$  Hz, 2H, piperazine), 2.35 (s, 1H, piperazine), 2.30 (s, 2H, -O-CH<sub>2</sub>-CH<sub>2</sub>-CH<sub>2</sub>-N), 2.21 (d,  $J = 10.7$  Hz, 2H, piperazine), 1.87 (s, 1H, piperazine), 1.80 - 1.70 (m, 2H, -O-CH<sub>2</sub>-CH<sub>2</sub>-CH<sub>2</sub>-N); <sup>13</sup>C NMR (101 MHz, DMSO)  $\delta$  172.69, 164.23, 161.29, 160.71, 158.64, 153.13, 152.10, 149.89, 147.18, 142.51, 140.36, 139.75, 131.31, 129.77, 129.47, 127.02, 126.44, 126.07, 125.33, 115.51, 108.87, 106.19, 96.38, 93.54, 70.59, 60.65, 56.53, 54.81, 53.20, 52.50, 46.81, 41.83, 27.63; ESI-HRMS calcd for C<sub>43</sub>H<sub>43</sub>O<sub>11</sub>N<sub>5</sub>Cl [M+H]<sup>+</sup>840.26421, found 840.26147.

**Data for** 3-(3-(4-(5-chloro-1-(4-chlorophenyl)-3-methyl-1H-pyrazole-4-carbonyl)piperazin-1-yl)propoxy)-5,7-dimethoxy-2-(3,4,5-trimethoxyphenyl)-4H-chromen-4-one (**D5**): White solid, yield: 4 %. m.p. 165.7-166.5 °C; <sup>1</sup>H NMR (400 MHz, DMSO)  $\delta$  7.64 (s, 4H, Ph-H), 7.36 (s, 2H, Ph-H), 6.84 (d,  $J = 2.2$  Hz, 1H, Ph-H), 6.50 (d,  $J = 2.2$  Hz, 1H, Ph-H), 3.99 (t,  $J = 6.1$  Hz, 2H, -O-CH<sub>2</sub>-CH<sub>2</sub>-CH<sub>2</sub>-N), 3.90 (s, 3H, Ph-OCH<sub>3</sub>), 3.86 (d,  $J = 12.2$  Hz, 9H, Ph-OCH<sub>3</sub>), 3.74 (s, 3H, Ph-OCH<sub>3</sub>), 3.49 (d,  $J = 53.9$  Hz, 4H, piperazine), 2.43 - 2.34 (m, 2H, -O-CH<sub>2</sub>-CH<sub>2</sub>-CH<sub>2</sub>-N), 2.30 (s, 4H, piperazine), 2.21 (s, 3H, pyrazol-CH<sub>3</sub>), 1.85 - 1.72 (m, 2H, -O-CH<sub>2</sub>-CH<sub>2</sub>-CH<sub>2</sub>-N); <sup>13</sup>C NMR (101 MHz, DMSO)  $\delta$  172.67, 164.21, 161.52, 160.74, 158.65, 153.15, 152.10, 148.53, 140.43, 139.80, 136.59, 133.61, 129.76, 127.33, 126.11, 125.08, 115.29, 108.92, 106.29, 96.40, 93.56, 70.70, 60.65, 56.57, 56.52, 54.88, 53.87, 52.94, 47.02, 41.93, 27.63, 13.12; ESI-HRMS calcd for C<sub>38</sub>H<sub>41</sub>O<sub>9</sub>N<sub>4</sub>Cl<sub>2</sub> [M+H]<sup>+</sup>767.22451, found 767.22571.

**Data for** 3-(3-(4-(5-chloro-1-(4-chlorophenyl)-3-phenyl-1H-pyrazole-4-carbonyl)piperazin-1-yl)propoxy)-5,7-dimethoxy-2-(3,4,5-trimethoxyphenyl)-4H-chromen-4-one (**D6**): White solid, yield: 29%. m.p 126.7-128.2°C; <sup>1</sup>H NMR (400 MHz, DMSO)  $\delta$  7.76 (d,  $J = 8.7$  Hz, 2H, Ph), 7.70 - 7.65 (m, 4H, Ph), 7.49 - 7.44 (m, 3H, Ph), 7.34 (s, 2H, Ph), 6.84 (d,  $J = 2.1$  Hz, 1H, Ph), 6.50 (d,  $J = 2.1$  Hz, 1H, Ph), 3.95 (t,  $J = 6.1$  Hz, 2H, -O-CH<sub>2</sub>-CH<sub>2</sub>-CH<sub>2</sub>-N), 3.90 (s, 3H, Ph-OCH<sub>3</sub>), 3.86 - 3.77 (m, 9H, Ph-OCH<sub>3</sub>), 3.73 (s, 3H, Ph-OCH<sub>3</sub>), 3.60 (d,  $J = 58.6$  Hz, 2H, piperazine), 3.20 (s, 2H, piperazine), 2.33 (s, 1H, piperazine), 2.31 - 2.27 (m, 2H, -O-CH<sub>2</sub>-CH<sub>2</sub>-CH<sub>2</sub>-N), 2.12 (d,  $J = 32.8$  Hz, 2H, piperazine), 1.85 (s, 1H, piperazine), 1.81 - 1.68 (m, 2H, -O-CH<sub>2</sub>-CH<sub>2</sub>-CH<sub>2</sub>-N); <sup>13</sup>C NMR (101 MHz)  $\delta$  172.66, 164.22, 161.62, 160.76, 158.65, 153.15, 152.10, 149.04, 139.86, 136.56, 133.99, 131.73, 131.67, 129.86, 129.48, 129.38, 127.49, 126.95, 126.90, 114.49, 108.94, 106.33, 96.41, 93.58, 70.64, 60.66, 56.59, 54.80, 53.21, 52.52, 46.84, 41.85, 27.53; ESI-HRMS calcd for C<sub>43</sub>H<sub>43</sub>O<sub>9</sub>N<sub>4</sub>Cl<sub>2</sub> [M+H]<sup>+</sup>829.24016, found 829.24078.

**Data for** 3-(3-(4-(5-chloro-3-methyl-1-(pyridin-2-yl)-1H-pyrazole-4-carbonyl)piperazin-1-yl)propoxy)-5,7-dimethoxy-2-(3,4,5-trimethoxyphenyl)-4H-chromen-4-one (**D7**): White solid, yield: 31%. m.p 150.1-151.2°C; <sup>1</sup>H NMR (400 MHz, DMSO)  $\delta$  8.60 - 8.55 (m, 1H, pyridine-6-H), 8.09 - 8.04 (m, 1H, pyridine-4-H), 7.75 (d,  $J = 8.1$  Hz, 1H, pyridine-3-H), 7.52 (ddd,  $J = 7.5, 4.9, 0.9$  Hz, 1H, pyridine-5-H), 7.36 (s, 2H, Ph), 6.84 (d,  $J = 2.1$  Hz, 1H, Ph), 6.50 (d,  $J = 2.1$  Hz, 1H, Ph), 3.99 (t,  $J = 6.1$  Hz, 2H, -O-CH<sub>2</sub>-CH<sub>2</sub>-CH<sub>2</sub>-N), 3.90 (s, 3H, Ph-OCH<sub>3</sub>), 3.86 (d,  $J = 12.0$  Hz, 9H, Ph-OCH<sub>3</sub>), 3.74 (s, 3H, Ph-OCH<sub>3</sub>), 3.58 (s, 2H, piperazine), 3.28 (s, 2H, piperazine), 2.39 - 2.34 (m, 2H, -O-CH<sub>2</sub>-CH<sub>2</sub>-CH<sub>2</sub>-N), 2.31 (s, 4H, piperazine), 2.23 (s, 3H, pyrazol-CH<sub>3</sub>), 1.84 - 1.75 (m, 2H, -O-CH<sub>2</sub>-CH<sub>2</sub>-CH<sub>2</sub>-N); <sup>13</sup>C NMR (101 MHz, DMSO)  $\delta$  172.66, 164.21, 161.38, 160.74, 158.64, 153.15, 150.91, 148.76, 148.68, 140.42, 139.93, 139.80, 126.11, 124.99, 124.22, 118.88, 116.37, 108.93, 106.29, 96.39, 93.56, 70.68, 60.65, 56.57, 56.52, 54.87, 53.79, 52.87, 47.06, 41.88, 27.63, 13.13; ESI-HRMS calcd for C<sub>37</sub>H<sub>41</sub>O<sub>9</sub>N<sub>5</sub>Cl [M+H]<sup>+</sup>734.25873, found 734.25623.

**Data for** 3-(3-(4-(5-chloro-3-phenyl-1-(pyridin-2-yl)-1H-pyrazole-4-carbonyl)piperazin-1-yl)propoxy)-5,7-dimethoxy-2-(3,4,5-trimethoxyphenyl)-4H-chromen-4-one (**D8**): White solid, yield: 42%. m.p 82.7-84.6°C; <sup>1</sup>H NMR (400 MHz, DMSO)  $\delta$  8.63 (dd,  $J = 4.8, 1.1$  Hz, 1H, Pyridine-6-H), 8.13 (td,  $J = 7.9, 1.9$  Hz, 1H, Pyridine-



4-H), 7.90 (d,  $J$  = 8.1 Hz, 1H, Pyridine-3-H), 7.67 (d,  $J$  = 6.9 Hz, 2H, Ph), 7.58 (ddd,  $J$  = 7.5, 4.9, 0.9 Hz, 1H, Pyridine-5-H), 7.52 – 7.43 (m, 3H, Ph), 7.34 (s, 2H, Ph), 6.83 (d,  $J$  = 2.2 Hz, 1H, Ph), 6.49 (d,  $J$  = 2.2 Hz, 1H, Ph), 3.95 (t,  $J$  = 6.1 Hz, 2H, -O-CH<sub>2</sub>-CH<sub>2</sub>-CH<sub>2</sub>-N), 3.90 (s, 3H, Ph-OCH<sub>3</sub>), 3.85 (d,  $J$  = 6.6 Hz, 9H, Ph-OCH<sub>3</sub>), 3.73 (s, 3H, Ph-OCH<sub>3</sub>), 3.62 (d,  $J$  = 60.6 Hz, 2H, piperazine), 3.24 (d,  $J$  = 33.8 Hz, 2H, piperazine), 2.35 (s, 1H, piperazine), 2.29 (t,  $J$  = 7.1 Hz, 2H, -O-CH<sub>2</sub>-CH<sub>2</sub>-CH<sub>2</sub>-N), 2.19 (s, 2H, piperazine), 1.85 (s, 1H, piperazine), 1.79 – 1.67 (m, 2H, -O-CH<sub>2</sub>-CH<sub>2</sub>-CH<sub>2</sub>-N); <sup>13</sup>C NMR (101 MHz, DMSO)  $\delta$  172.65, 164.21, 161.47, 160.73, 158.64, 153.14, 150.87, 149.13, 148.89, 140.39, 140.11, 139.79, 131.50, 129.64, 129.42, 126.99, 126.09, 119.20, 115.46, 108.91, 106.26, 96.39, 93.56, 70.60, 60.64, 56.55, 54.80, 53.15, 52.52, 46.84, 41.82, 27.53; ESI-HRMS calcd for C<sub>42</sub>H<sub>43</sub>O<sub>9</sub>N<sub>5</sub>Cl [M+H]<sup>+</sup>796.27438, found 796.27173.

**Data for 3-(3-(4-(5-chloro-1-(4-methoxyphenyl)-3-methyl-1H-pyrazole-4-carbonyl)piperazin-1-yl)propoxy)-5,7-dimethoxy-2-(3,4,5-trimethoxyphenyl)-4H-chromen-4-one (D9):** White solid, yield: 64%. m.p 170.2-171.8°C; <sup>1</sup>H NMR (400 MHz, DMSO)  $\delta$  7.43 (d,  $J$  = 9.0 Hz, 2H, Ph-H), 7.32 (s, 2H, Ph-H), 7.05 (d,  $J$  = 9.0 Hz, 2H, Ph-H), 6.79 (d,  $J$  = 2.3 Hz, 1H, Ph-H), 6.45 (d,  $J$  = 2.3 Hz, 1H, Ph-H), 3.95 (t,  $J$  = 6.2 Hz, 2H, -O-CH<sub>2</sub>-CH<sub>2</sub>-CH<sub>2</sub>-N), 3.86 (s, 3H, Ph-OCH<sub>3</sub>), 3.82 (d,  $J$  = 14.6 Hz, 9H, Ph-OCH<sub>3</sub>), 3.78 (s, 3H, Ph-OCH<sub>3</sub>), 3.70 (s, 3H, Ph-OCH<sub>3</sub>), 3.42 (d,  $J$  = 101.3 Hz, 4H, piperazine), 2.32 (t,  $J$  = 7.3 Hz, 2H, -O-CH<sub>2</sub>-CH<sub>2</sub>-CH<sub>2</sub>-N), 2.25 (s, 4H, piperazine), 2.15 (s, pyrazol-CH<sub>3</sub>), 1.78 – 1.72 (m, 2H, -O-CH<sub>2</sub>-CH<sub>2</sub>-CH<sub>2</sub>-N); <sup>13</sup>C NMR (101 MHz, )  $\delta$  172.72, 164.28, 161.86, 160.83, 159.80, 158.71, 153.22, 152.16, 147.77, 140.50, 139.93, 130.78, 127.37, 126.18, 125.12, 114.83, 114.54, 109.02, 106.43, 96.47, 93.64, 70.77, 60.72, 56.66, 56.58, 56.05, 54.93, 53.83, 52.97, 47.23, 41.89, 27.70, 13.18; ESI-HRMS calcd for C<sub>39</sub>H<sub>44</sub>O<sub>10</sub>N<sub>4</sub>Cl [M+H]<sup>+</sup>763.27405, found 763.27185.

**Data for 3-(3-(4-(5-chloro-1,3-dimethyl-1H-pyrazole-4-carbonyl)piperazin-1-yl)propoxy)-5,7-dimethoxy-2-(3,4,5-trimethoxyphenyl)-4H-chromen-4-one (D10):** White solid, yield: 32%. m.p 148.4-150.2°C; <sup>1</sup>H NMR (400 MHz, DMSO)  $\delta$  7.36 (s, 2H, Ph-H), 6.84 (d,  $J$  = 2.2 Hz, 1H, Ph-H), 6.50 (d,  $J$  = 2.2 Hz, 1H, Ph-H), 3.98 (t,  $J$  = 6.1 Hz, 2H, -O-CH<sub>2</sub>-CH<sub>2</sub>-CH<sub>2</sub>-N), 3.90 (s, 3H, Ph-OCH<sub>3</sub>), 3.86 (d,  $J$  = 11.4 Hz, 9H, Ph-OCH<sub>3</sub>), 3.74 (s, 3H, -CH<sub>3</sub>), 3.73 (s, 3H, Ph-OCH<sub>3</sub>), 3.51 (s, 2H, piperazine), 3.27 (s, 2H, piperazine), 2.34 (t,  $J$  = 7.2 Hz, 2H, -O-CH<sub>2</sub>-CH<sub>2</sub>-CH<sub>2</sub>-N), 2.26 (s, 4H, piperazine), 2.10 (s, 3H, pyrazol-CH<sub>3</sub>), 1.79 (dd,  $J$  = 13.5, 6.6 Hz, 2H, -O-CH<sub>2</sub>-CH<sub>2</sub>-CH<sub>2</sub>-N); <sup>13</sup>C NMR (101 MHz, DMSO)  $\delta$  172.68, 164.21, 162.12, 160.73, 158.65, 153.14, 152.11, 146.22, 140.40, 139.75, 126.10, 125.09, 112.91, 108.90, 106.25, 96.39, 93.55, 70.68, 60.64, 56.55, 56.53, 54.89, 53.69, 53.15, 47.15, 41.89, 36.39, 27.59, 13.04; ESI-HRMS calcd for C<sub>33</sub>H<sub>40</sub>O<sub>9</sub>N<sub>4</sub>Cl [M+H]<sup>+</sup>671.24783, found 671.24890.

**Data for 3-(4-(4-(5-chloro-3-methyl-1-phenyl-1H-pyrazole-4-carbonyl)piperazin-1-yl)butoxy)-5,7-dimethoxy-2-(3,4,5-trimethoxyphenyl)-4H-chromen-4-one (D11):** Yellow solid, yield: 35%. m.p 128.9-129.7°C; <sup>1</sup>H NMR (400 MHz, DMSO)  $\delta$  7.62 – 7.49 (m, 5H, Ph-H), 7.38 (s, 2H, Ph-H), 6.84 (d,  $J$  = 2.2 Hz, 1H, Ph-H), 6.49 (d,  $J$  = 2.2 Hz, 1H, Ph-H), 3.96 (t,  $J$  = 6.2 Hz, 2H, -O-CH<sub>2</sub>-CH<sub>2</sub>-CH<sub>2</sub>-CH<sub>2</sub>-N), 3.90 (s, 3H, Ph-OCH<sub>3</sub>), 3.86 (d,  $J$  = 11.5 Hz, 9H, Ph-OCH<sub>3</sub>), 3.74 (s, 3H, Ph-OCH<sub>3</sub>), 3.58 (s, 4H, piperazine), 2.33 (s, 3H, piperazine), 2.27 (t,  $J$  = 6.8 Hz, 2H, -O-CH<sub>2</sub>-CH<sub>2</sub>-CH<sub>2</sub>-CH<sub>2</sub>-N), 2.25 (s, 1H, piperazine), 2.22 (s, 3H, pyrazol-CH<sub>3</sub>), 1.70 – 1.59 (m, 2H, -O-CH<sub>2</sub>-CH<sub>2</sub>-CH<sub>2</sub>-CH<sub>2</sub>-N), 1.55 – 1.44 (m, 2H, -O-CH<sub>2</sub>-CH<sub>2</sub>-CH<sub>2</sub>-CH<sub>2</sub>-N); <sup>13</sup>C NMR (101 MHz, DMSO)  $\delta$  172.69, 164.20, 161.67, 160.72, 158.63, 153.12, 152.01, 148.19, 140.41, 139.76, 137.76, 129.74, 129.20, 126.13, 125.64, 124.94, 115.01, 108.90, 106.18, 96.38, 93.54, 72.03, 60.64, 57.66, 56.51, 53.80, 52.90, 47.15, 41.95, 27.99, 23.23, 13.14; ESI-HRMS calcd for C<sub>39</sub>H<sub>44</sub>O<sub>9</sub>N<sub>4</sub>Cl [M+H]<sup>+</sup>747.27913, found 747.27985.

**Data for 3-(4-(4-(5-chloro-3-methyl-1-(4-nitrophenyl)-1H-pyrazole-4-carbonyl)piperazin-1-yl)butoxy)-5,7-dimethoxy-2-(3,4,5-trimethoxyphenyl)-4H-chromen-4-one (D12):** Yellow solid, yield: 11%. m.p. 130.4-131.6°C; <sup>1</sup>H NMR (400 MHz, DMSO)  $\delta$  8.48 – 8.36 (m, 2H, Ph-H), 8.02 – 7.90 (m, 2H, Ph-H), 7.38 (s, 2H, Ph-H), 6.84 (d,  $J$  = 1.9 Hz, 1H, Ph-H), 6.49 (d,  $J$  = 2.1 Hz, 1H, Ph-H), 3.96 (t,  $J$  = 6.2 Hz, 2H, -O-CH<sub>2</sub>-CH<sub>2</sub>-CH<sub>2</sub>-CH<sub>2</sub>-N), 3.90 (s, 3H, Ph-OCH<sub>3</sub>), 3.86 (d,  $J$  = 12.3 Hz, 9H, Ph-OCH<sub>3</sub>), 3.74 (s, 3H, Ph-OCH<sub>3</sub>), 3.51 (d,  $J$  = 59.6 Hz, 4H,

piperazine), 2.34 (s, 2H, piperazine), 2.28 (d,  $J = 6.8$  Hz, 2H, -O-CH<sub>2</sub>-CH<sub>2</sub>-CH<sub>2</sub>-CH<sub>2</sub>-N), 2.25 (s, 2H, piperazine), 2.25 (s, 3H, pyrazol-CH<sub>3</sub>), 1.64 (dd,  $J = 14.1, 6.5$  Hz, 2H, -O-CH<sub>2</sub>-CH<sub>2</sub>-CH<sub>2</sub>-CH<sub>2</sub>-N), 1.51 (dd,  $J = 14.0, 7.1$  Hz, 2H, -O-CH<sub>2</sub>-CH<sub>2</sub>-CH<sub>2</sub>-CH<sub>2</sub>-N); <sup>13</sup>C NMR (101 MHz, DMSO)  $\delta$  172.69, 164.20, 161.18, 160.71, 158.63, 153.12, 152.01, 149.59, 146.88, 142.60, 140.42, 139.76, 126.12, 125.72, 125.35, 125.27, 116.51, 108.89, 106.17, 96.37, 93.54, 72.03, 60.65, 57.65, 56.52, 53.81, 52.88, 47.08, 41.96, 27.99, 23.23, 13.15; ESI-HRMS calcd for C<sub>39</sub>H<sub>43</sub>O<sub>11</sub>N<sub>5</sub>Cl [M+H]<sup>+</sup>792.26421, found 792.26129.

**Data for** 3-(4-(4-(5-chloro-1-(4-nitrophenyl)-3-phenyl-1H-pyrazole-4-carbonyl)piperazin-1-yl)butoxy)-5,7-dimethoxy-2-(3,4,5-trimethoxyphenyl)-4H-chromen-4-one (**D13**): Yellow solid, yield: 31%. m.p. 112.9-114.3°C; <sup>1</sup>H NMR (400 MHz, DMSO)  $\delta$  8.49 – 8.45 (m, 2H, Ph-H), 8.10 – 8.06 (m, 2H, Ph-H), 7.67 (dd,  $J = 8.1, 1.3$  Hz, 2H, Ph-H), 7.53 – 7.45 (m, 3H, Ph-H), 7.37 (s, 2H, Ph-H), 6.84 (d,  $J = 2.2$  Hz, 1H, Ph-H), 6.49 (d,  $J = 2.2$  Hz, 1H, Ph-H), 3.93 (t,  $J = 6.3$  Hz, 2H, -O-CH<sub>2</sub>-CH<sub>2</sub>-CH<sub>2</sub>-CH<sub>2</sub>-N), 3.90 (s, 3H, Ph-OCH<sub>3</sub>), 3.85 (d,  $J = 7.8$  Hz, 9H, Ph-OCH<sub>3</sub>), 3.73 (s, 3H, Ph-OCH<sub>3</sub>), 3.64 (d,  $J = 38.2$  Hz, 2H, piperazine), 3.29 (d,  $J = 36.8$  Hz, 2H, piperazine), 2.41 – 2.21 (m, 3H, piperazine), 2.18 (d,  $J = 7.1$  Hz, 2H, -O-CH<sub>2</sub>-CH<sub>2</sub>-CH<sub>2</sub>-CH<sub>2</sub>-N), 1.86 (s, 1H, piperazine), 1.60 (dd,  $J = 14.1, 6.6$  Hz, 2H, -O-CH<sub>2</sub>-CH<sub>2</sub>-CH<sub>2</sub>-CH<sub>2</sub>-N), 1.45 (dd,  $J = 13.8, 6.9$  Hz, 2H, -O-CH<sub>2</sub>-CH<sub>2</sub>-CH<sub>2</sub>-CH<sub>2</sub>-N); <sup>13</sup>C NMR (101 MHz, DMSO)  $\delta$  172.68, 164.20, 161.27, 160.71, 158.62, 153.11, 151.99, 149.90, 147.19, 142.52, 140.41, 139.75, 131.34, 129.46, 127.03, 126.40, 126.11, 126.06, 125.34, 115.57, 108.89, 106.16, 96.37, 93.53, 72.00, 60.64, 57.58, 56.51, 53.20, 52.54, 46.83, 41.90, 27.95, 23.15; ESI-HRMS calcd for C<sub>44</sub>H<sub>45</sub>O<sub>11</sub>N<sub>5</sub>Cl [M+H]<sup>+</sup>854.27986, found 854.27777.

**Data for** 3-(4-(4-(5-chloro-1-(4-chlorophenyl)-3-methyl-1H-pyrazole-4-carbonyl)piperazin-1-yl)butoxy)-5,7-dimethoxy-2-(3,4,5-trimethoxyphenyl)-4H-chromen-4-one (**D14**): Yellow solid, yield: 10%. m.p. 88.5-89.9°C; <sup>1</sup>H NMR (400 MHz, DMSO)  $\delta$  7.65 (s, 4H, Ph-H), 7.38 (s, 2H, Ph-H), 6.85 (s, 1H, Ph-H), 6.50 (d,  $J = 1.6$  Hz, 1H, Ph-H), 3.96 (t,  $J = 6.2$  Hz, 2H, -O-CH<sub>2</sub>-CH<sub>2</sub>-CH<sub>2</sub>-CH<sub>2</sub>-N), 3.90 (s, 3H, Ph-OCH<sub>3</sub>), 3.86 (d,  $J = 11.6$  Hz, 9H, Ph-OCH<sub>3</sub>), 3.74 (s, 3H, Ph-OCH<sub>3</sub>), 3.52 (d,  $J = 40.0$  Hz, 4H, piperazine), 2.31 (d,  $J = 15.2$  Hz, 3H, piperazine), 2.29 – 2.25 (m, 2H, -O-CH<sub>2</sub>-CH<sub>2</sub>-CH<sub>2</sub>-CH<sub>2</sub>-N), 2.25 (s, 1H, piperazine), 2.22 (s, 3H, pyrazol-CH<sub>3</sub>), 1.63 (dd,  $J = 14.0, 6.5$  Hz, 2H, -O-CH<sub>2</sub>-CH<sub>2</sub>-CH<sub>2</sub>-CH<sub>2</sub>-N), 1.50 (d,  $J = 6.8$  Hz, 2H, -O-CH<sub>2</sub>-CH<sub>2</sub>-CH<sub>2</sub>-CH<sub>2</sub>-N); <sup>13</sup>C NMR (101 MHz, DMSO)  $\delta$  172.69, 164.20, 161.51, 160.72, 158.63, 153.12, 152.01, 148.54, 140.41, 139.76, 136.58, 133.61, 129.77, 127.32, 126.12, 125.09, 115.30, 108.89, 106.18, 96.38, 93.54, 72.03, 60.64, 57.65, 56.51, 53.81, 52.87, 47.11, 41.92, 27.98, 23.23, 13.13; ESI-HRMS calcd for C<sub>39</sub>H<sub>43</sub>O<sub>9</sub>N<sub>4</sub>Cl<sub>2</sub> [M+H]<sup>+</sup>781.24016, found 781.23767.

**Data for** 3-(4-(4-(5-chloro-1-(4-chlorophenyl)-3-phenyl-1H-pyrazole-4-carbonyl)piperazin-1-yl)butoxy)-5,7-dimethoxy-2-(3,4,5-trimethoxyphenyl)-4H-chromen-4-one (**D15**): White solid, yield: 46%. m.p. 101.8-102.8°C; <sup>1</sup>H NMR (400 MHz, DMSO)  $\delta$  7.79 – 7.75 (m, 2H, Ph-H), 7.71 – 7.63 (m, 4H, Ph-H), 7.50 – 7.42 (m, 3H, Ph-H), 7.36 (s, 2H, Ph-H), 6.84 (d,  $J = 2.2$  Hz, 1H, Ph-H), 6.49 (d,  $J = 2.2$  Hz, 1H, Ph-H), 3.94 (d,  $J = 6.2$  Hz, 2H, -O-CH<sub>2</sub>-CH<sub>2</sub>-CH<sub>2</sub>-CH<sub>2</sub>-N), 3.90 (s, 3H, Ph-OCH<sub>3</sub>), 3.84 (d,  $J = 6.4$  Hz, 9H, Ph-OCH<sub>3</sub>), 3.73 (s, 3H, Ph-OCH<sub>3</sub>), 3.68 – 3.56 (m, 2H, piperazine), 3.26 (d,  $J = 35.0$  Hz, 2H, piperazine), 2.31 (d,  $J = 25.5$  Hz, 3H, piperazine), 2.21 – 2.17 (m, 2H, -O-CH<sub>2</sub>-CH<sub>2</sub>-CH<sub>2</sub>-CH<sub>2</sub>-N), 1.84 (s, 1H, piperazine), 1.65 – 1.57 (m, 2H, -O-CH<sub>2</sub>-CH<sub>2</sub>-CH<sub>2</sub>-CH<sub>2</sub>-N), 1.45 (dd,  $J = 13.7, 7.0$  Hz, 2H, -O-CH<sub>2</sub>-CH<sub>2</sub>-CH<sub>2</sub>-CH<sub>2</sub>-N); <sup>13</sup>C NMR (101 MHz, DMSO)  $\delta$  172.73, 164.27, 161.62, 160.81, 158.69, 153.19, 152.05, 149.16, 140.48, 139.92, 136.61, 134.07, 131.74, 129.92, 129.53, 129.43, 127.54, 127.02, 126.18, 114.59, 109.00, 106.35, 96.45, 93.64, 72.09, 60.71, 57.65, 56.62, 56.58, 53.23, 52.62, 46.92, 41.94, 28.02, 23.22; ESI-HRMS calcd for C<sub>44</sub>H<sub>45</sub>O<sub>9</sub>N<sub>4</sub>Cl<sub>2</sub> [M+H]<sup>+</sup>843.25581, found 843.25671.

**Data for** 3-(4-(4-(5-chloro-3-methyl-1-(pyridin-2-yl)-1H-pyrazole-4-carbonyl)piperazin-1-yl)butoxy)-5,7-dimethoxy-2-(3,4,5-trimethoxyphenyl)-4H-chromen-4-one (**D16**): White solid, yield: 20%. m.p. 111.1-112.3°C;

<sup>1</sup>H NMR (400 MHz, DMSO) δ 8.58 (dd, *J* = 4.8, 1.0 Hz, 1H, pyridine-6-H), 8.09 – 8.04 (m, 1H, pyridine-4-H), 7.75 (d, *J* = 8.1 Hz, 1H, pyridine-3-H), 7.52 (dd, *J* = 7.0, 5.3 Hz, 1H, pyridine-5-H), 7.38 (s, 2H, Ph-H), 6.84 (t, *J* = 3.5 Hz, 1H, Ph-H), 6.50 – 6.47 (m, 1H, Ph-H), 3.96 (t, *J* = 6.1 Hz, 2H, -O-CH<sub>2</sub>-CH<sub>2</sub>-CH<sub>2</sub>-N), 3.90 (s, 3H, Ph-OCH<sub>3</sub>), 3.85 (d, *J* = 11.1 Hz, 9H, Ph-OCH<sub>3</sub>), 3.74 (s, 3H, Ph-OCH<sub>3</sub>), 3.59 (s, 2H, piperazine), 3.30 (s, 2H, piperazine), 2.36 – 2.24 (m, 6H, piperazine(4H), -O-CH<sub>2</sub>-CH<sub>2</sub>-CH<sub>2</sub>-CH<sub>2</sub>-N(2H)), 2.23 (s, 3H, pyrazol-CH<sub>3</sub>), 1.63 (dd, *J* = 13.9, 6.6 Hz, 2H, -O-CH<sub>2</sub>-CH<sub>2</sub>-CH<sub>2</sub>-CH<sub>2</sub>-N), 1.50 (dd, *J* = 14.1, 7.1 Hz, 2H, -O-CH<sub>2</sub>-CH<sub>2</sub>-CH<sub>2</sub>-CH<sub>2</sub>-N); <sup>13</sup>C NMR (101 MHz, DMSO) δ 172.69, 164.21, 161.38, 160.74, 158.64, 153.13, 150.92, 148.76, 148.67, 140.42, 139.93, 139.81, 126.12, 124.99, 124.22, 118.87, 116.41, 108.92, 106.24, 96.39, 93.56, 72.04, 60.64, 57.66, 56.54, 53.80, 52.92, 47.10, 41.91, 27.99, 23.24, 13.13; ESI-HRMS calcd for C<sub>38</sub>H<sub>43</sub>O<sub>9</sub>N<sub>5</sub>Cl [M+H]<sup>+</sup>748.27438, found 748.27240.

**Data for 3-(4-(4-(5-chloro-3-phenyl-1-(pyridin-2-yl)-1H-pyrazole-4-carbonyl)piperazin-1-yl)butoxy)-5,7-dimethoxy-2-(3,4,5-trimethoxyphenyl)-4H-chromen-4-one (D17):** White solid, yield: 10%. m.p 101.3-102.6°C; <sup>1</sup>H NMR (400 MHz, DMSO) δ 8.65 – 8.62 (m, 1H, Pyridine-6-H), 8.13 (td, *J* = 8.1, 1.8 Hz, 1H, Pyridine-4-H), 7.90 (d, *J* = 8.1 Hz, 1H, Pyridine-3-H), 7.67 (d, *J* = 6.9 Hz, 2H, Ph-H), 7.58 (dd, *J* = 7.0, 5.3 Hz, 1H, Pyridine-5-H), 7.51 – 7.44 (m, 3H, Ph-H), 7.36 (s, 2H, Ph-H), 6.84 (d, *J* = 2.1 Hz, 1H, Ph-H), 6.49 (d, *J* = 2.1 Hz, 1H, Ph-H), 3.93 (t, *J* = 6.2 Hz, 2H, -O-CH<sub>2</sub>-CH<sub>2</sub>-CH<sub>2</sub>-CH<sub>2</sub>-N), 3.90 (s, 3H, Ph-OCH<sub>3</sub>), 3.84 (d, *J* = 5.8 Hz, 9H, Ph-OCH<sub>3</sub>), 3.73 (s, 3H, Ph-OCH<sub>3</sub>), 3.61 (d, *J* = 41.8 Hz, 2H, piperazine), 3.24 (d, *J* = 33.5 Hz, 2H, piperazine), 2.45 – 2.20 (m, 3H, piperazine), 2.18 (d, *J* = 6.9 Hz, 2H, -O-CH<sub>2</sub>-CH<sub>2</sub>-CH<sub>2</sub>-CH<sub>2</sub>-N), 1.84 (s, 1H, piperazine), 1.60 (dd, *J* = 13.9, 6.6 Hz, 2H, -O-CH<sub>2</sub>-CH<sub>2</sub>-CH<sub>2</sub>-CH<sub>2</sub>-N), 1.42 (dd, *J* = 15.7, 9.0 Hz, 2H, -O-CH<sub>2</sub>-CH<sub>2</sub>-CH<sub>2</sub>-CH<sub>2</sub>-N); <sup>13</sup>C NMR (101 MHz, DMSO) δ 172.68, 164.21, 161.47, 160.74, 158.63, 153.12, 150.88, 149.14, 148.89, 140.41, 140.11, 139.80, 131.51, 129.64, 129.42, 127.00, 126.11, 126.02, 119.19, 115.50, 108.91, 106.23, 96.38, 93.56, 72.02, 60.64, 57.59, 56.53, 53.13, 52.56, 46.85, 41.86, 27.95, 23.17; ESI-HRMS calcd for C<sub>43</sub>H<sub>45</sub>O<sub>9</sub>N<sub>5</sub>Cl [M+H]<sup>+</sup>810.29003, found 810.28766.

**Data for 3-(4-(4-(5-chloro-1-(4-methoxyphenyl)-3-methyl-1H-pyrazole-4-carbonyl)piperazin-1-yl)butoxy)-5,7-dimethoxy-2-(3,4,5-trimethoxyphenyl)-4H-chromen-4-one (D18):** White solid, yield: 24%. m.p 80.0-81.8°C; <sup>1</sup>H NMR (400 MHz, DMSO) δ 7.48 (d, *J* = 8.9 Hz, 2H, Ph-H), 7.38 (s, 2H, Ph-H), 7.09 (d, *J* = 9.0 Hz, 2H, Ph-H), 6.84 (d, *J* = 2.1 Hz, 1H, Ph-H), 6.49 (d, *J* = 2.1 Hz, 1H, Ph-H), 3.96 (t, *J* = 6.2 Hz, 2H, -O-CH<sub>2</sub>-CH<sub>2</sub>-CH<sub>2</sub>-CH<sub>2</sub>-N), 3.90 (s, 3H, Ph-OCH<sub>3</sub>), 3.86 (d, *J* = 11.0 Hz, 9H, Ph-OCH<sub>3</sub>), 3.83 (s, 3H, Ph-OCH<sub>3</sub>), 3.74 (s, 3H, Ph-OCH<sub>3</sub>), 3.49 (d, *J* = 55.9 Hz, 4H, piperazine), 2.36 (s, 3H, piperazine), 2.27 (s, 2H, -O-CH<sub>2</sub>-CH<sub>2</sub>-CH<sub>2</sub>-CH<sub>2</sub>-N), 2.23 (s, 1H, piperazine), 2.20 (s, 3H, pyrazol-CH<sub>3</sub>), 1.64 (dd, *J* = 13.8, 6.4 Hz, 2H, -O-CH<sub>2</sub>-CH<sub>2</sub>-CH<sub>2</sub>-CH<sub>2</sub>-N), 1.50 (d, *J* = 6.8 Hz, 2H, -O-CH<sub>2</sub>-CH<sub>2</sub>-CH<sub>2</sub>-CH<sub>2</sub>-N); <sup>13</sup>C NMR (101 MHz, DMSO) δ 172.69, 164.21, 161.80, 160.74, 159.73, 158.64, 153.13, 152.01, 147.72, 140.42, 139.81, 130.72, 127.31, 126.13, 125.08, 114.77, 114.48, 108.92, 106.24, 96.39, 93.56, 72.05, 60.65, 57.68, 56.54, 55.99, 53.77, 52.91, 47.18, 41.94, 28.00, 23.25, 13.13; ESI-HRMS calcd for C<sub>40</sub>H<sub>46</sub>O<sub>10</sub>N<sub>4</sub>Cl [M+H]<sup>+</sup>777.28970, found 777.28772.

**Data for 3-(4-(4-(5-chloro-1,3-dimethyl-1H-pyrazole-4-carbonyl)piperazin-1-yl)butoxy)-5,7-dimethoxy-2-(3,4,5-trimethoxyphenyl)-4H-chromen-4-one (D19):** White solid, yield: 28%. m.p 75.4-74.5°C; <sup>1</sup>H NMR (400 MHz, DMSO) δ 7.38 (s, 2H, Ph-H), 6.84 (s, 1H, Ph-H), 6.49 (s, 1H, Ph-H), 3.95 (t, *J* = 6.3 Hz, 2H, -O-CH<sub>2</sub>-CH<sub>2</sub>-CH<sub>2</sub>-CH<sub>2</sub>-N), 3.90 (s, 3H, Ph-OCH<sub>3</sub>), 3.86 (d, *J* = 11.3 Hz, 9H, Ph-OCH<sub>3</sub>), 3.74 (s, 3H, -CH<sub>3</sub>), 3.74 (s, 3H, Ph-OCH<sub>3</sub>), 3.54 (d, *J* = 16.9 Hz, 2H, piperazine), 3.28 (s, 2H, piperazine), 2.40 (s, 2H, piperazine), 2.26 (s, 2H, -O-CH<sub>2</sub>-CH<sub>2</sub>-CH<sub>2</sub>-CH<sub>2</sub>-N), 2.17 (s, 2H, piperazine), 2.11 (s, 3H, pyrazol-CH<sub>3</sub>), 1.70 – 1.58 (m, 2H, -O-CH<sub>2</sub>-CH<sub>2</sub>-CH<sub>2</sub>-CH<sub>2</sub>-N), 1.50 (d, *J* = 6.4 Hz, 2H, -O-CH<sub>2</sub>-CH<sub>2</sub>-CH<sub>2</sub>-CH<sub>2</sub>-N); <sup>13</sup>C NMR (101 MHz, DMSO) δ 172.69, 164.21, 162.13, 160.74, 158.63, 153.13, 152.01, 146.23, 140.42, 139.81, 126.12, 125.10, 112.94, 108.91, 106.22, 96.38,

95.35, 93.56, 72.01, 60.64, 57.64, 56.54, 53.78, 52.97, 47.08, 41.98, 36.39, 27.97, 23.18, 13.05; ESI-HRMS calcd for  $C_{34}H_{42}O_9N_4Cl$   $[M+H]^+$  685.26348, found 685.26392.

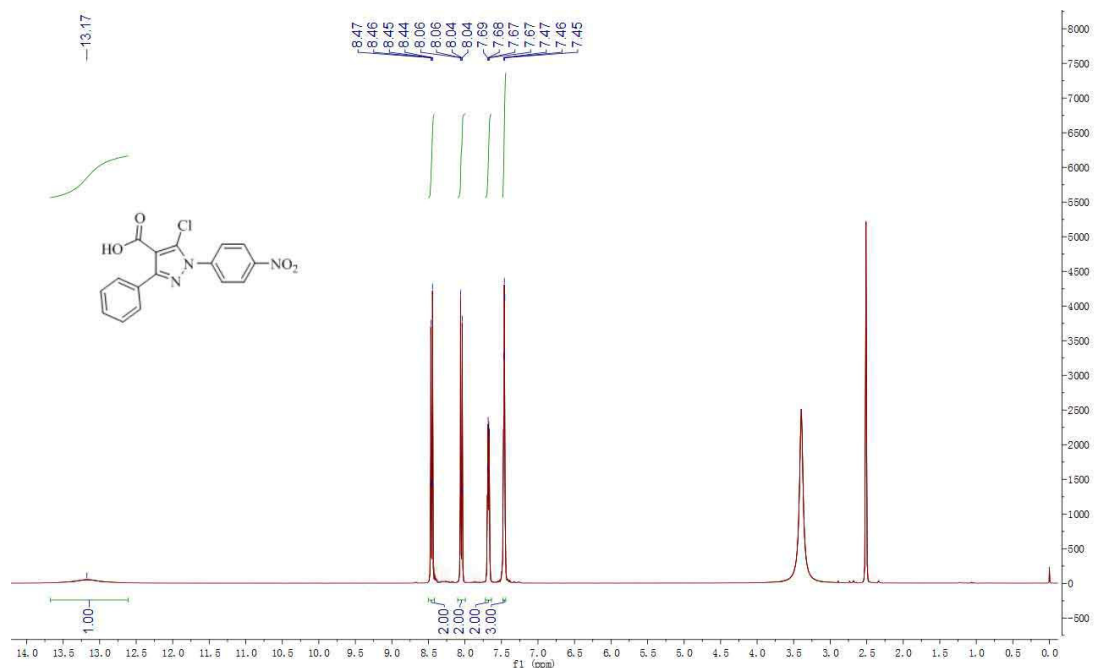

**Figure S1**  $^1H$  NMR spectrum of title compound **b-4**

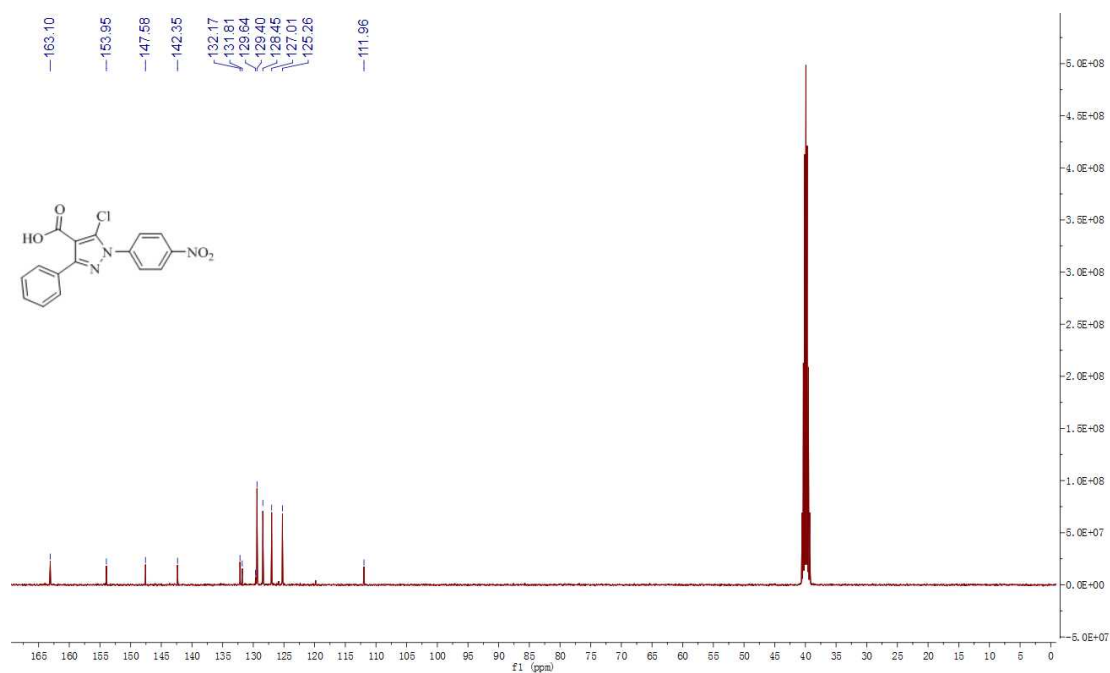

**Figure S2**  $^{13}C$  NMR spectrum of title compound **b-4**

8 #52 RT: 0.51 AV: 1 NL: 1.49E+005  
T: FTMS - p ESI Full ms [100.0000-1300.0000]

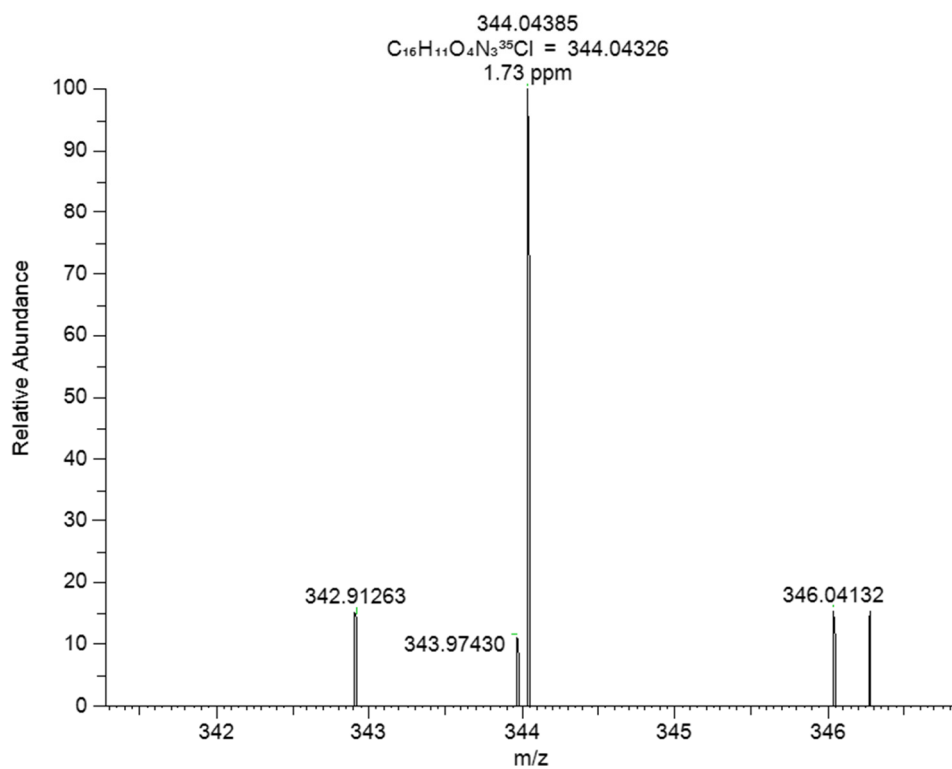

Figure S3 HRMS spectrum of title compound **b-4**

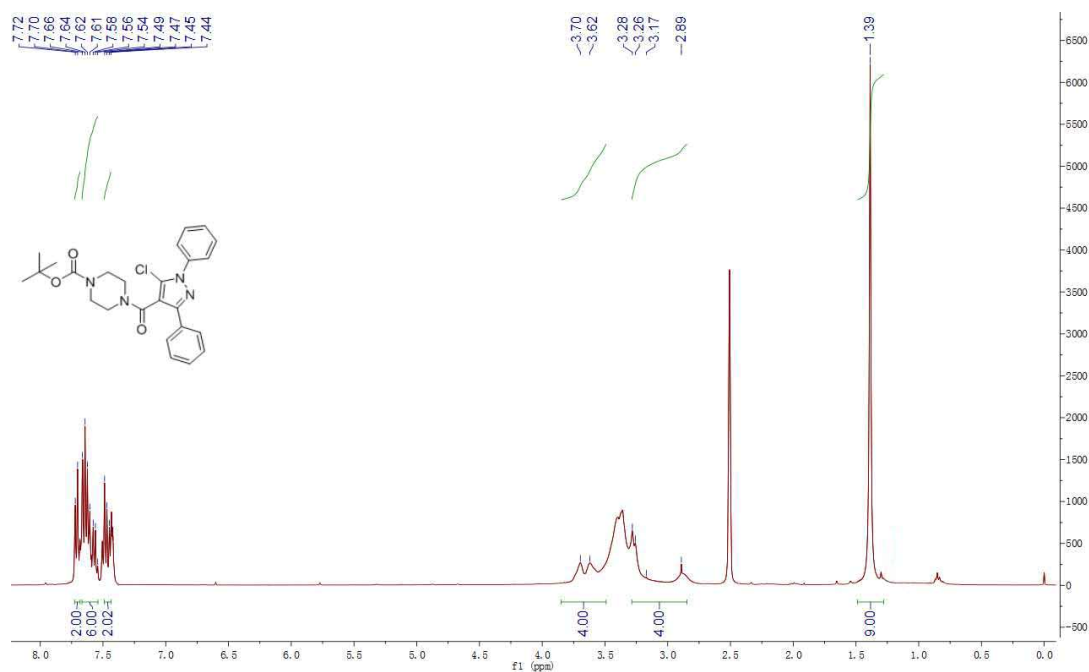

Figure S4  $^1H$  NMR spectrum of title compound **c-2**

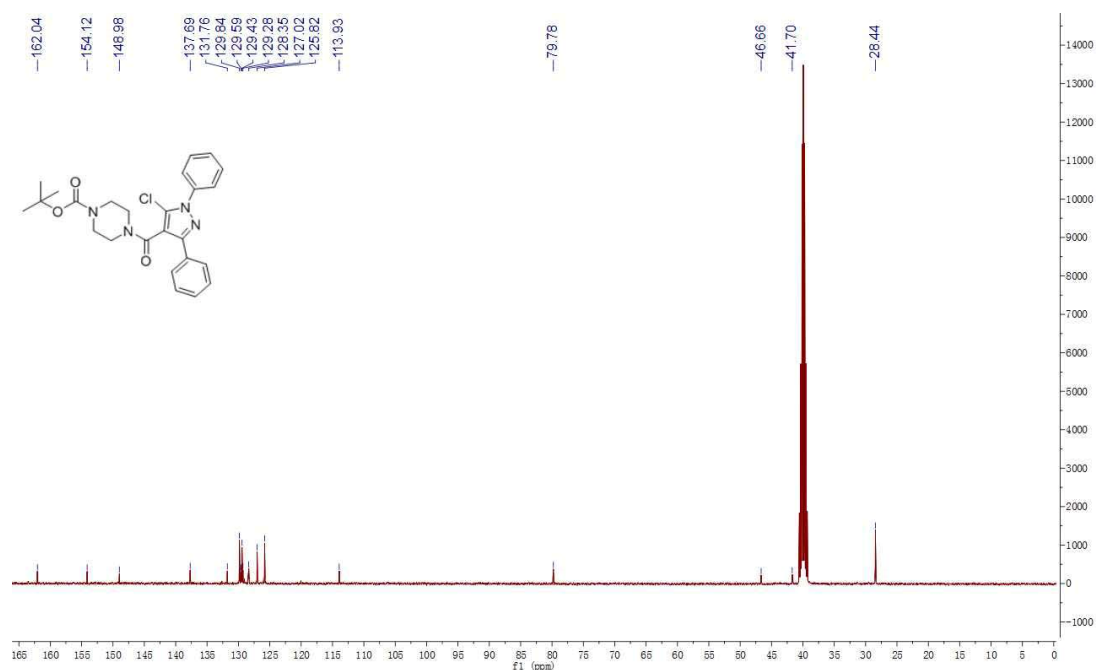

**Figure S5** <sup>13</sup>C NMR spectrum of title compound **c-2**

13 #45 RT: 0.44 AV: 1 NL: 2.58E+007  
T: FTMS + p ESI Full ms [100.0000-1300.0000]

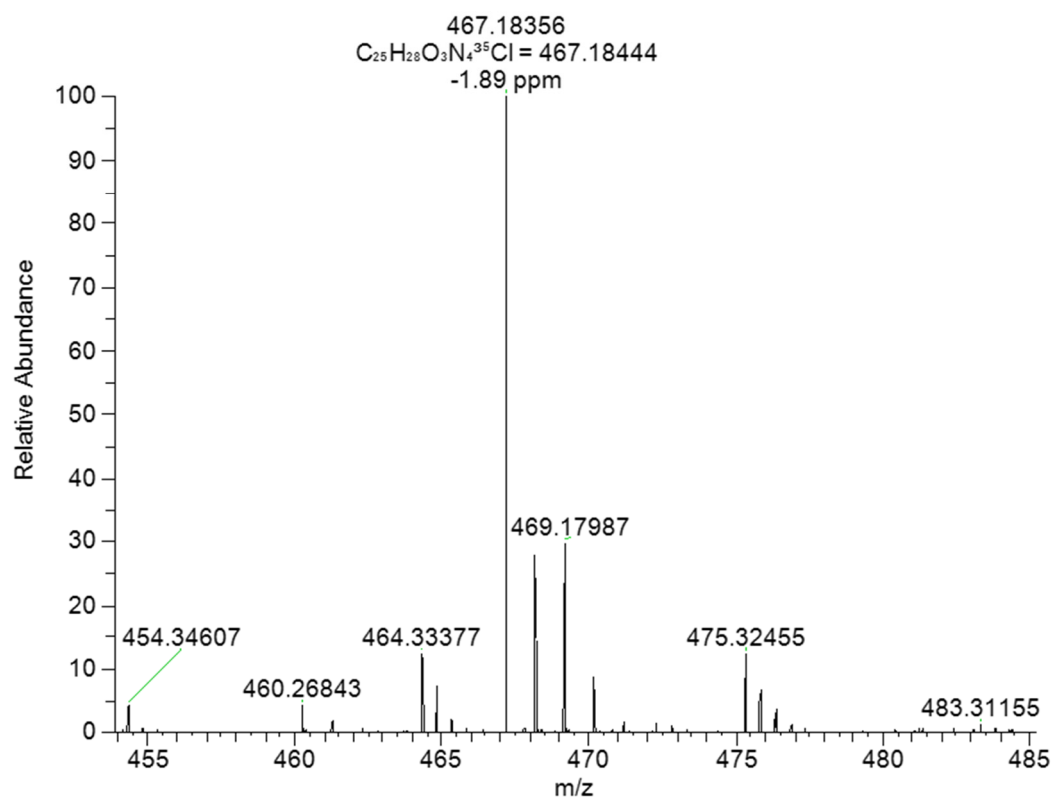

**Figure S6** HRMS spectrum of title compound **c-2**

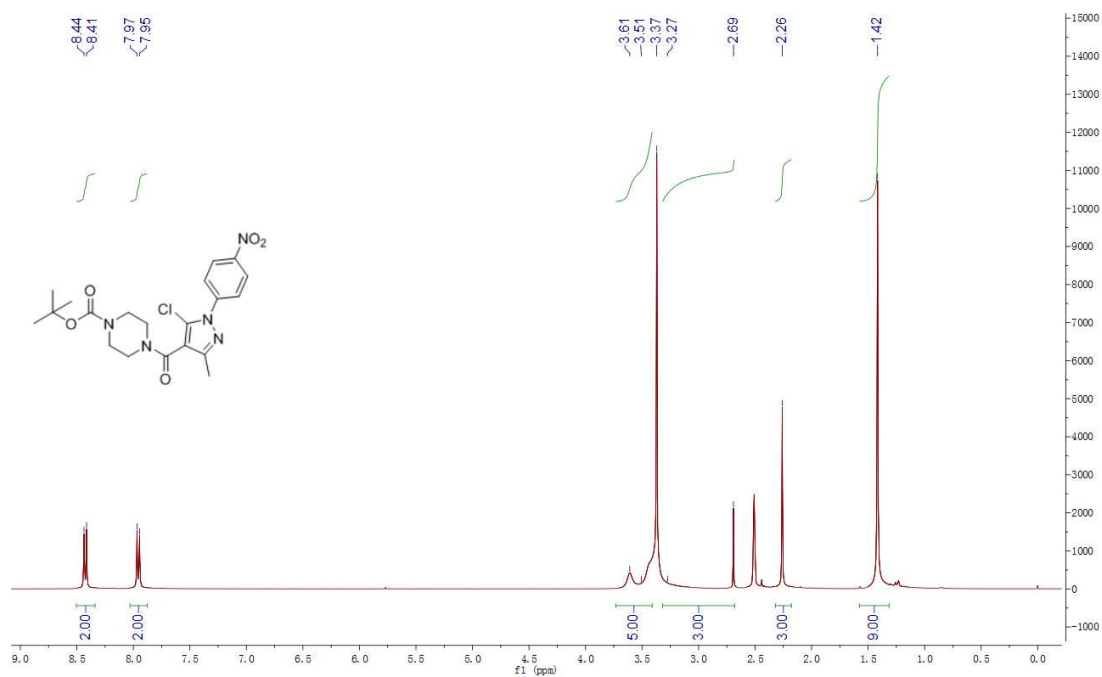

**Figure S7** <sup>1</sup>H NMR spectrum of title compound **c-3**

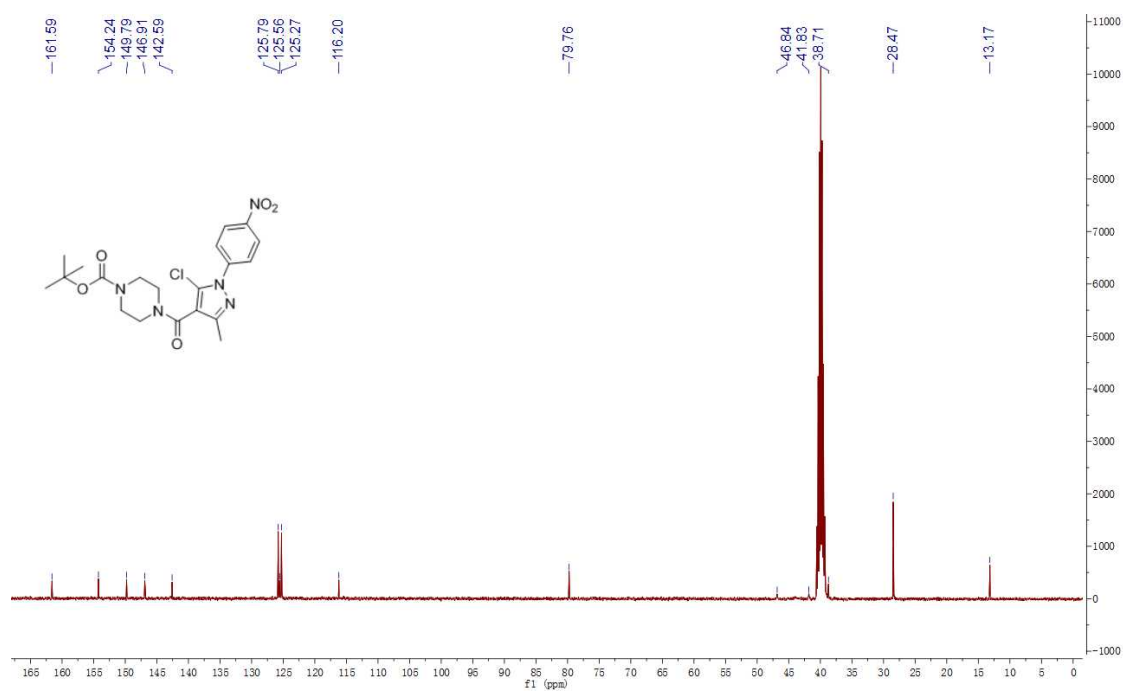

**Figure S8** <sup>13</sup>C NMR spectrum of title compound **c-3**

10 #35 RT: 0.34 AV: 1 NL: 7.83E+005  
T: FTMS + p ESI Full ms [100.0000-1300.0000]

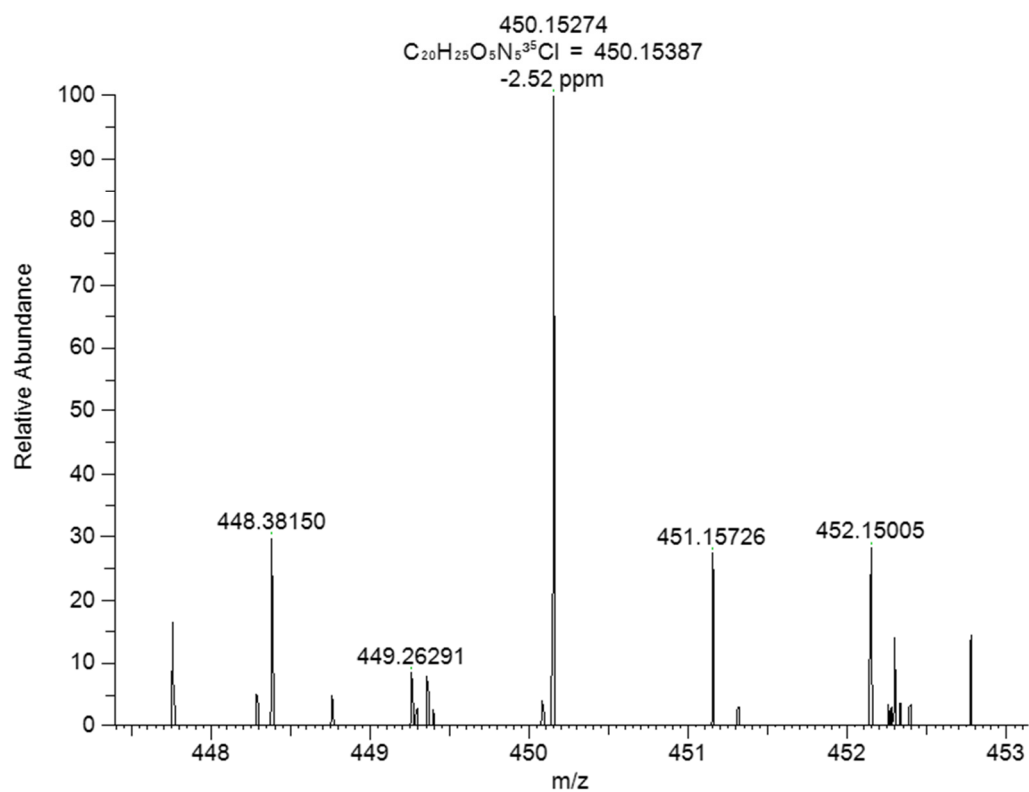

**Figure S9** HRMS spectrum of title compound **c-3**

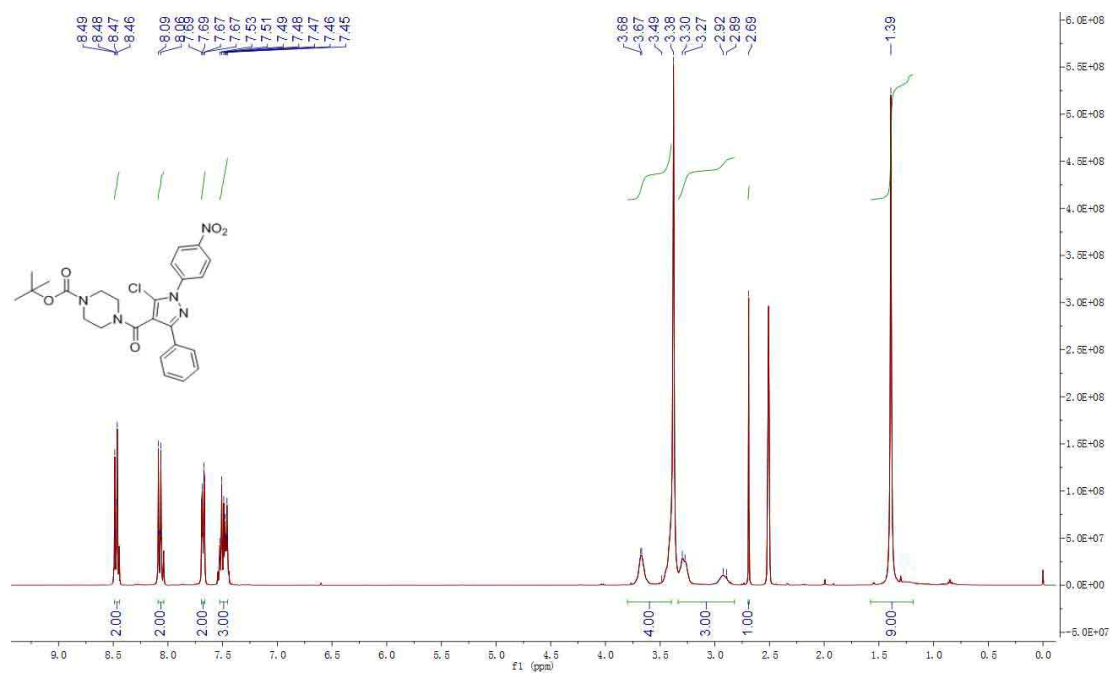

**Figure S10**  $^1H$  NMR spectrum of title compound **c-4**



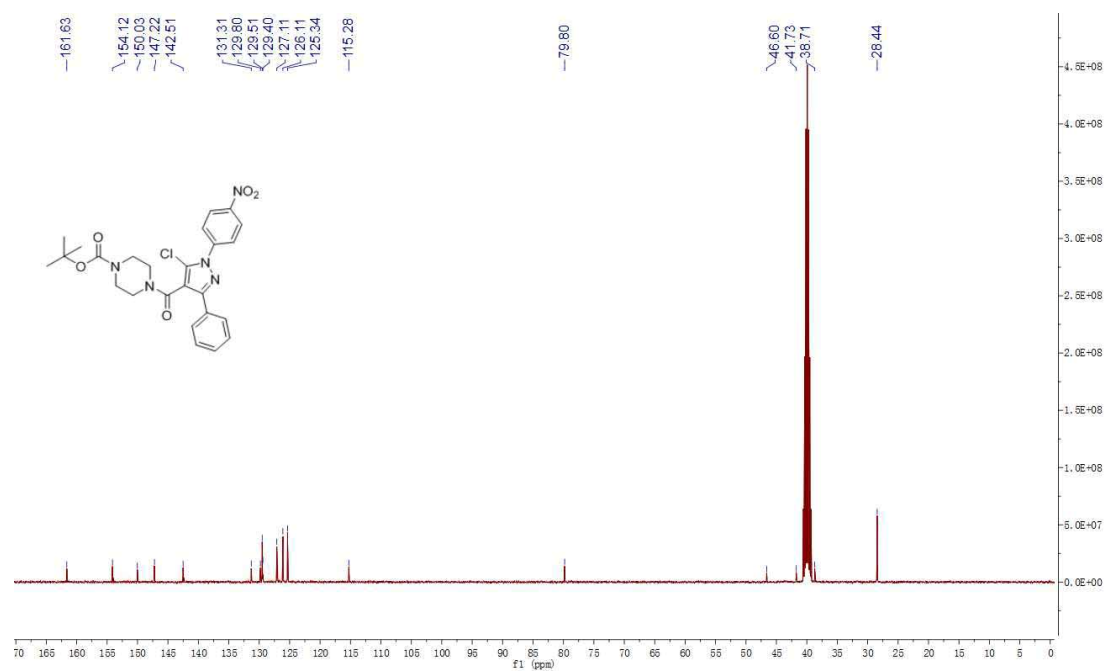

**Figure S11**  $^{13}\text{C}$  NMR spectrum of title compound **c-4**

9 #41 RT: 0.40 AV: 1 NL: 1.71E+007  
T: FTMS + p ESI Full ms [100.0000-1300.0000]

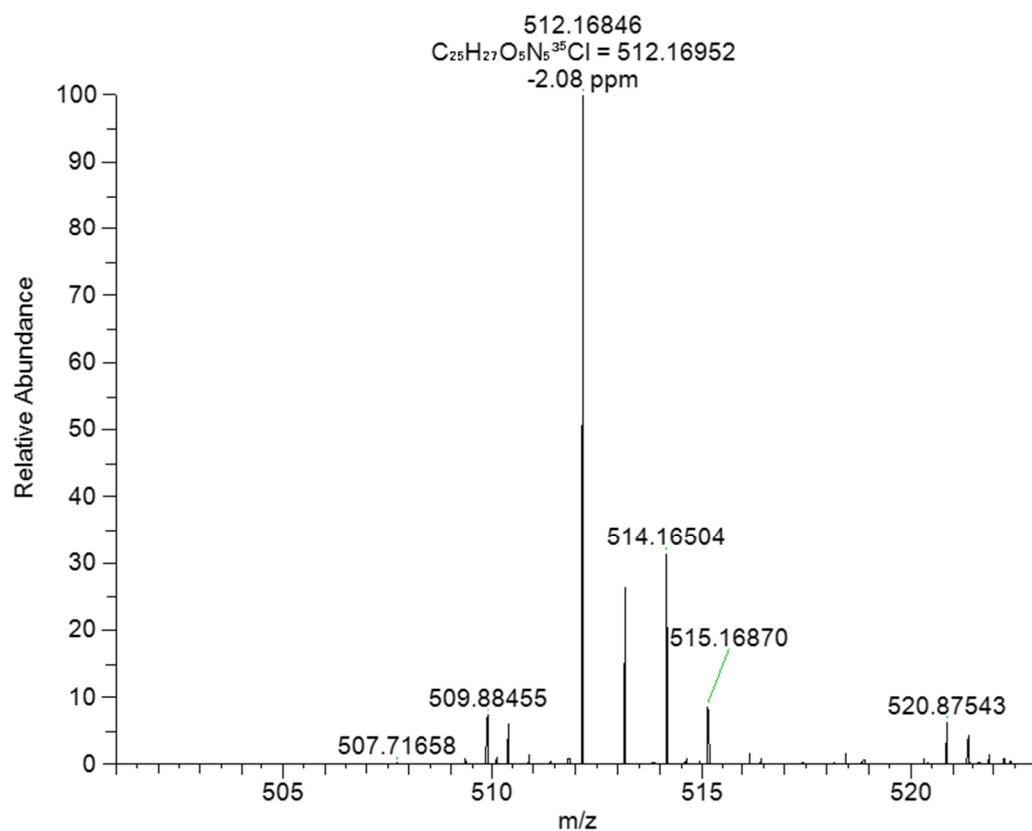

**Figure S12** HRMS spectrum of title compound **c-4**

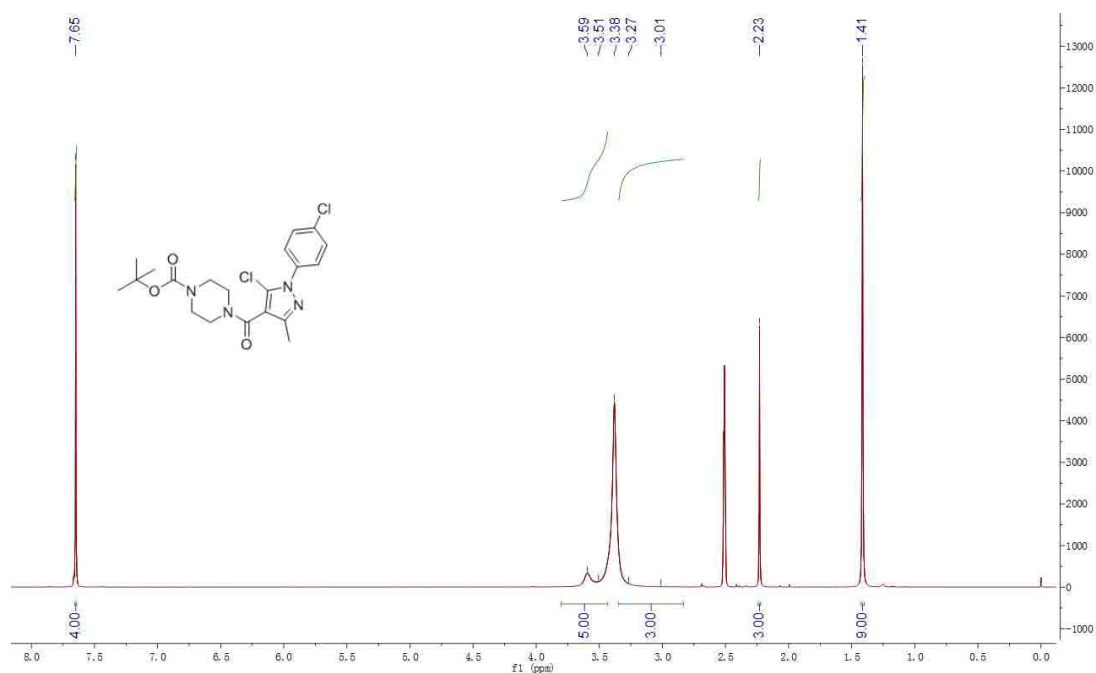

**Figure S13** <sup>1</sup>H NMR spectrum of title compound **c-5**

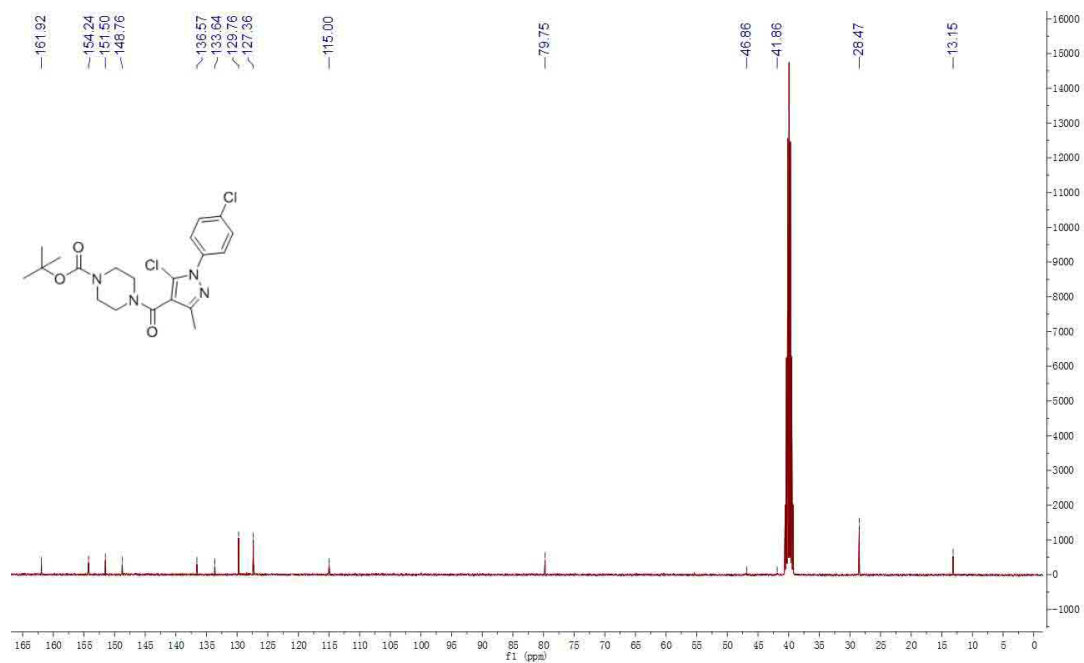

**Figure S14** <sup>13</sup>C NMR spectrum of title compound **c-5**

11 #39 RT: 0.38 AV: 1 NL: 4.15E+007  
T: FTMS + p ESI Full ms [100.0000-1300.0000]

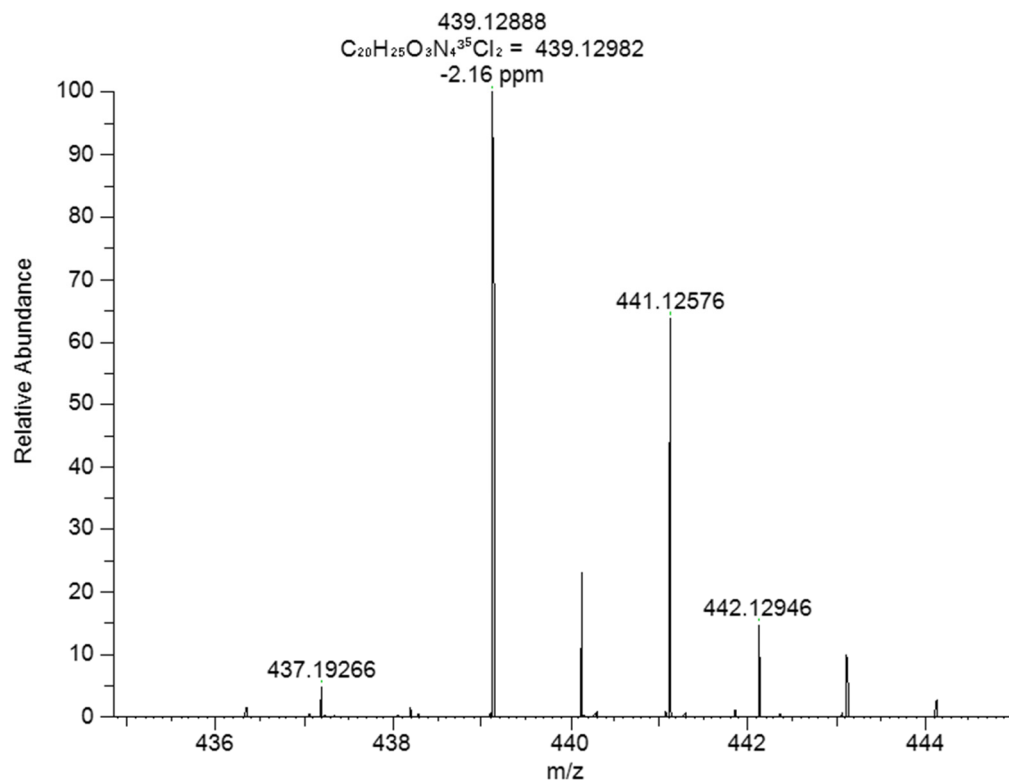

Figure S15 HRMS spectrum of title compound **c-5**

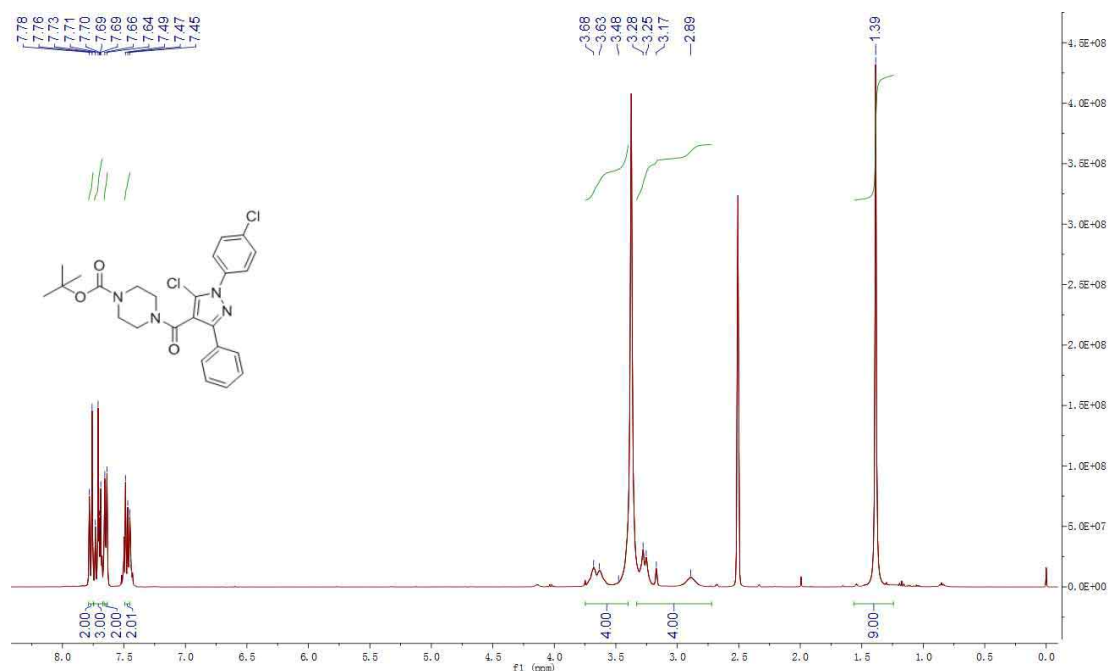

Figure S16  $^1H$  NMR spectrum of title compound **c-6**

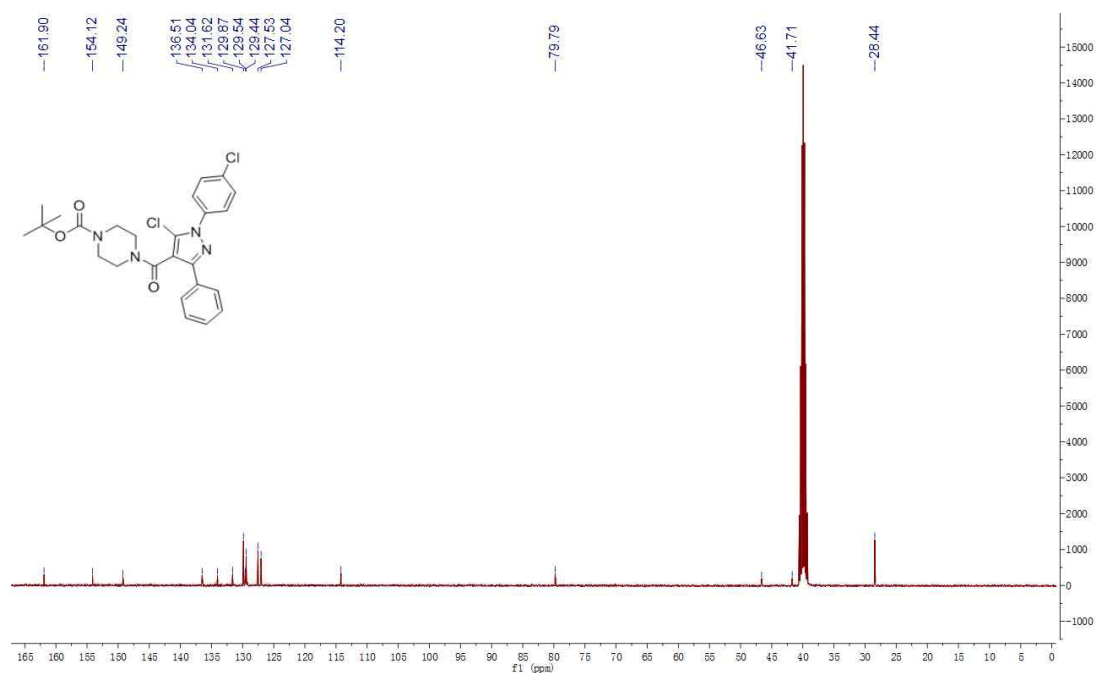

**Figure S17** <sup>13</sup>C NMR spectrum of title compound **c-6**

12 #55 RT: 0.54 AV: 1 NL: 3.17E+007  
T: FTMS + p ESI Full ms [100.0000-1300.0000]

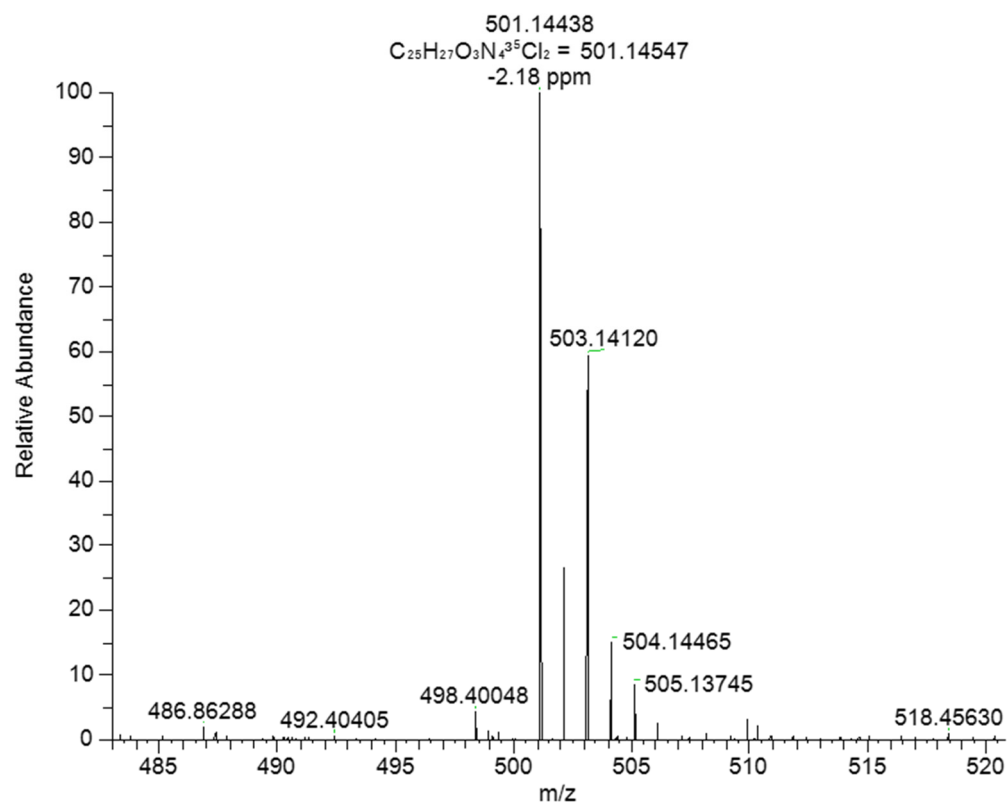

**Figure S18** HRMS spectrum of title compound **c-6**

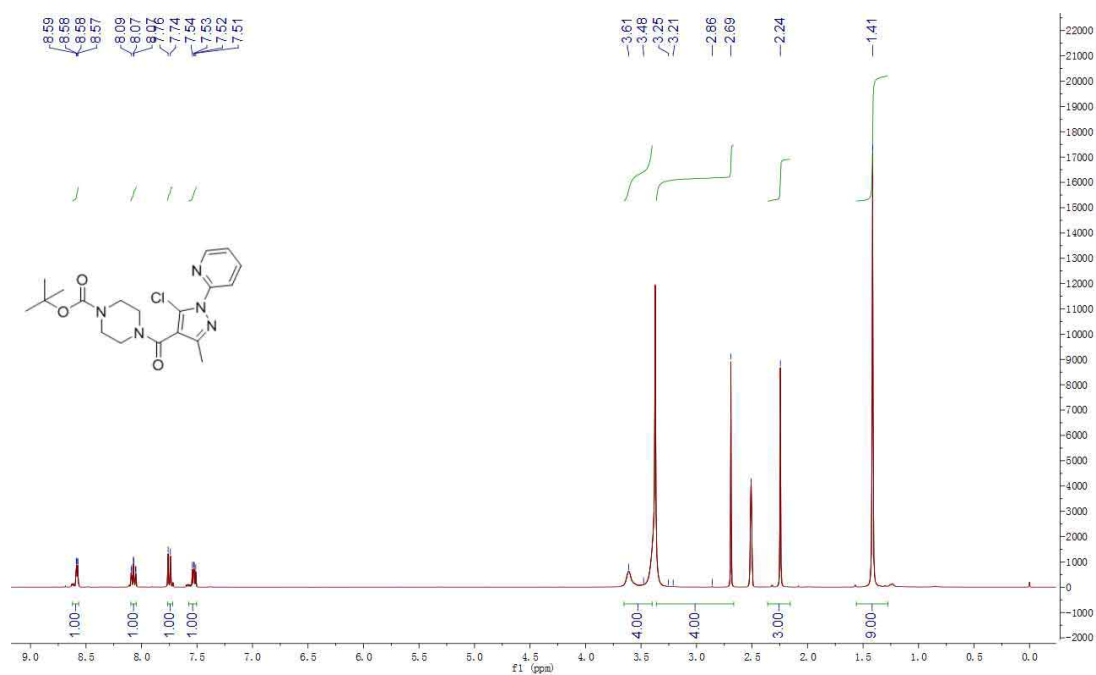

**Figure S19** <sup>1</sup>H NMR spectrum of title compound **c-7**

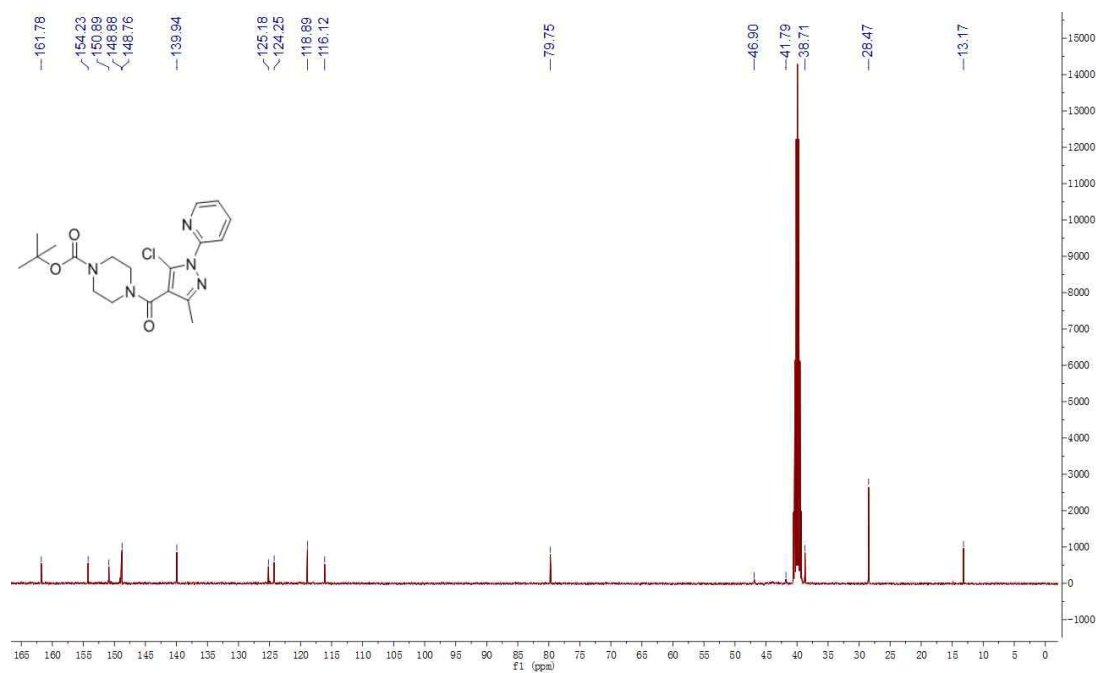

**Figure S20** <sup>13</sup>C NMR spectrum of title compound **c-7**

Mass spectrum of compound 10. The x-axis represents the mass-to-charge ratio ( $m/z$ ) from 402 to 412. The y-axis represents the relative abundance from 0 to 100. The base peak is at  $m/z$  406.16251. Other labeled peaks include  $m/z$  404.09549, 405.80511, 408.15930, and 409.16306. The chemical formula  $C_{19}H_{25}O_3N_5^{35}Cl$  and a value of -3.79 ppm are also displayed.

| $m/z$     | Relative Abundance (%) |
|-----------|------------------------|
| 404.09549 | ~2                     |
| 405.80511 | ~10                    |
| 406.16251 | 100                    |
| 408.15930 | ~32                    |
| 409.16306 | ~5                     |

CC(C)(C)OC(=O)N1CCN(C1C(=O)c2nc3ccccc3n2Cl)c3ccccc3

<sup>1</sup>H NMR spectrum (CDCl<sub>3</sub>) of compound 10. The x-axis represents the chemical shift in ppm (f1), ranging from 0.0 to 9.0. The y-axis represents the intensity in arbitrary units, ranging from -2000 to 3000. The spectrum shows several peaks corresponding to the structure of 10, including the tert-butyl group (0.9 ppm, 9H), the methoxy group (3.7 ppm, 3H), and aromatic signals (7.4-8.6 ppm). Integration values are provided for several peak groups.

| Chemical Shift (ppm) | Integration            |
|----------------------|------------------------|
| 0.9                  | 9.00                   |
| 3.7                  | 3.00                   |
| 7.4-8.6              | 1.00, 1.00, 2.00, 3.00 |

S18

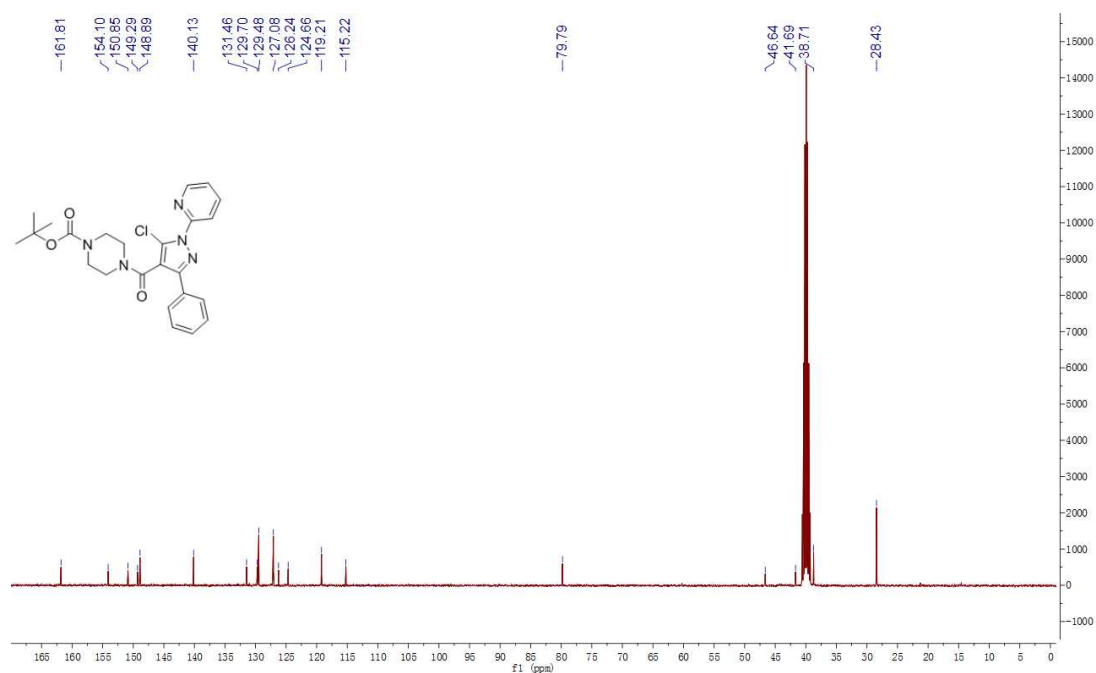

**Figure S23** <sup>13</sup>C NMR spectrum of title compound c-8

15 #39 RT: 0.38 AV: 1 NL: 1.09E+008  
T: FTMS + p ESI Full ms [100.0000-1300.0000]

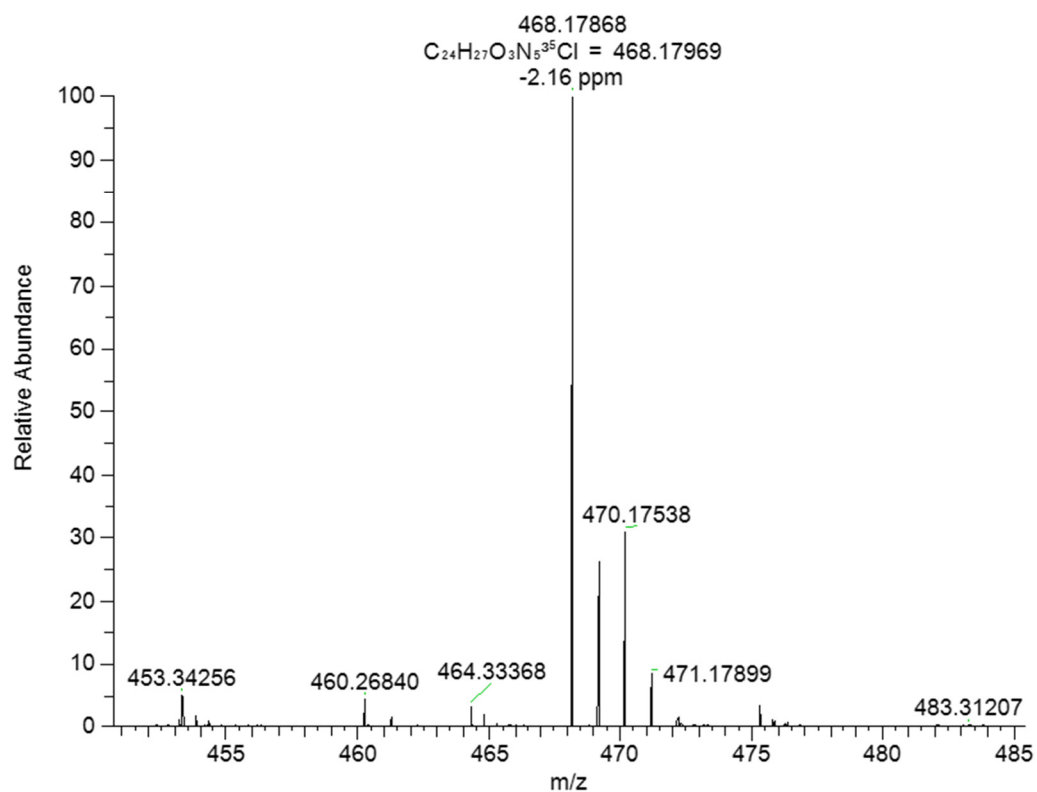

**Figure S24** HRMS spectrum of title compound c-8

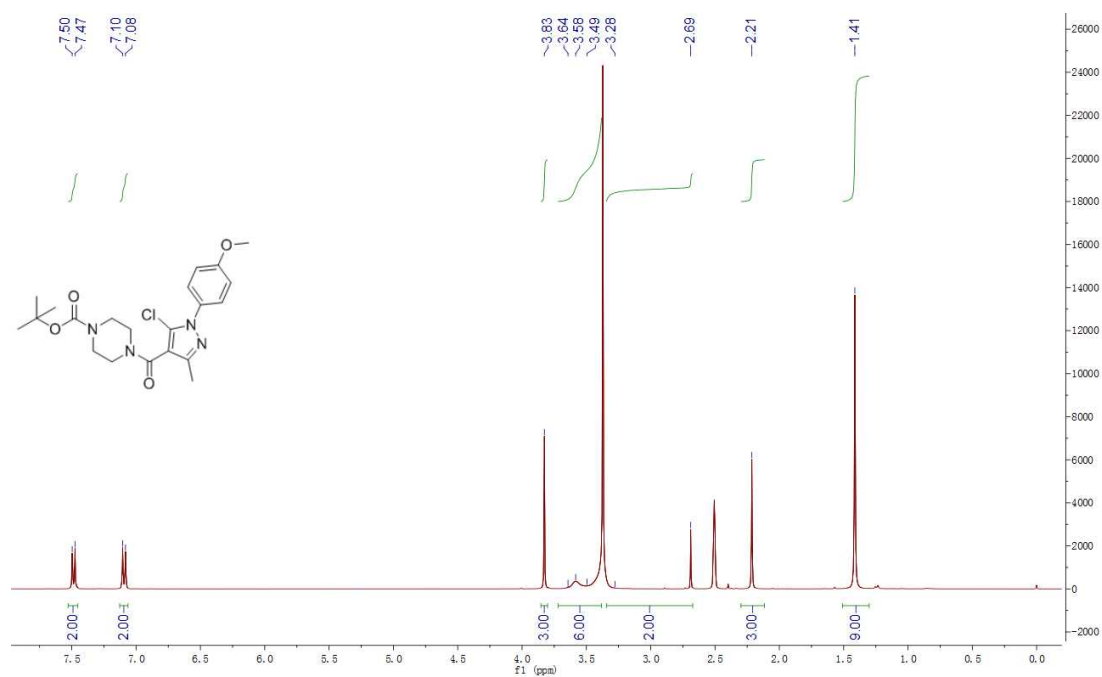

**Figure S25** <sup>1</sup>H NMR spectrum of title compound **c-9**

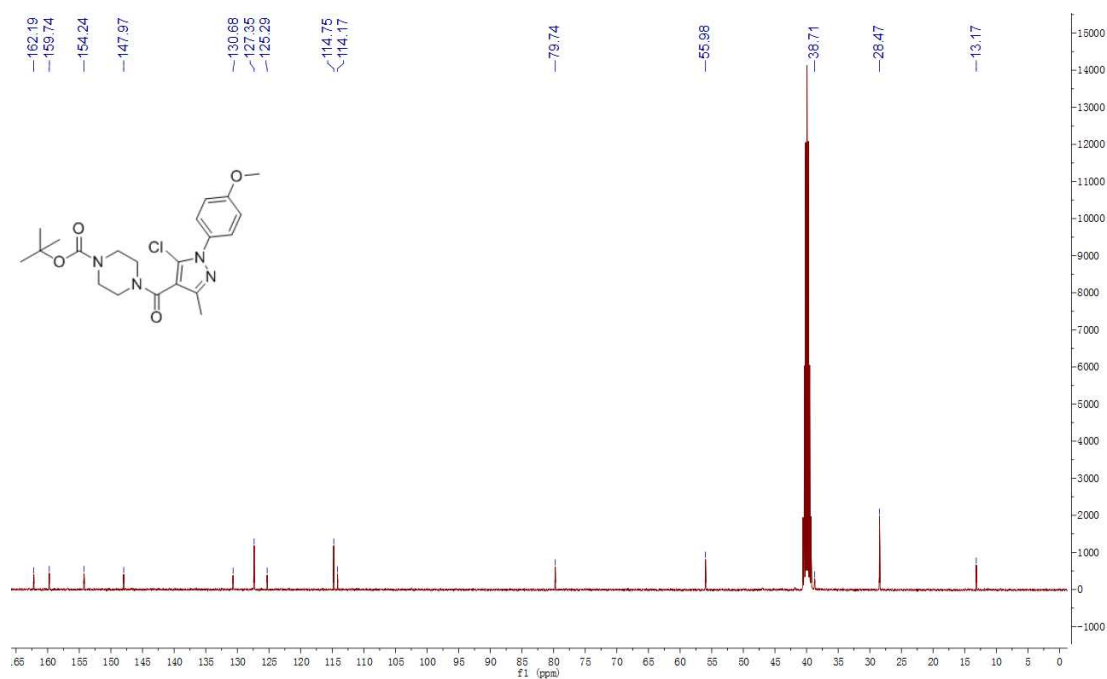

**Figure S26** <sup>13</sup>C NMR spectrum of title compound **c-9**



16 #37 RT: 0.36 AV: 1 NL: 1.12E+008  
T: FTMS + p ESI Full ms [100.0000-1300.0000]

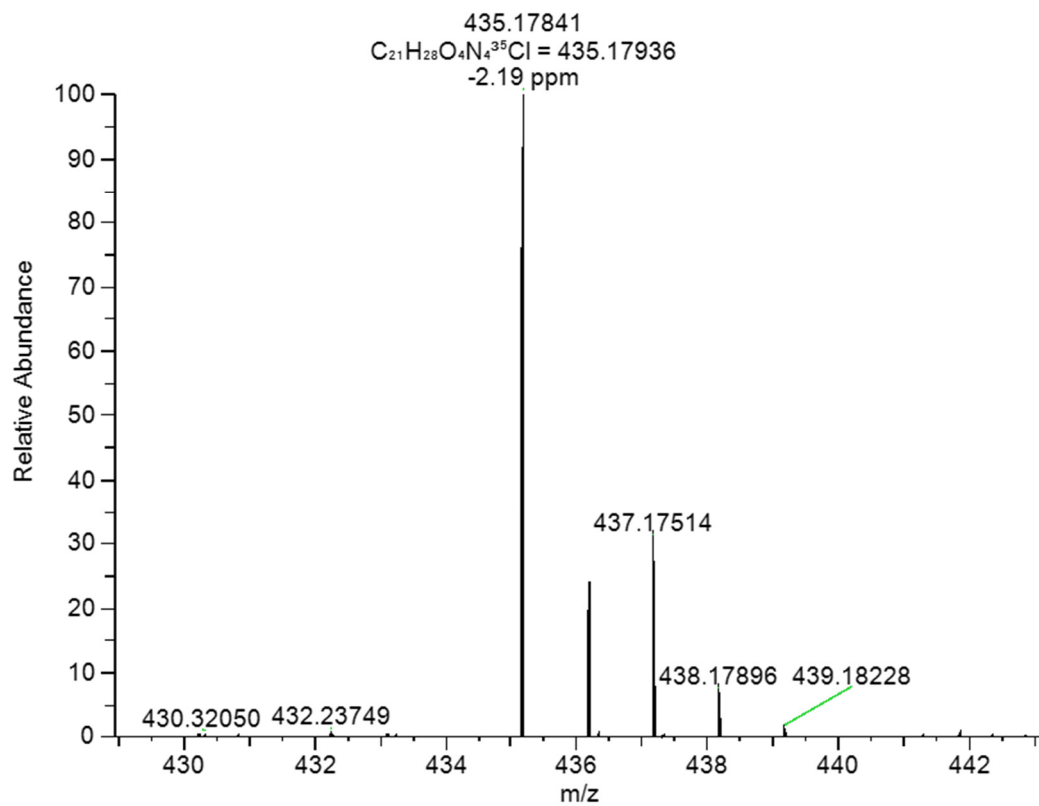

**Figure S27** HRMS spectrum of title compound **c-9**

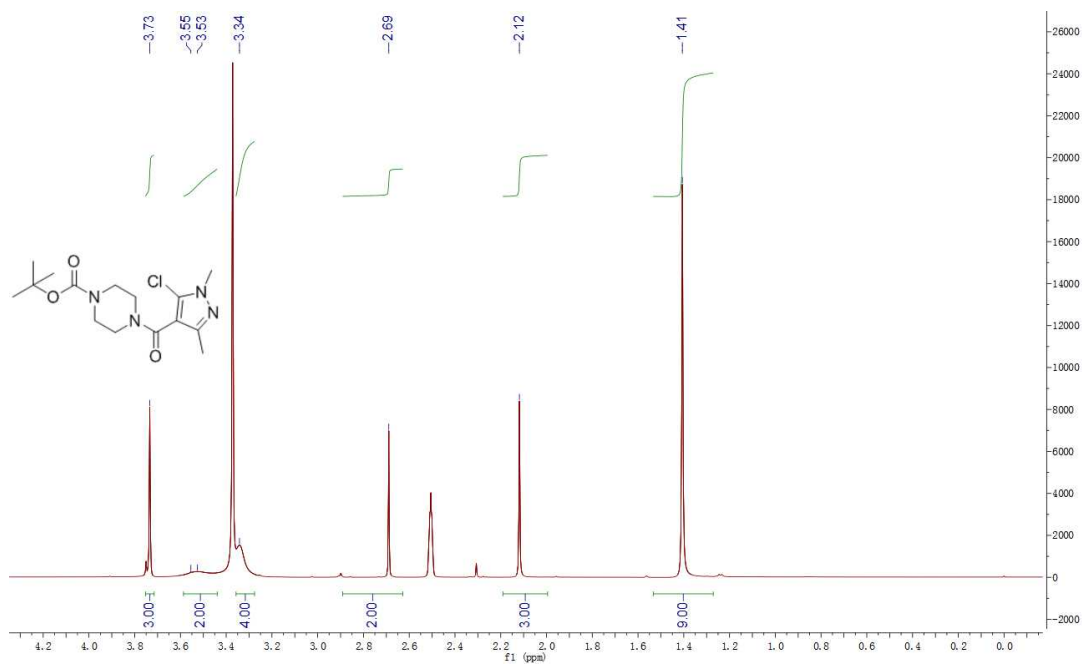

**Figure S28**  $^1H$  NMR spectrum of title compound **c-10**

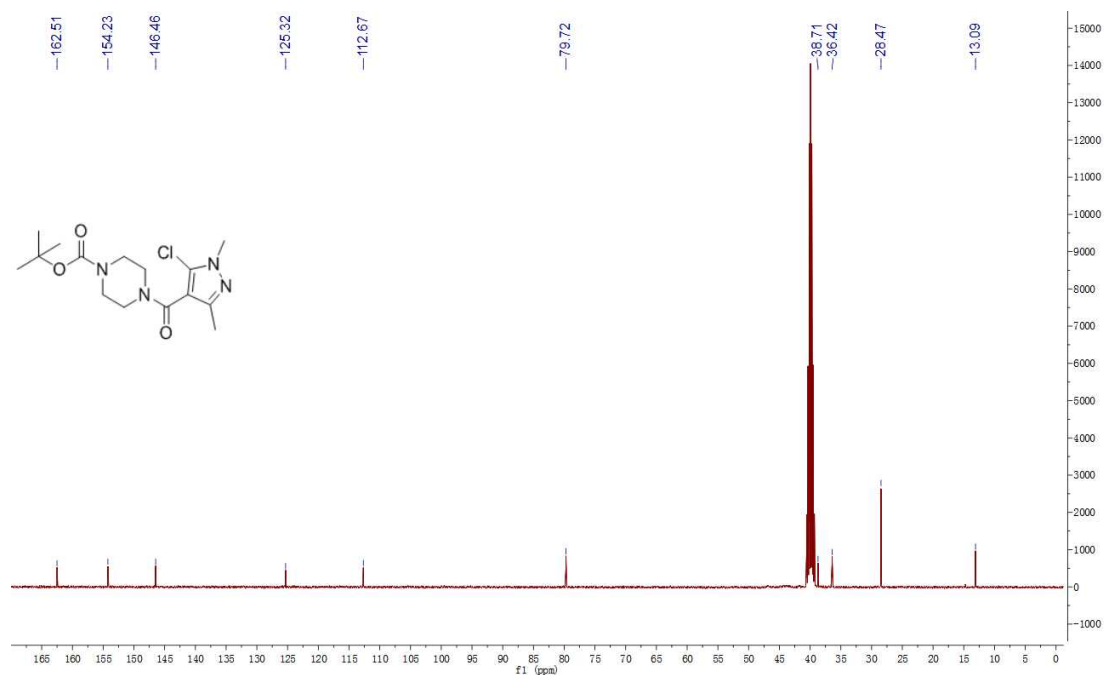

**Figure S29** <sup>13</sup>C NMR spectrum of title compound **c-10**

17 #31 RT: 0.31 AV: 1 NL: 3.27E+005  
T: FTMS + p ESI Full ms [100.0000-1300.0000]

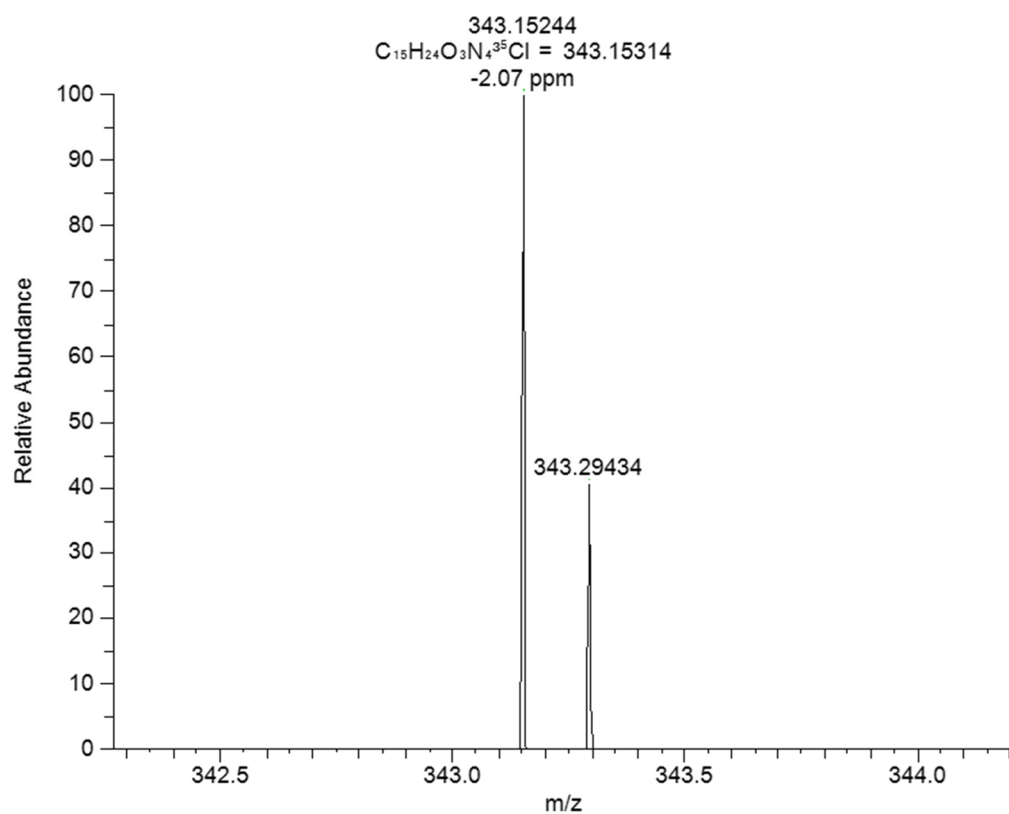

**Figure S30** HRMS spectrum of title compound **c-10**

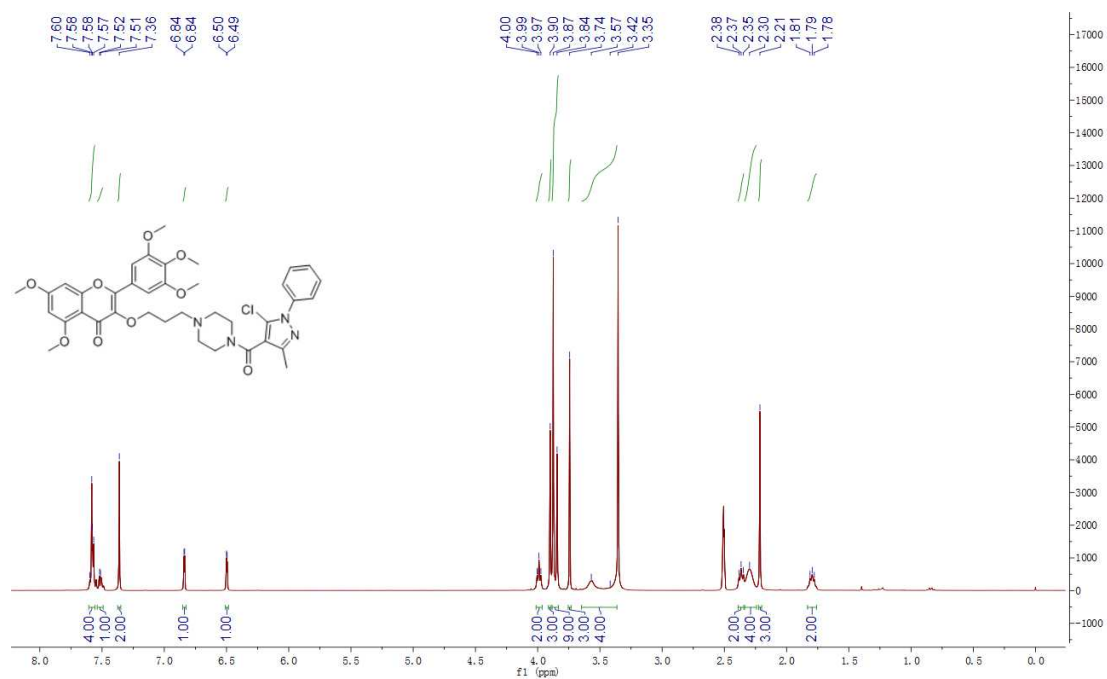

**Figure S31**  $^1\text{H}$  NMR spectrum of title compound D1

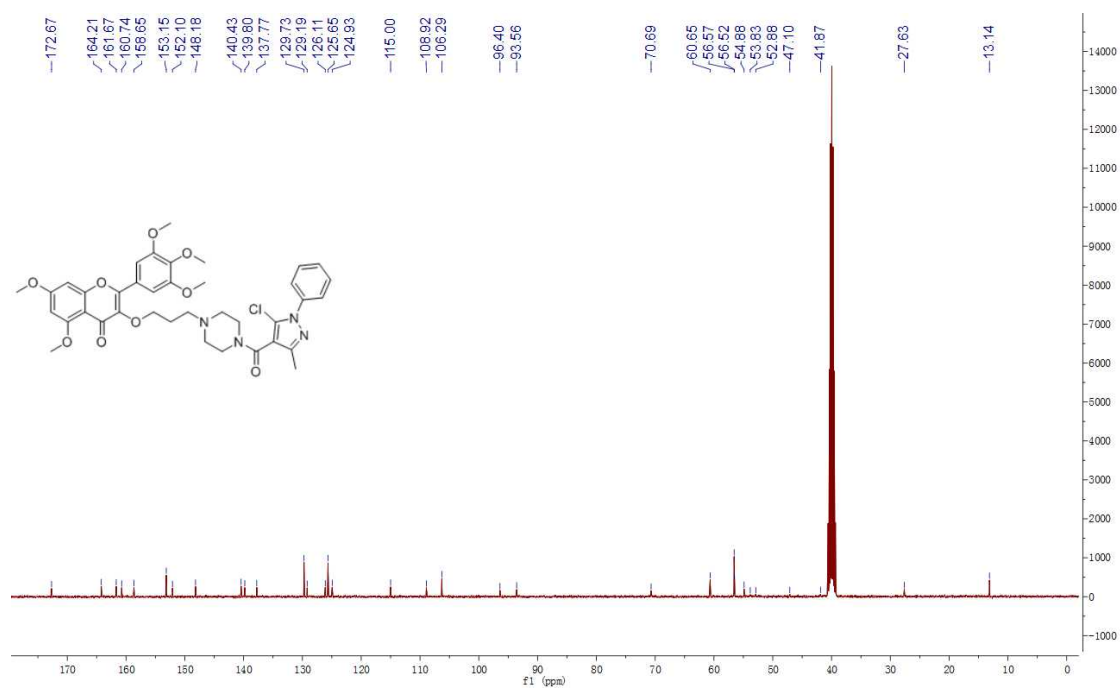

**Figure S32**  $^{13}\text{C}$  NMR spectrum of title compound D1

D1 #63 RT: 0.64 AV: 1 NL: 6.61E+007  
T: FTMS + p ESI Full ms [150.0000-2200.0000]

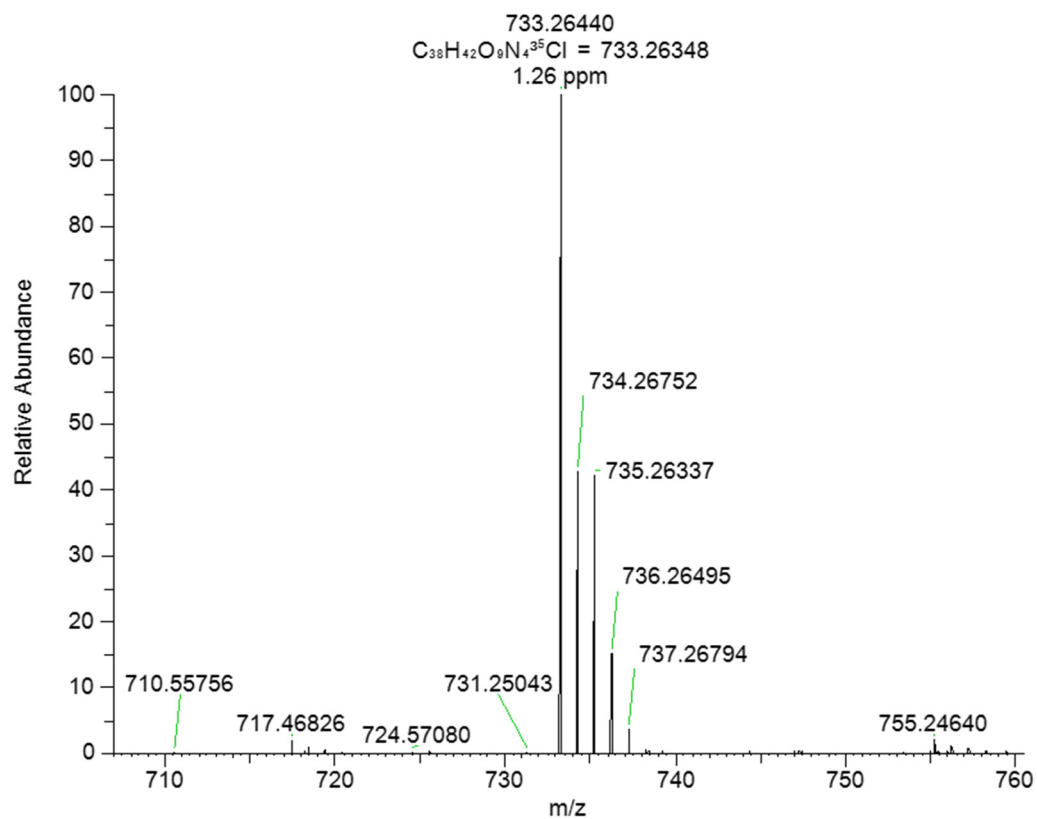

Figure S33 HRMS spectrum of title compound D1

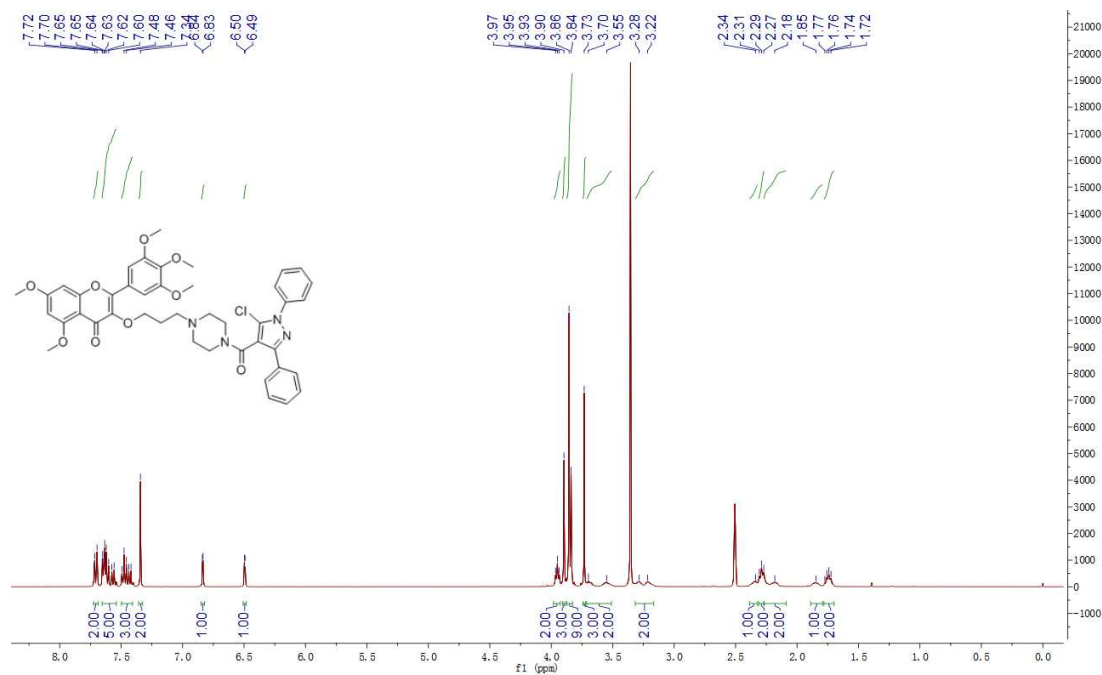

Figure S34  $^1H$  NMR spectrum of title compound D2

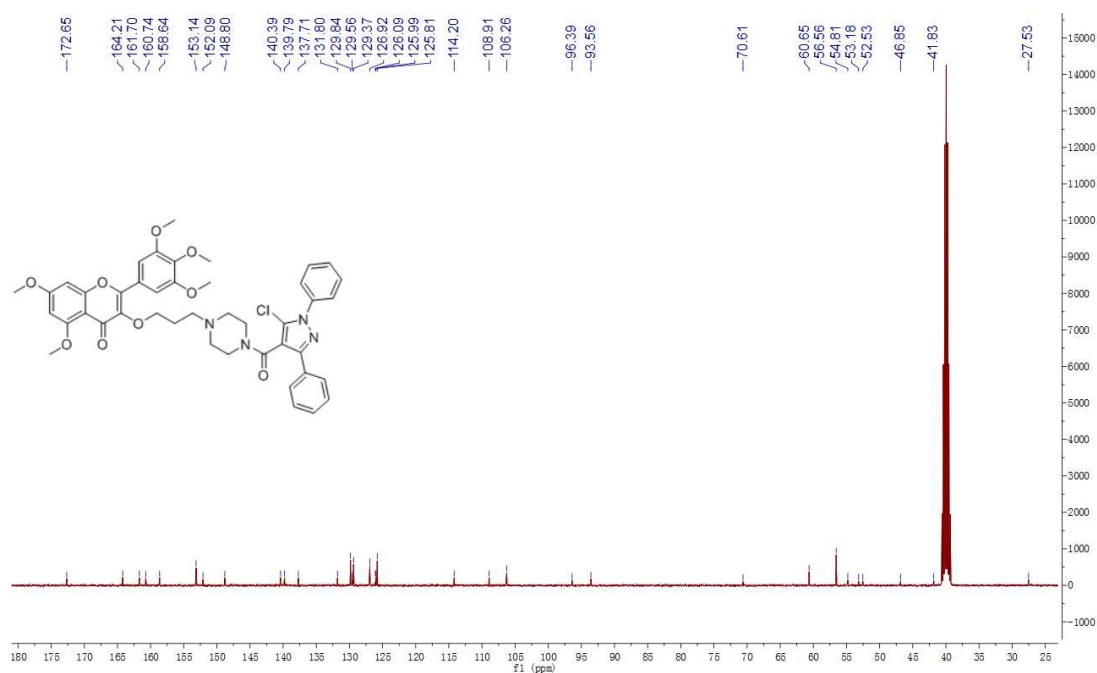

**Figure S35**  $^{13}\text{C}$  NMR spectrum of title compound D2

D2 #51 RT: 0.49 AV: 1 NL: 1.69E+008  
T: FTMS + p ESI Full ms [100.0000-1300.0000]

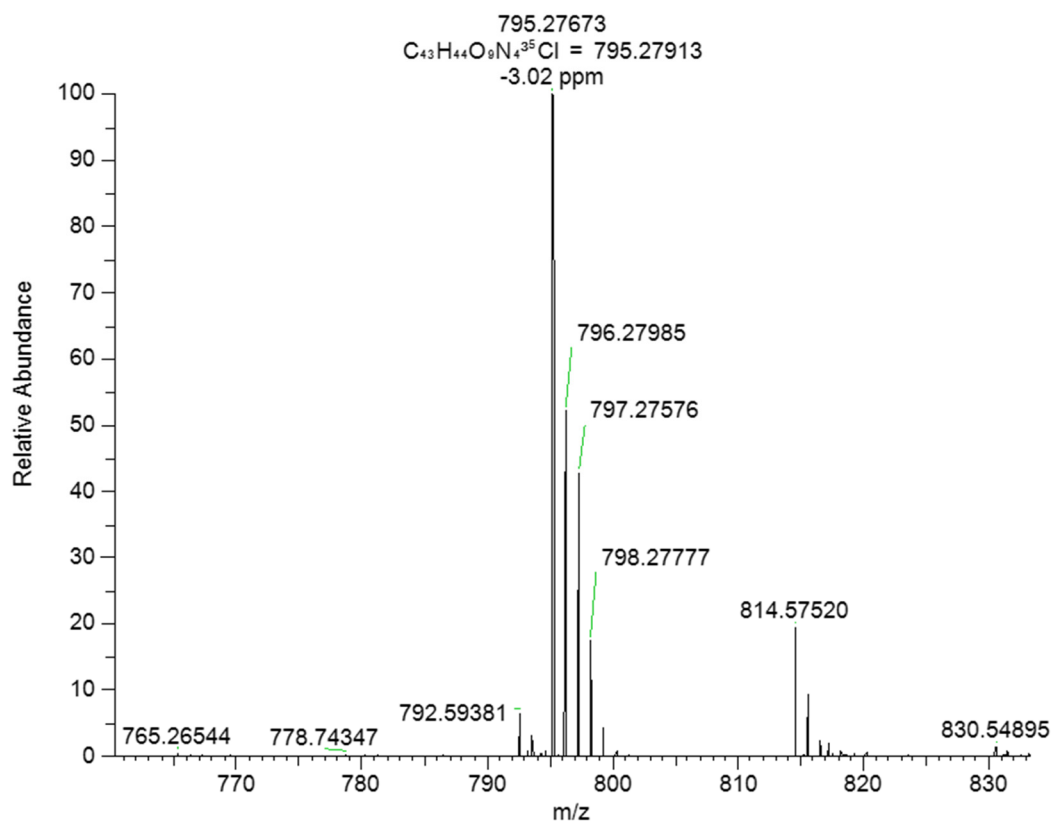

**Figure S36** HRMS spectrum of title compound D2

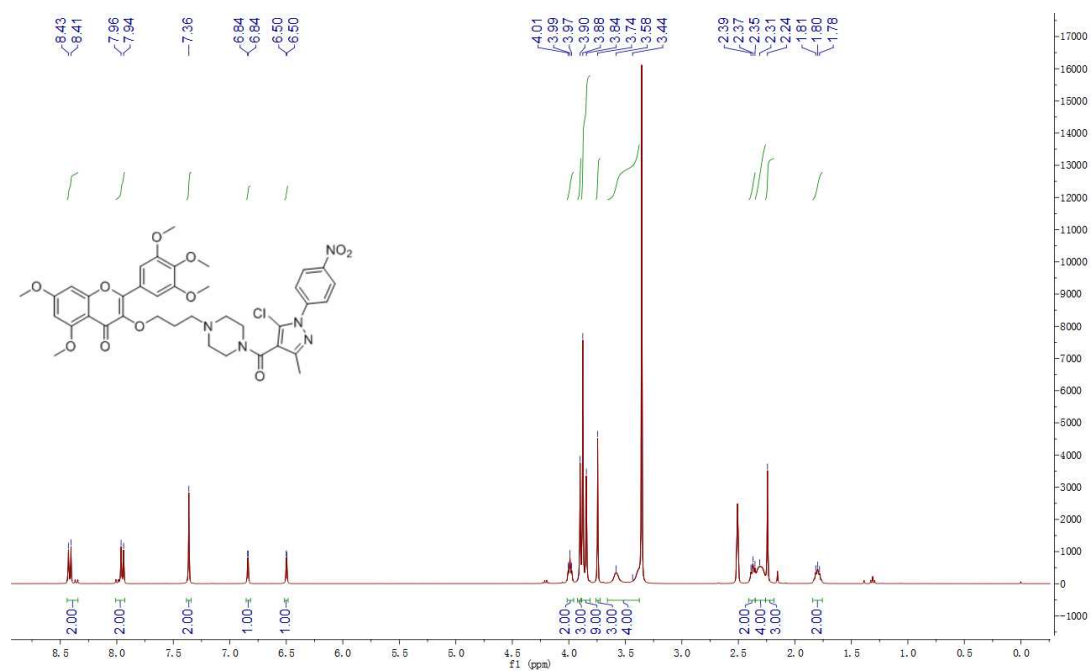

Figure S37 <sup>1</sup>H NMR spectrum of title compound D3

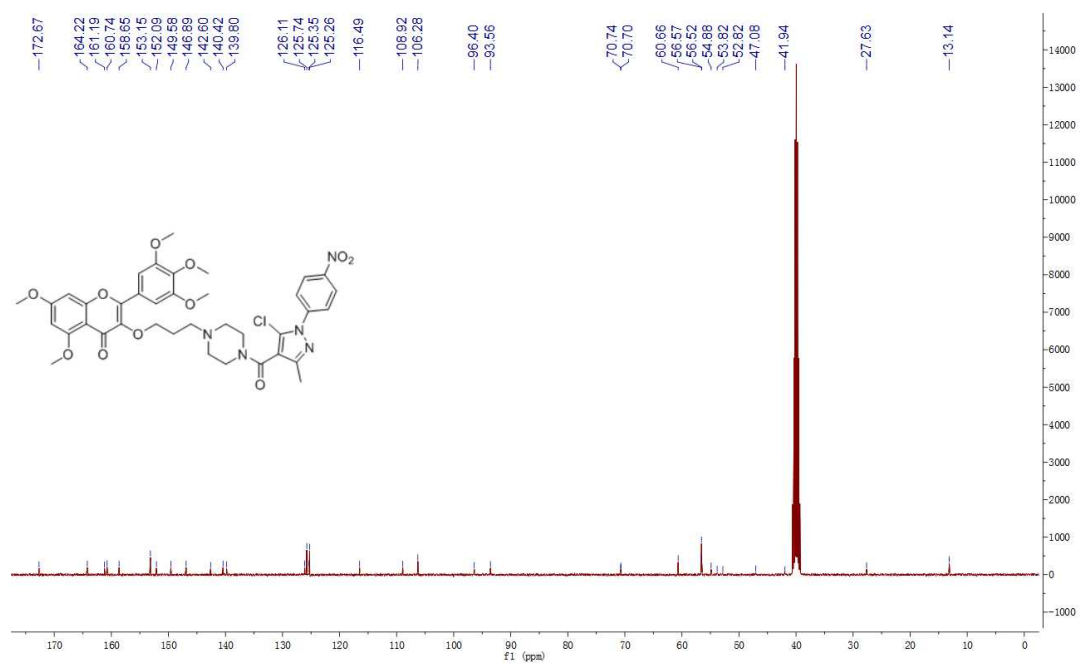

D3 #57 RT: 0.58 AV: 1 NL: 2.00E+007  
T: FTMS + p ESI Full ms [150.0000-2200.0000]

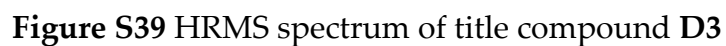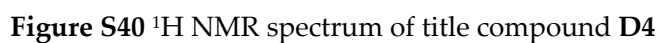

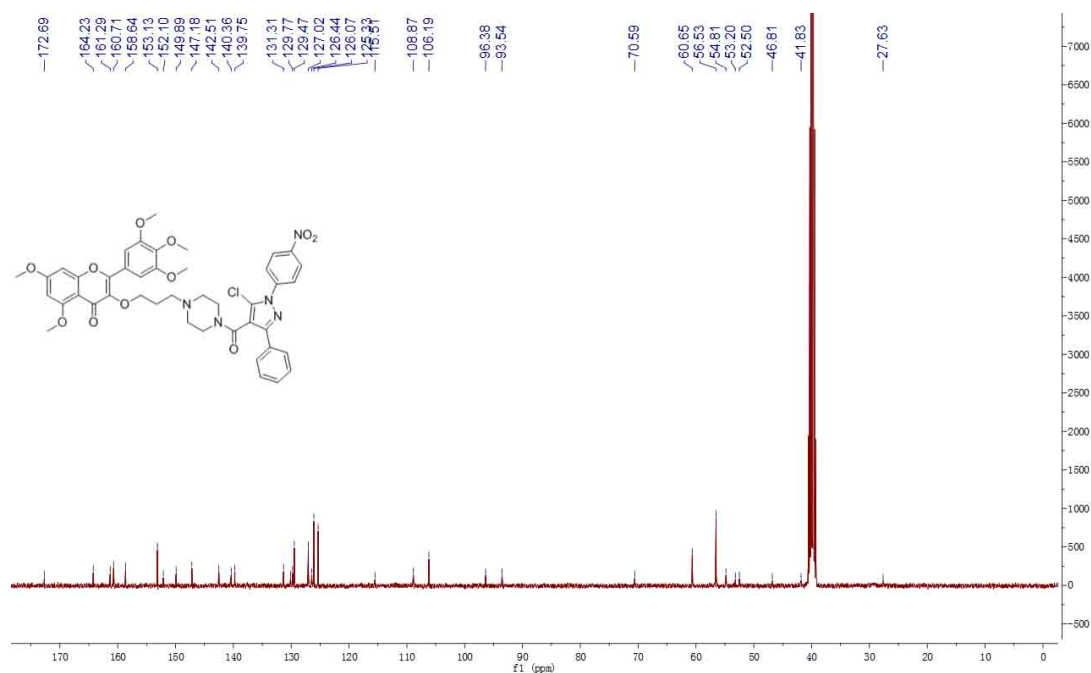

**Figure S41** <sup>13</sup>C NMR spectrum of title compound D4

D4 #55 RT: 0.53 AV: 1 NL: 6.11E+007  
T: FTMS + p ESI Full ms [100.0000-1300.0000]

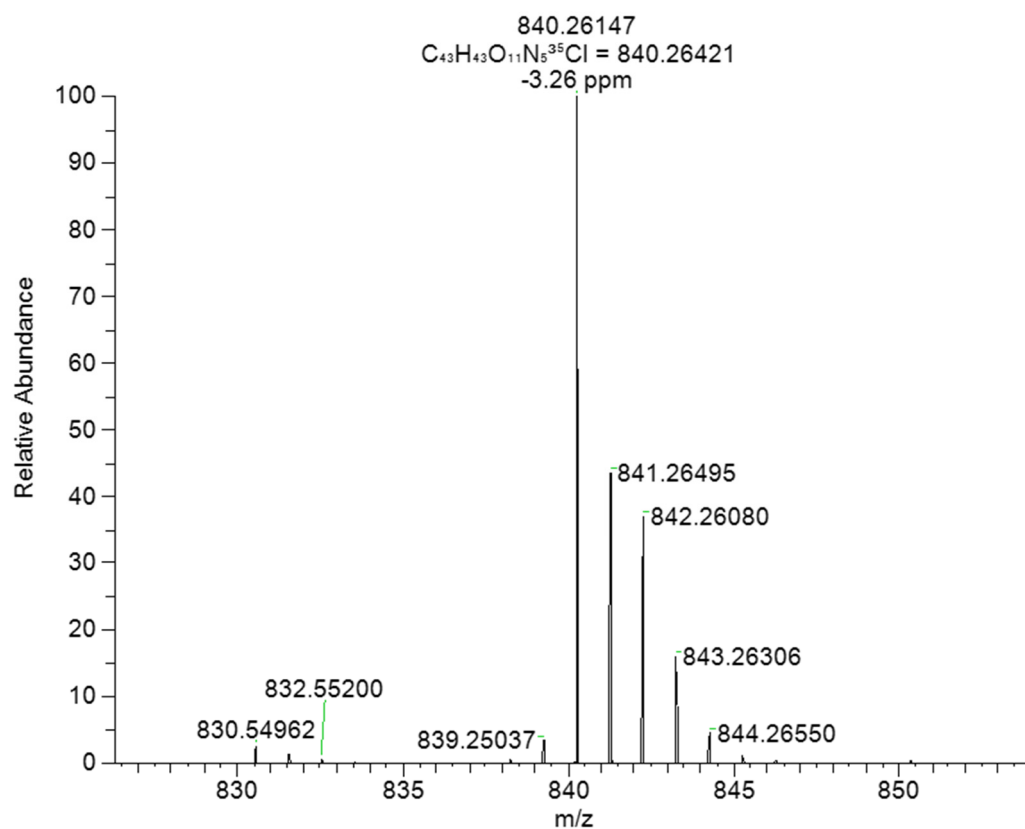

**Figure S42** HRMS spectrum of title compound D4



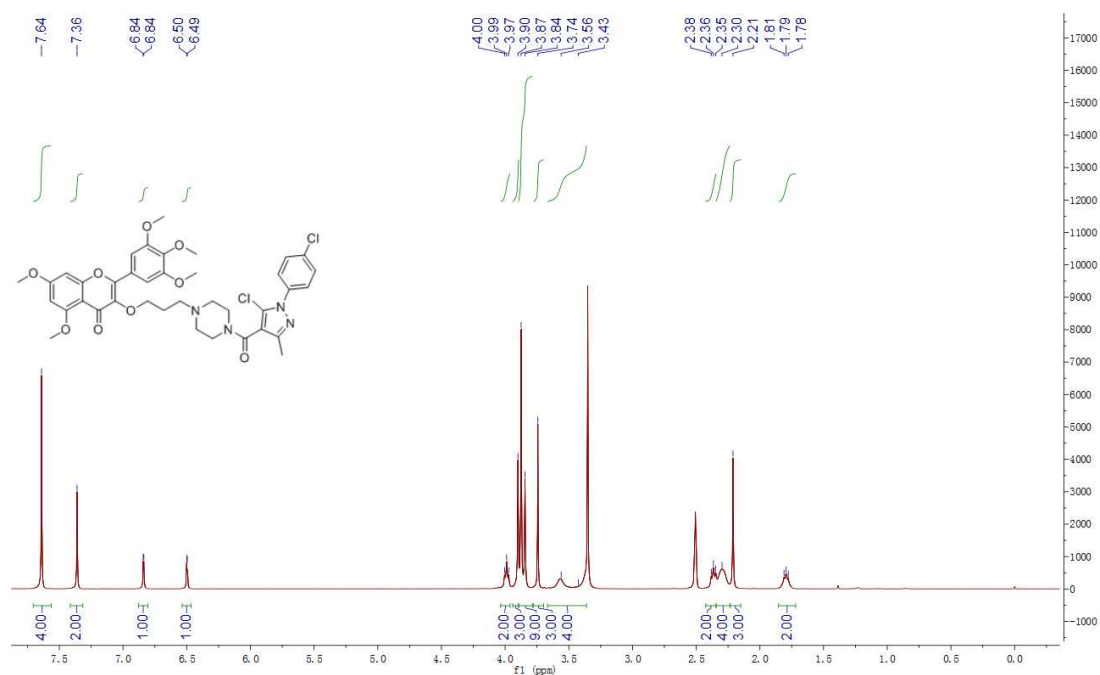

**Figure S43** <sup>1</sup>H NMR spectrum of title compound D5

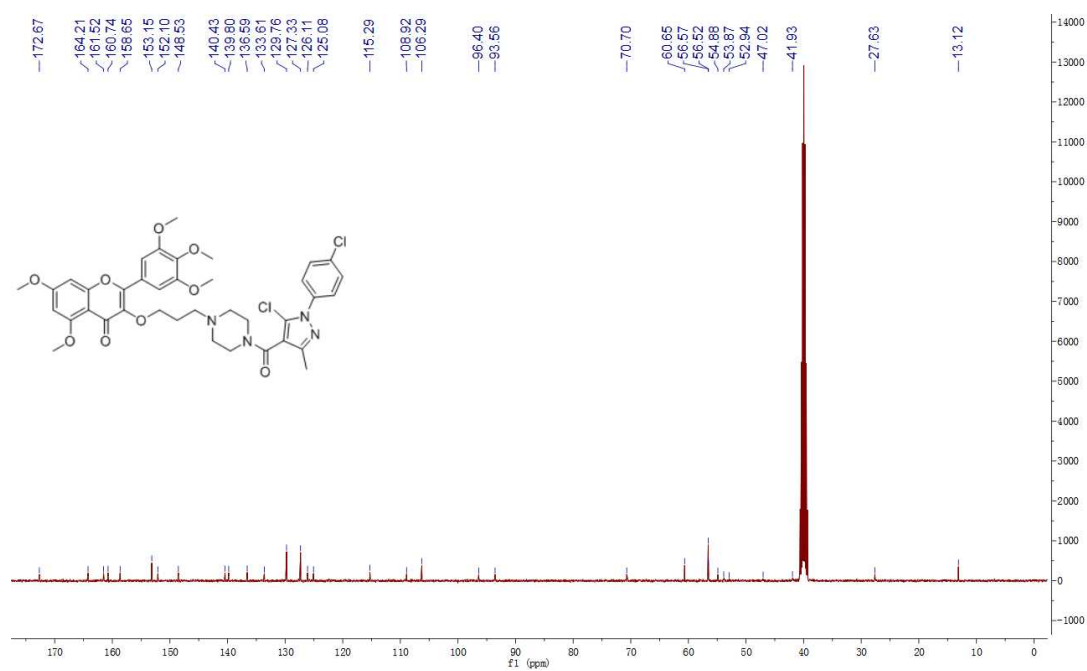

**Figure S44** <sup>13</sup>C NMR spectrum of title compound D5

D5 #65 RT: 0.66 AV: 1 NL: 1.63E+007  
T: FTMS + p ESI Full ms [150.0000-2200.0000]

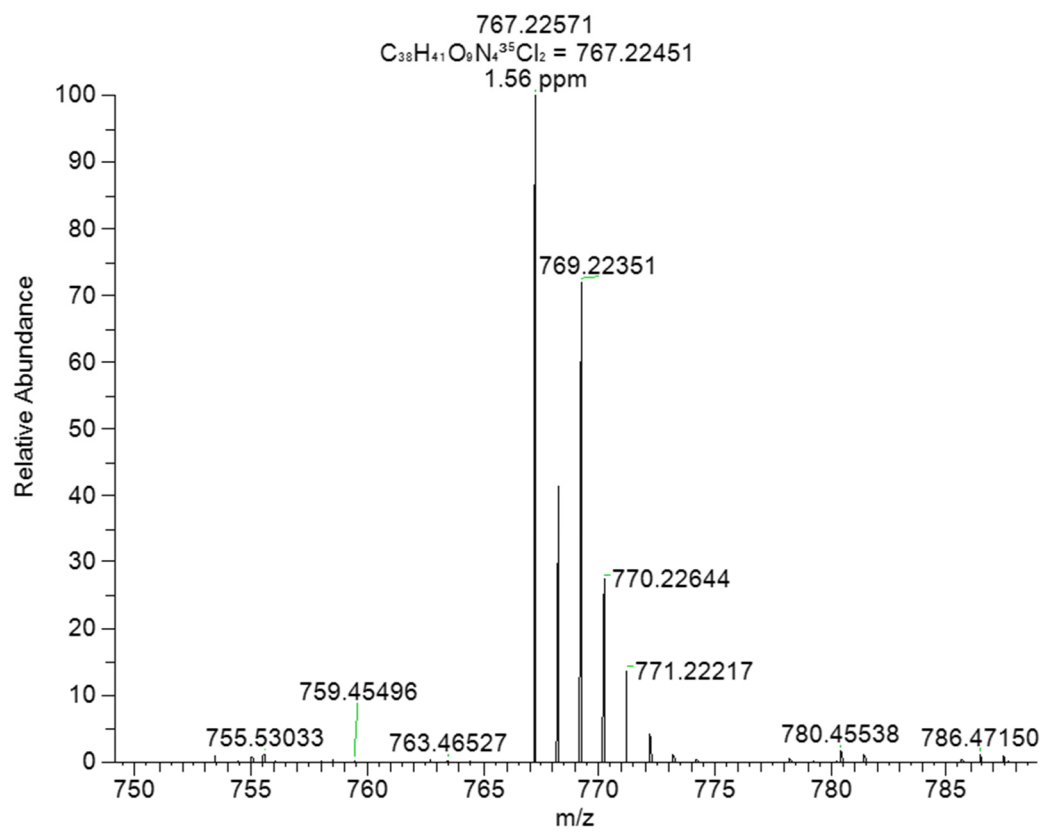

Figure S45 HRMS spectrum of title compound D5

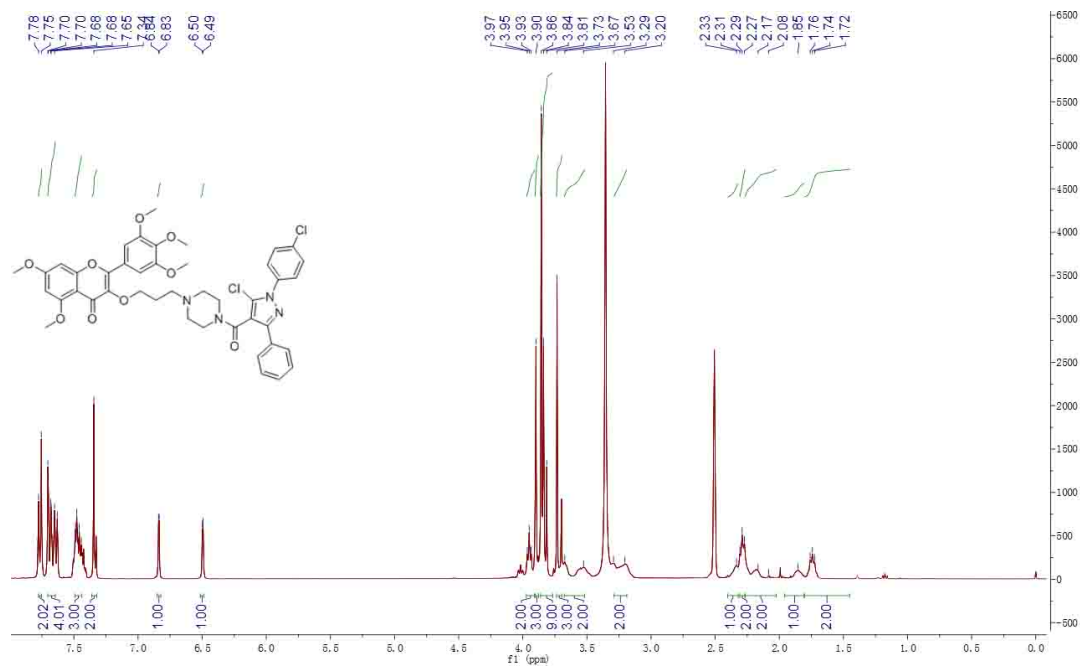

Figure S46  $^1H$  NMR spectrum of title compound D6

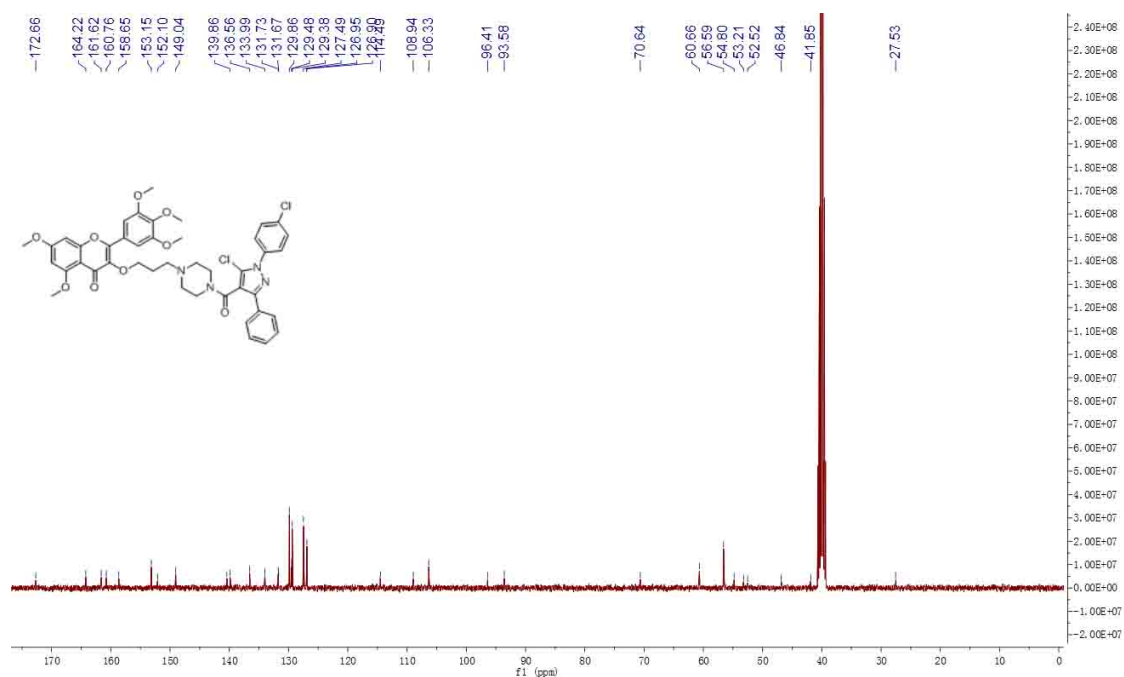

**Figure S47**  $^{13}\text{C}$  NMR spectrum of title compound D6

D6 #75 RT: 0.75 AV: 1 NL: 2.53E+007  
T: FTMS + p ESI Full ms [150.0000-2200.0000]

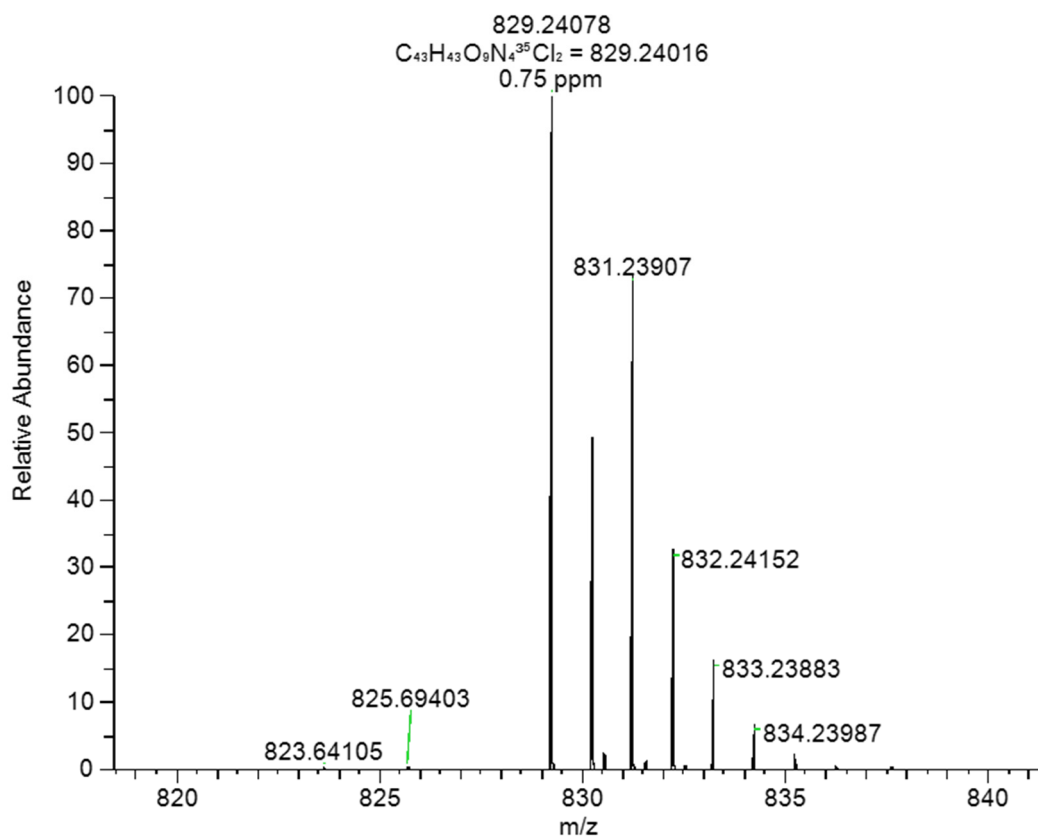

**Figure S48** HRMS spectrum of title compound D6

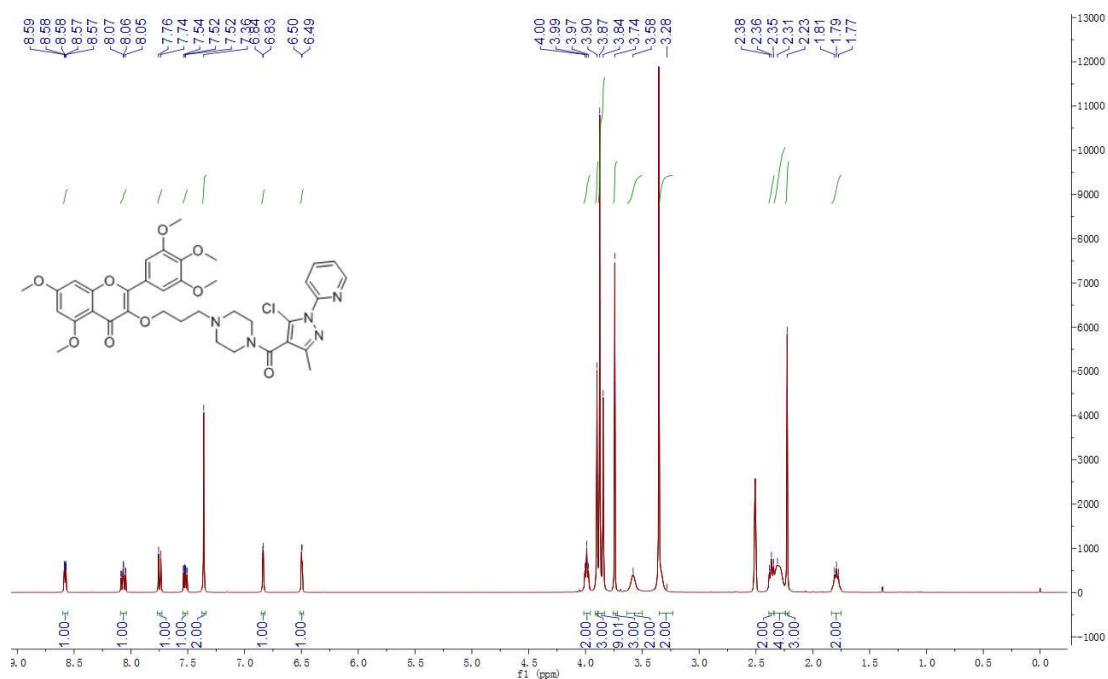

**Figure S49** <sup>1</sup>H NMR spectrum of title compound D7

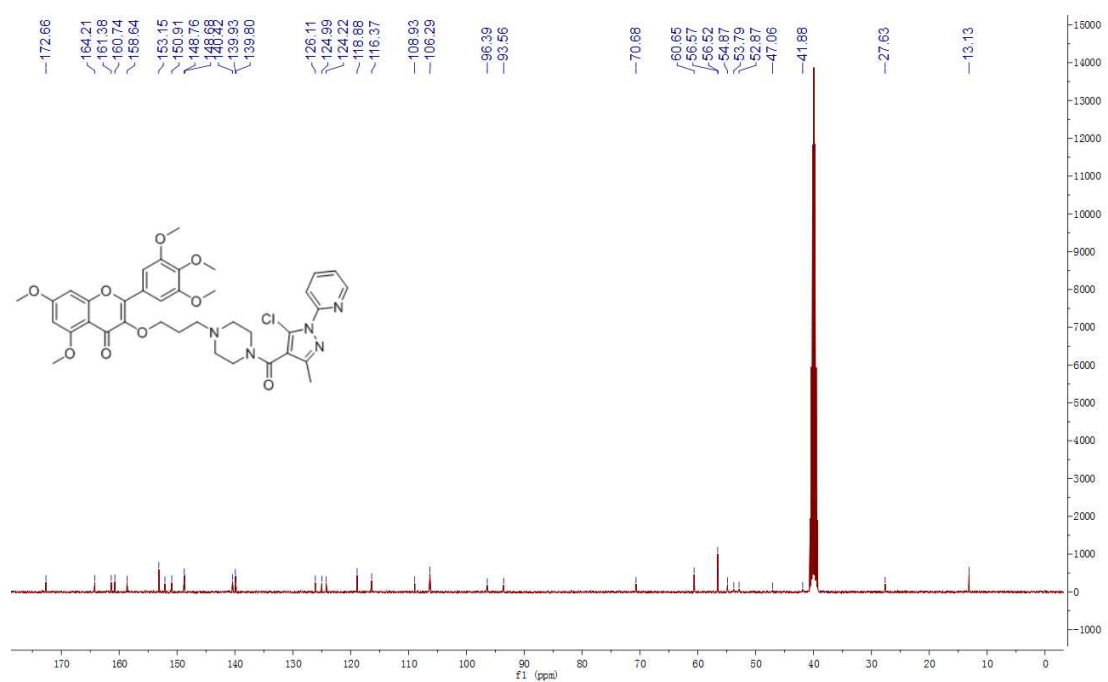

**Figure S50** <sup>13</sup>C NMR spectrum of title compound D7

Mass spectrum of compound 10. The x-axis represents the mass-to-charge ratio ( $m/z$ ) and the y-axis represents the relative abundance. The base peak is at  $m/z$  734.25623. Other significant peaks are labeled at  $m/z$  735.25946, 736.25452, 737.25708, 738.25995, 729.55597, and 732.24023. The chemical formula  $C_{37}H_{41}O_9N_5^{35}Cl$  and a value of -3.41 ppm are also displayed.

| $m/z$     | Relative Abundance (approx.) |
|-----------|------------------------------|
| 729.55597 | 1                            |
| 732.24023 | 1                            |
| 734.25623 | 100                          |
| 735.25946 | 40                           |
| 736.25452 | 38                           |
| 737.25708 | 15                           |
| 738.25995 | 3                            |

Chemical structure of compound 10 is shown in the top left. The  $^1\text{H}$  NMR spectrum (CDCl<sub>3</sub>) is displayed below the structure, showing peaks from 0 to 9 ppm. The x-axis is labeled 'f1 (ppm)' and ranges from 9.0 to 0.0. The y-axis is labeled 'Intensity' and ranges from -1000 to 12000. The spectrum includes several multiplets in the aromatic region (6.5-8.7 ppm) and a large multiplet in the aliphatic region (3.2-4.0 ppm). Integration values are provided below the peaks.

S33

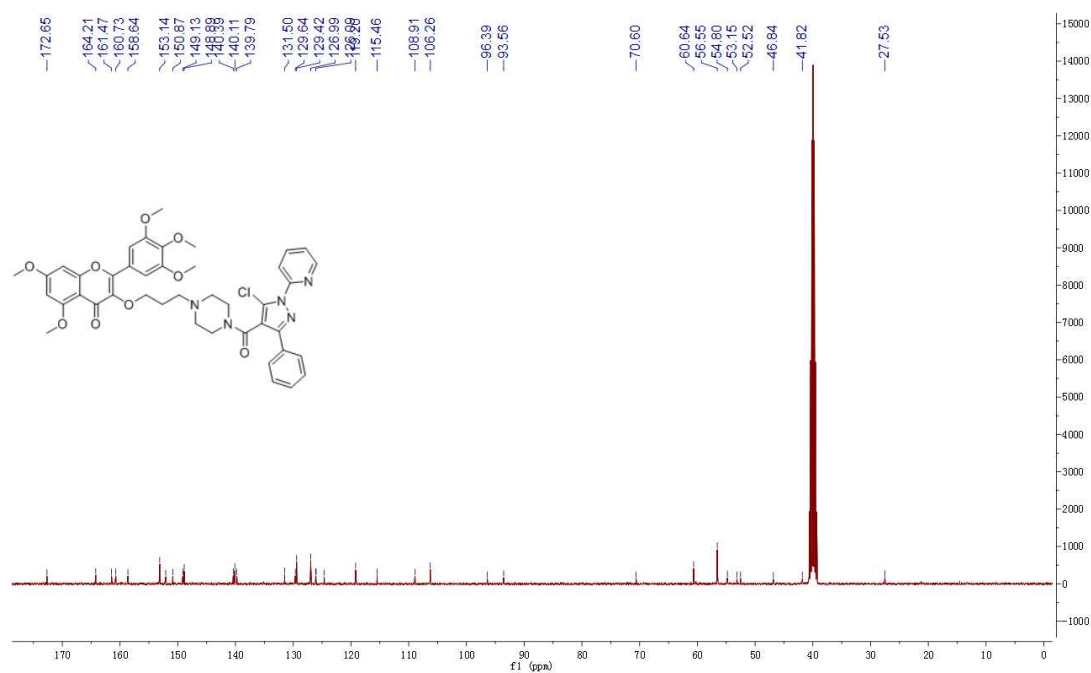

**Figure S53** <sup>13</sup>C NMR spectrum of title compound D8

D8 #49 RT: 0.47 AV: 1 NL: 2.48E+008  
T: FTMS + p ESI Full ms [100.0000-1300.0000]

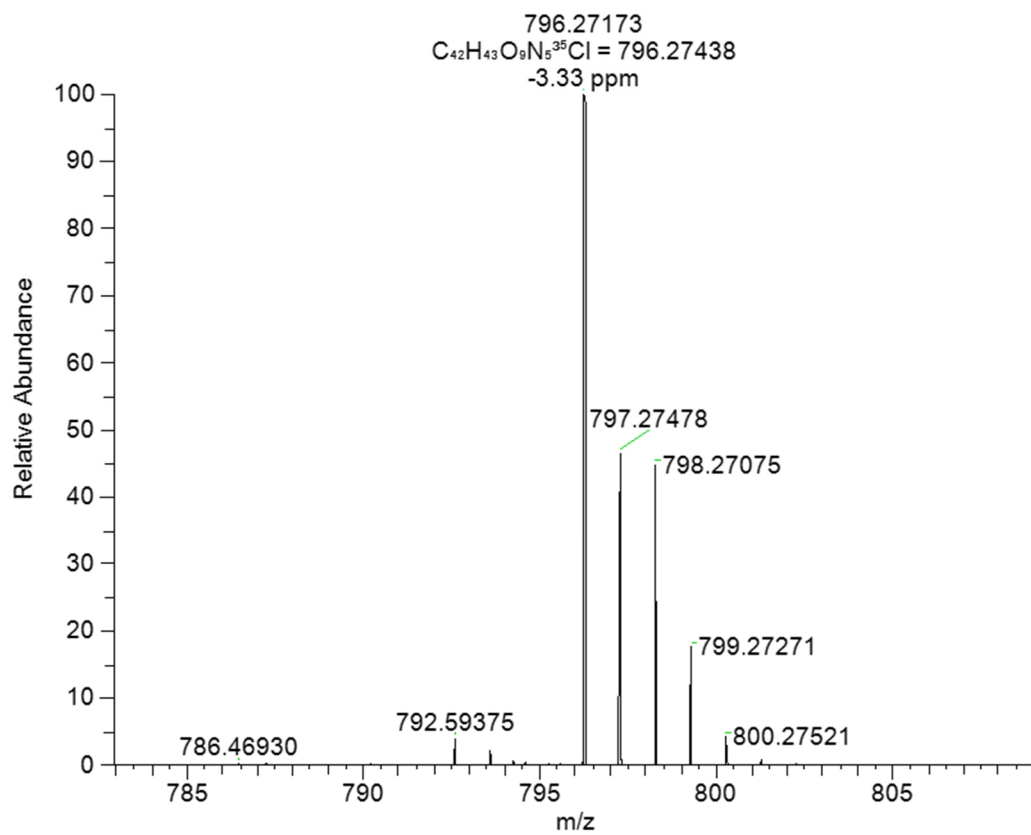

**Figure S54** HRMS spectrum of title compound D8

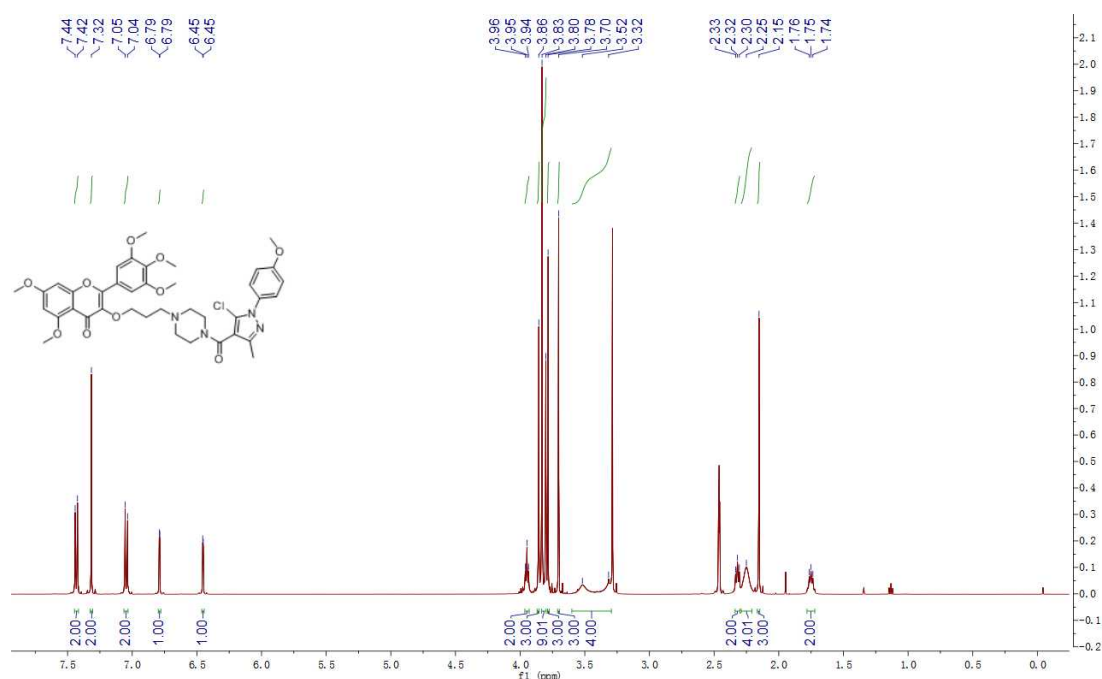

**Figure S55** <sup>1</sup>H NMR spectrum of title compound D9

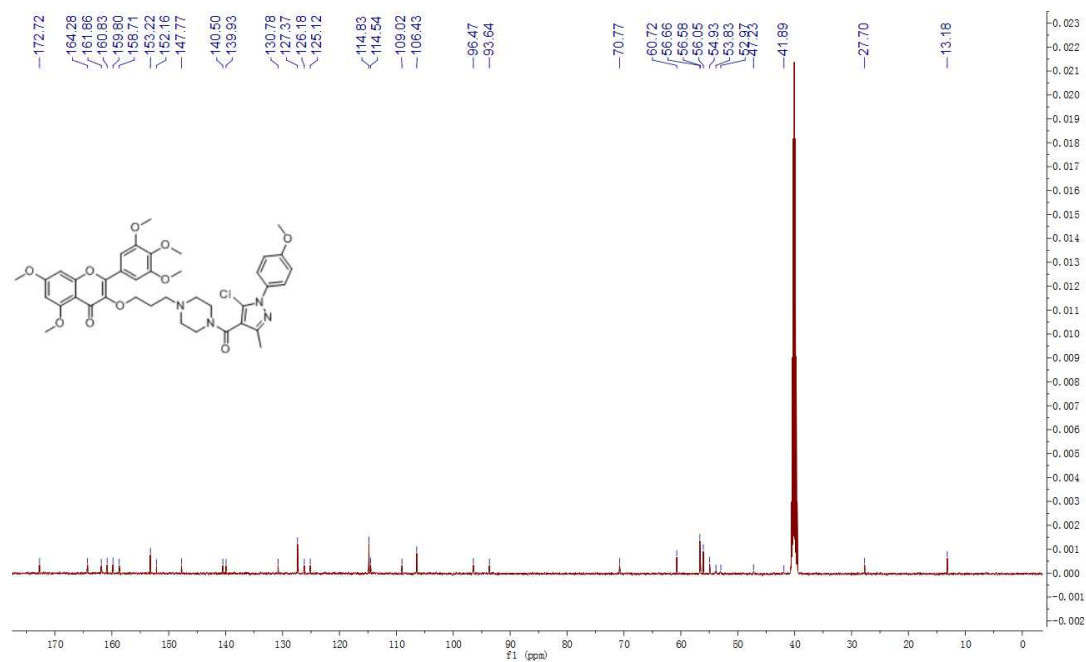

**Figure S56** <sup>13</sup>C NMR spectrum of title compound D9

D9 #41 RT: 0.39 AV: 1 NL: 3.57E+007  
T: FTMS + p ESI Full ms [100.0000-1300.0000]

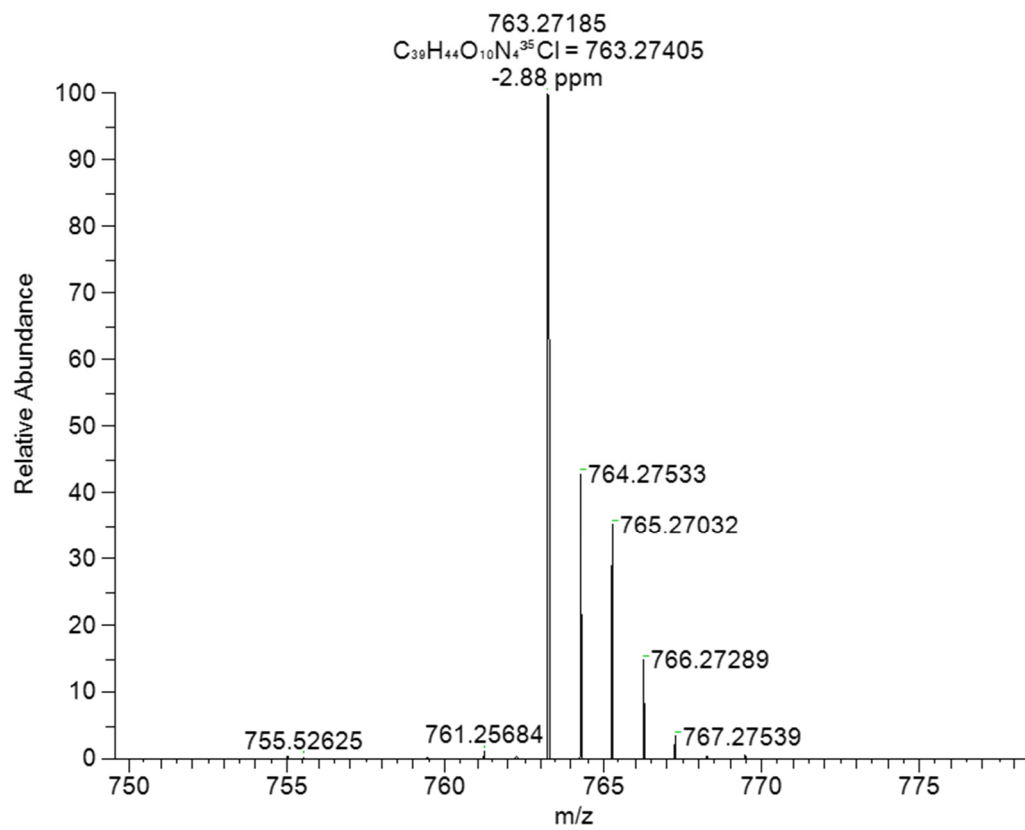

Figure S57 HRMS spectrum of title compound D9

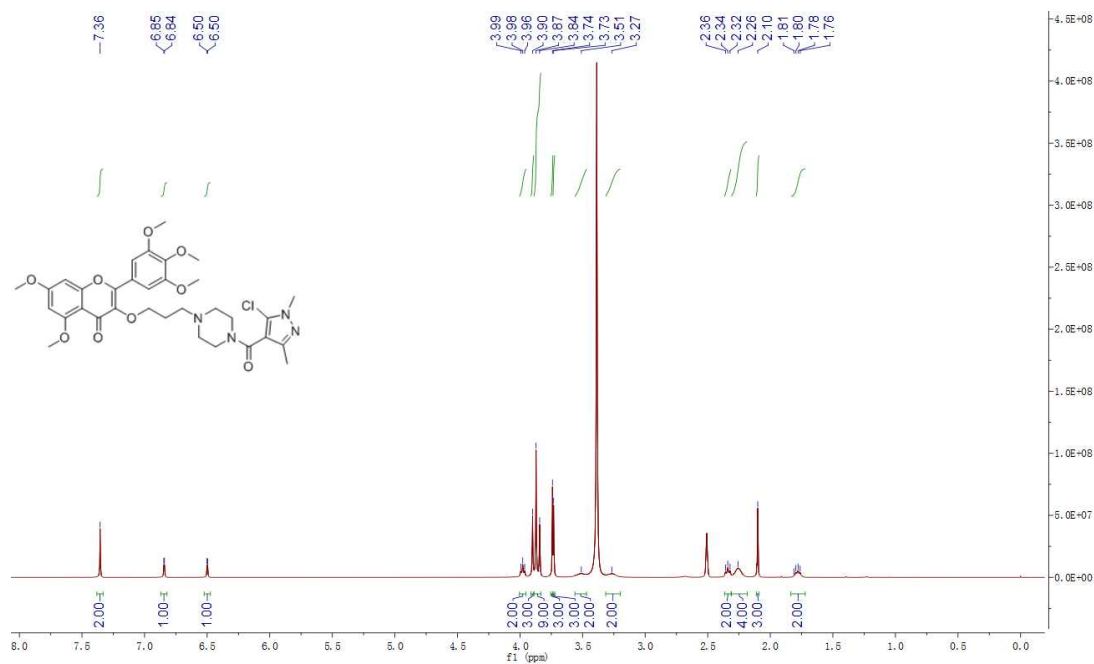

Figure S58  $^1H$  NMR spectrum of title compound D10



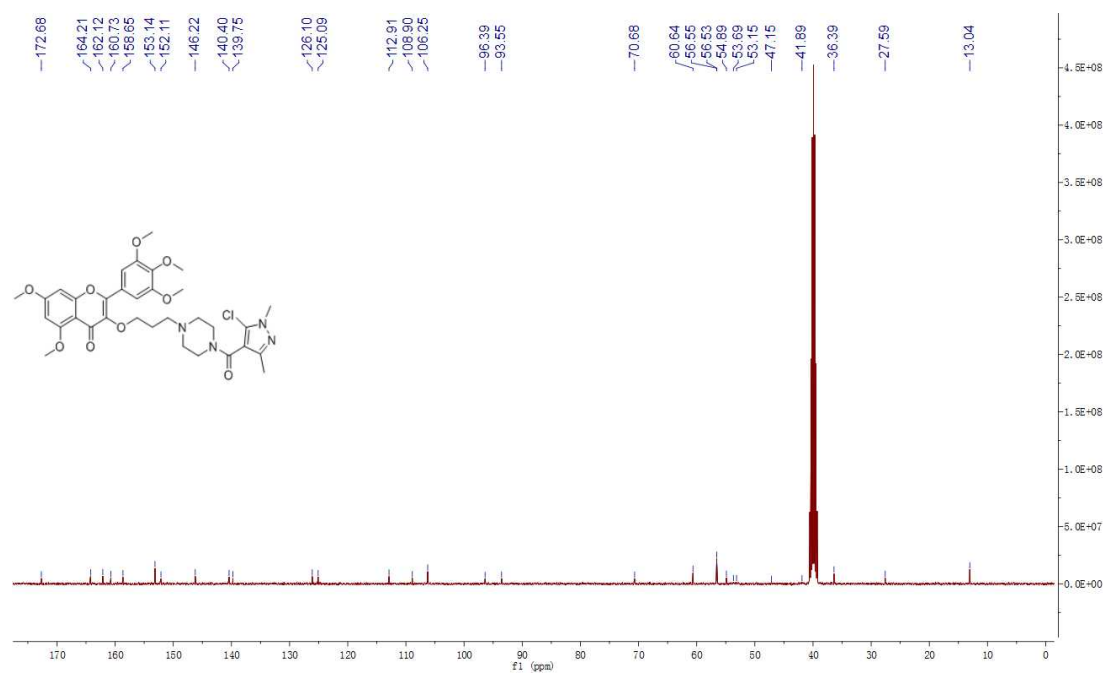

**Figure S59**  $^{13}\text{C}$  NMR spectrum of title compound **D10**

D10 #47 RT: 0.48 AV: 1 NL: 2.11E+007  
T: FTMS + p ESI Full ms [150.0000-2200.0000]

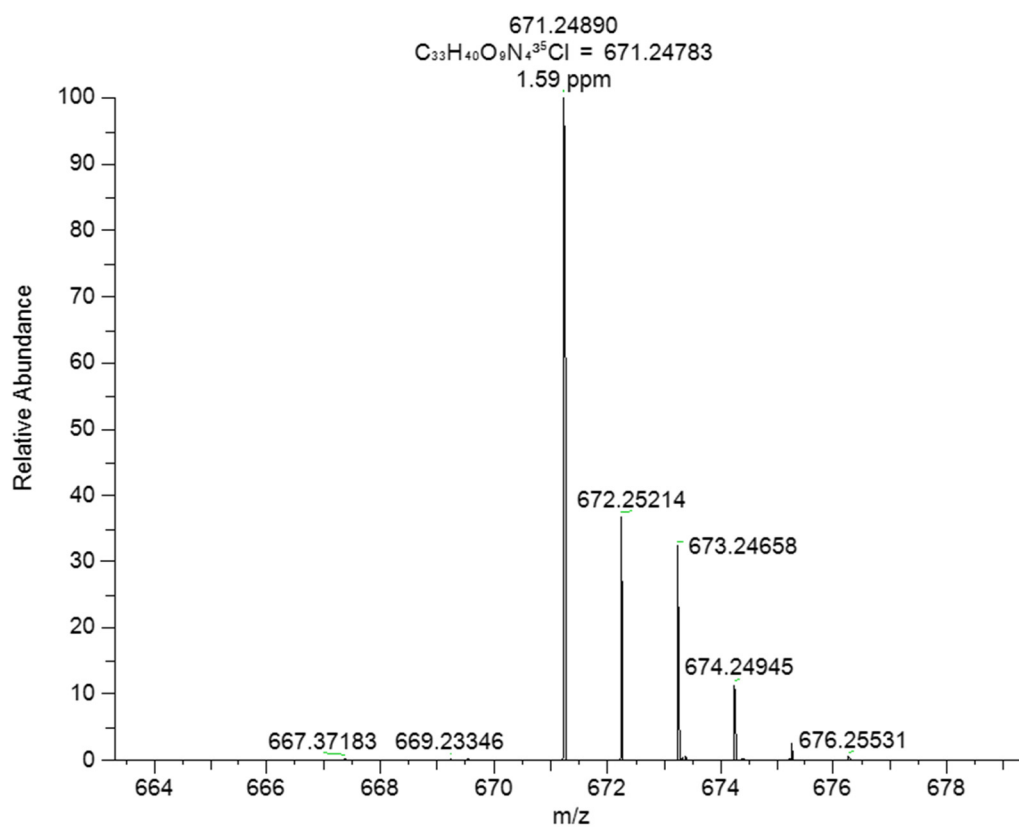

**Figure S60** HRMS spectrum of title compound **D10**

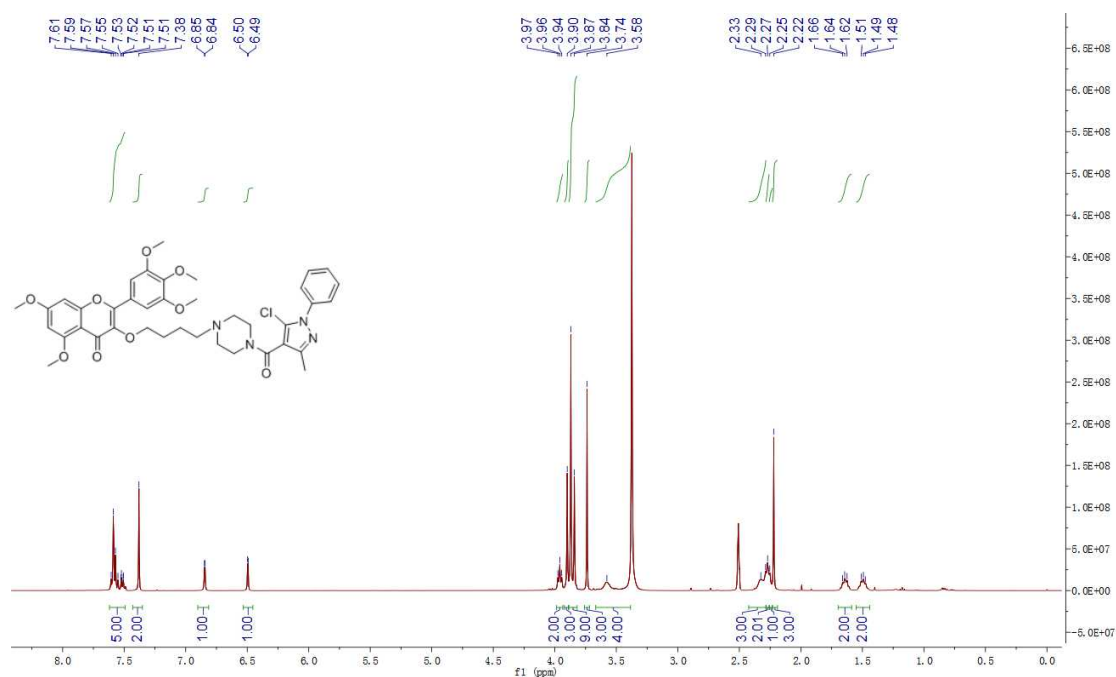

**Figure S61** <sup>1</sup>H NMR spectrum of title compound D11

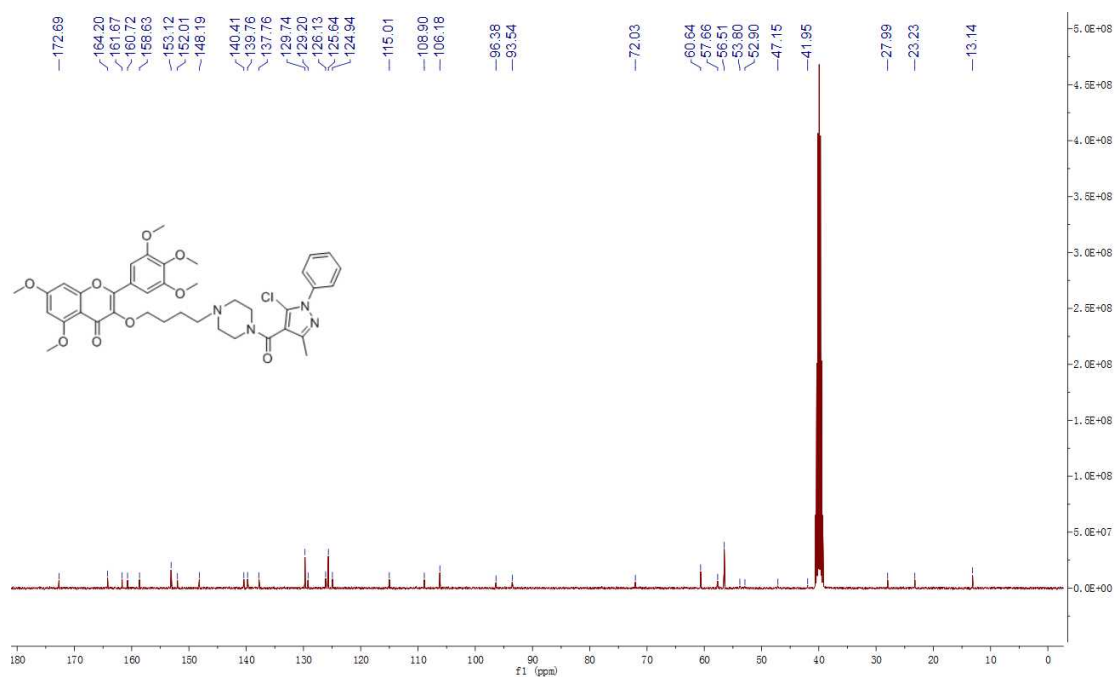

**Figure S62** <sup>13</sup>C NMR spectrum of title compound D11

D11 #51 RT: 0.52 AV: 1 NL: 9.04E+007  
T: FTMS + p ESI Full ms [150.0000-2200.0000]

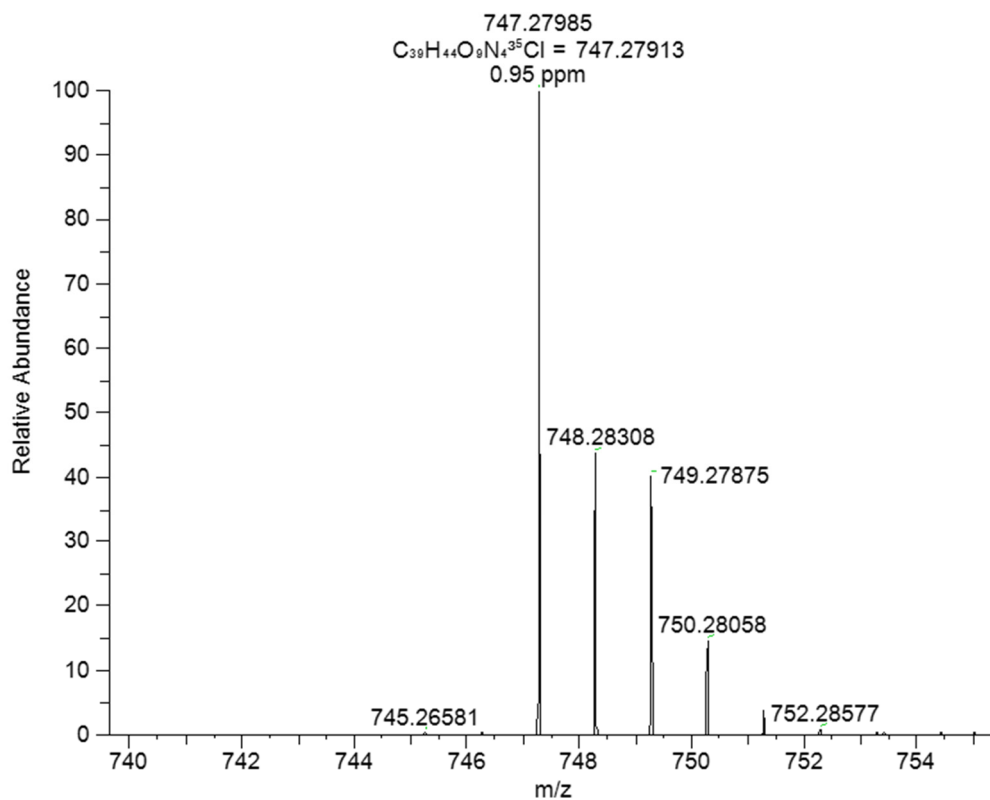

Figure S63 HRMS spectrum of title compound D11

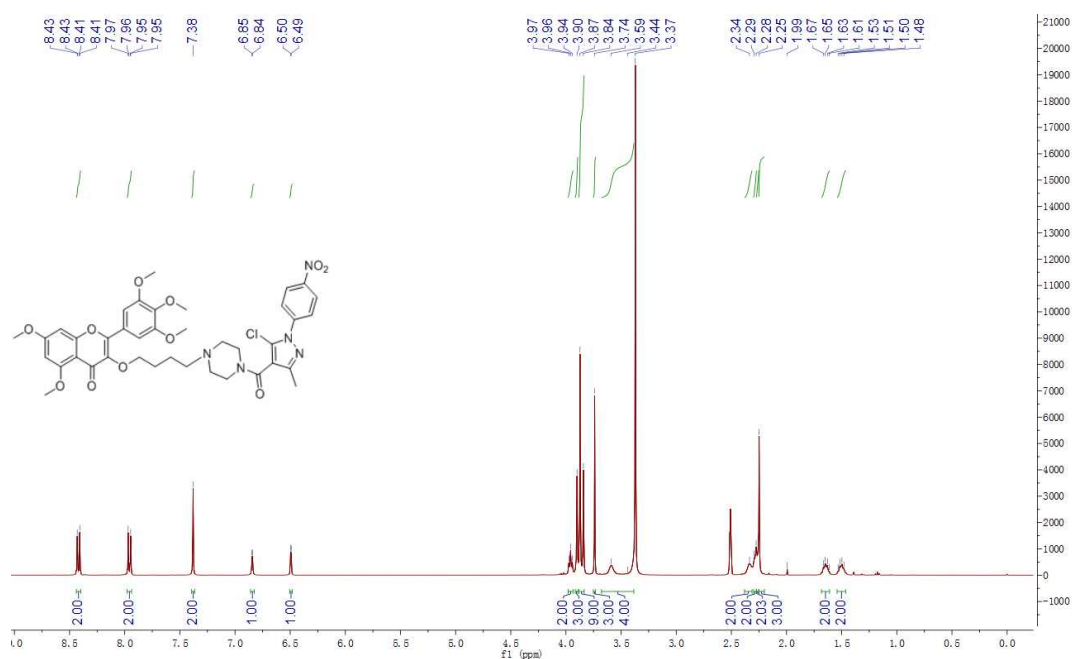

Figure S64 <sup>1</sup>H NMR spectrum of title compound D12

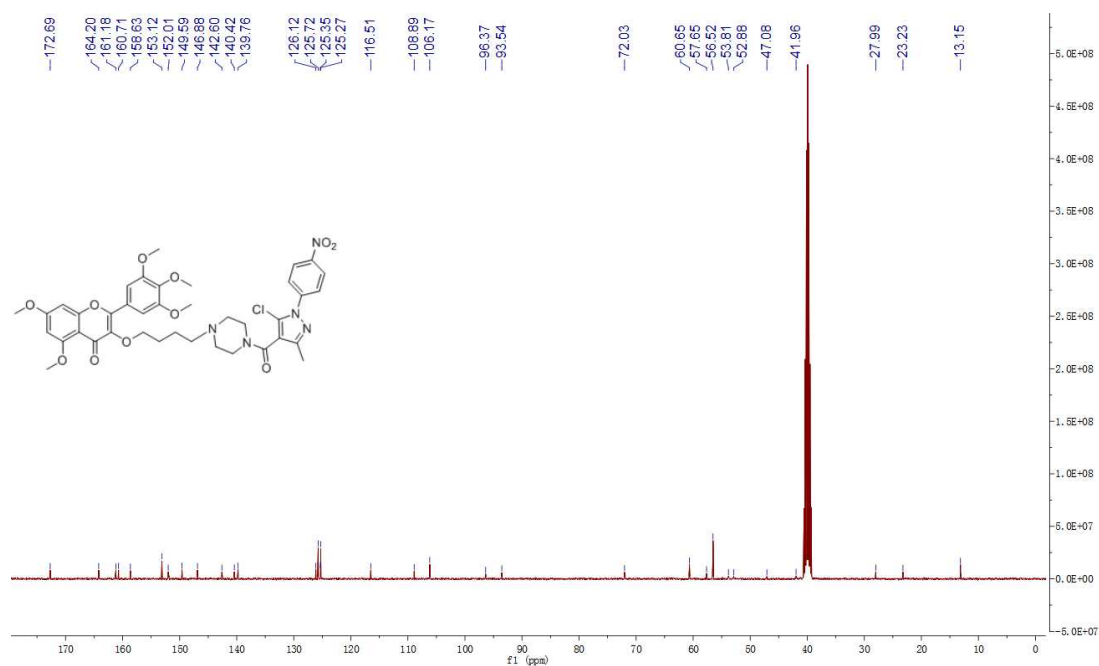

**Figure S65**  $^{13}\text{C}$  NMR spectrum of title compound **D12**

101\_230330123529 #39 RT: 0.39 AV: 1 NL: 1.40E+008  
T: FTMS + p ESI Full ms [100.0000-1300.0000]

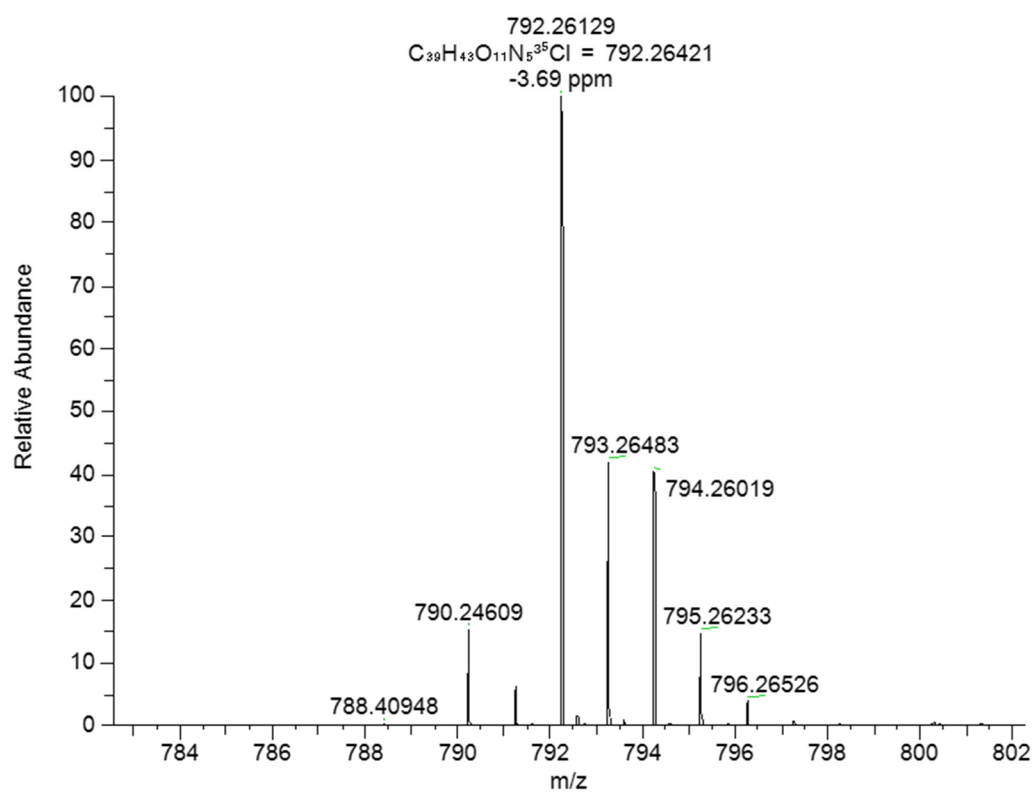

**Figure S66** HRMS spectrum of title compound **D12**

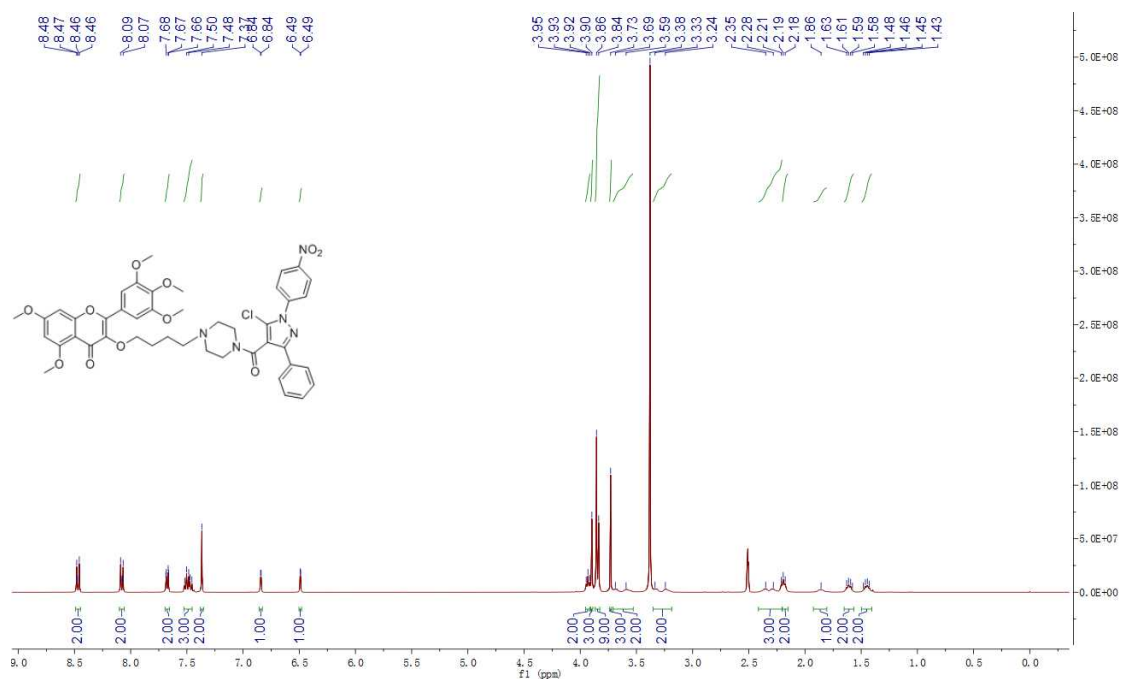

**Figure S67**  $^1\text{H}$  NMR spectrum of title compound D13

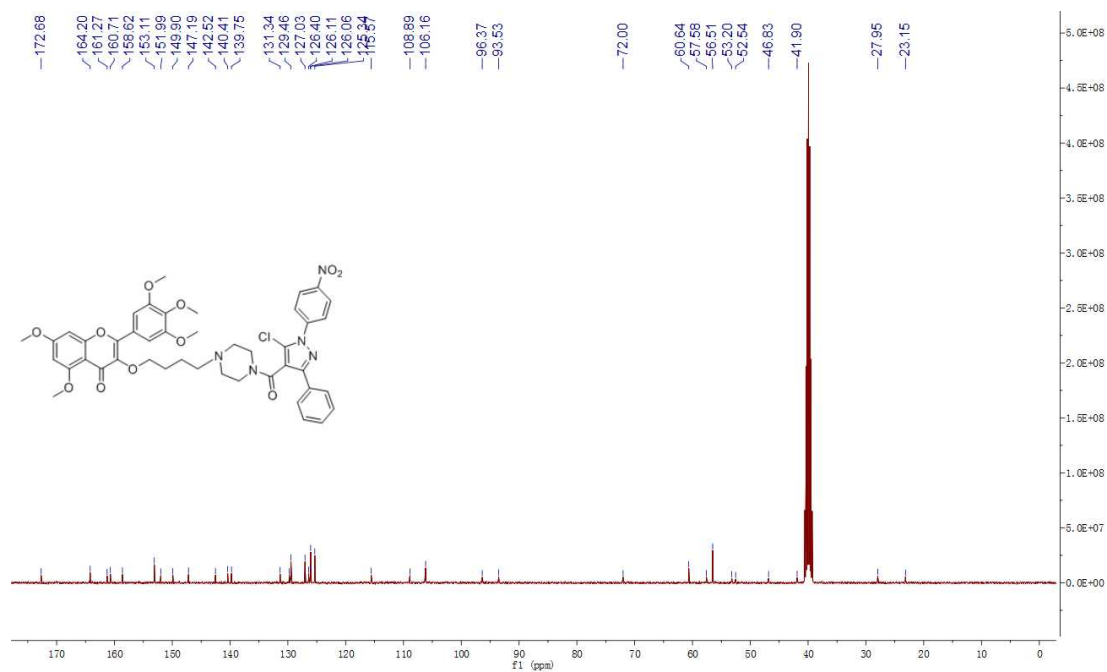

**Figure S68**  $^{13}\text{C}$  NMR spectrum of title compound D13

D13 #9 RT: 0.10 AV: 1 NL: 4.93E+004  
T: FTMS + p ESI Full ms [100.0000-1300.0000]

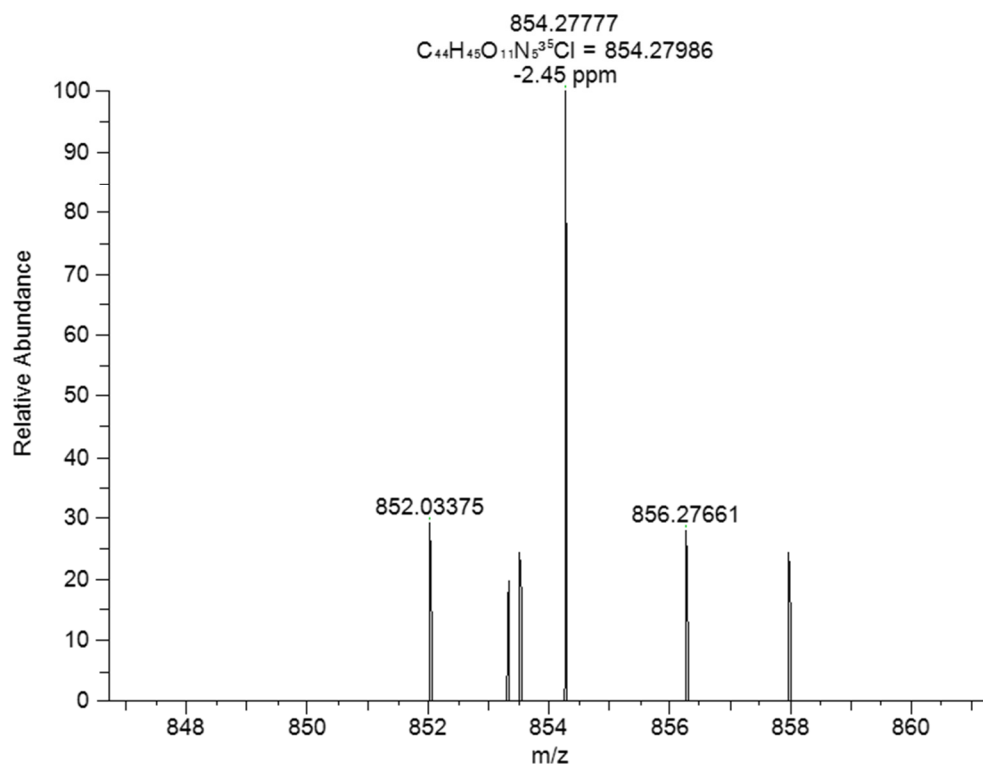

Figure S69 HRMS spectrum of title compound D13

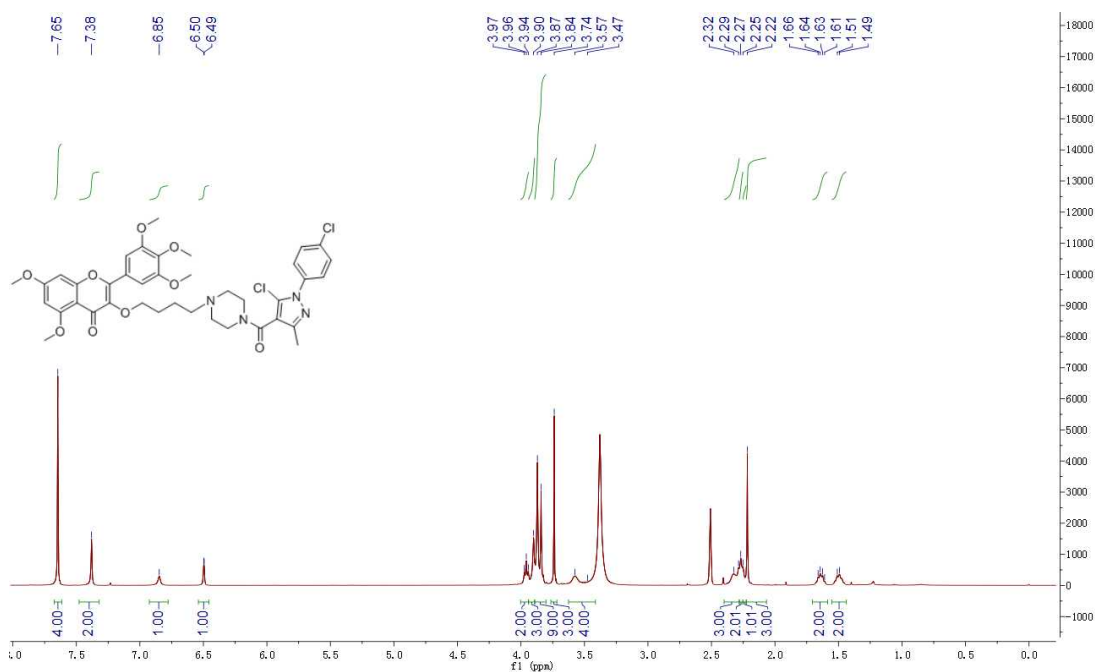

Figure S70  $^1H$  NMR spectrum of title compound D14

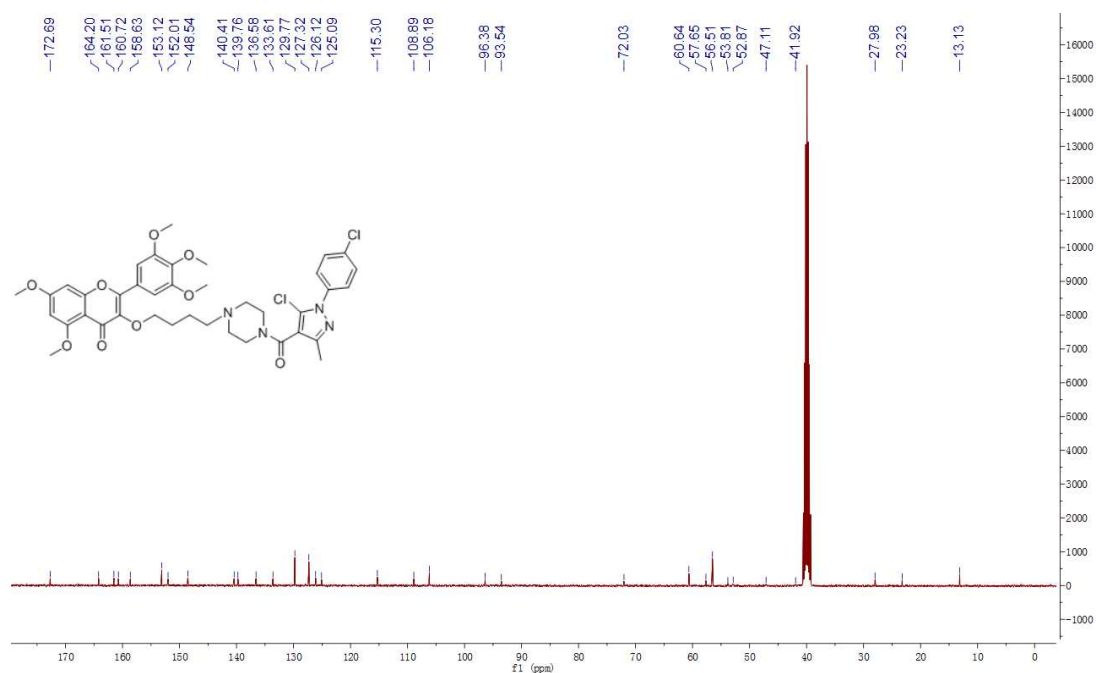

**Figure S71**  $^{13}\text{C}$  NMR spectrum of title compound D14

D15 #55 RT: 0.53 AV: 1 NL: 4.28E+007  
T: FTMS + p ESI Full ms [100.0000-1300.0000]

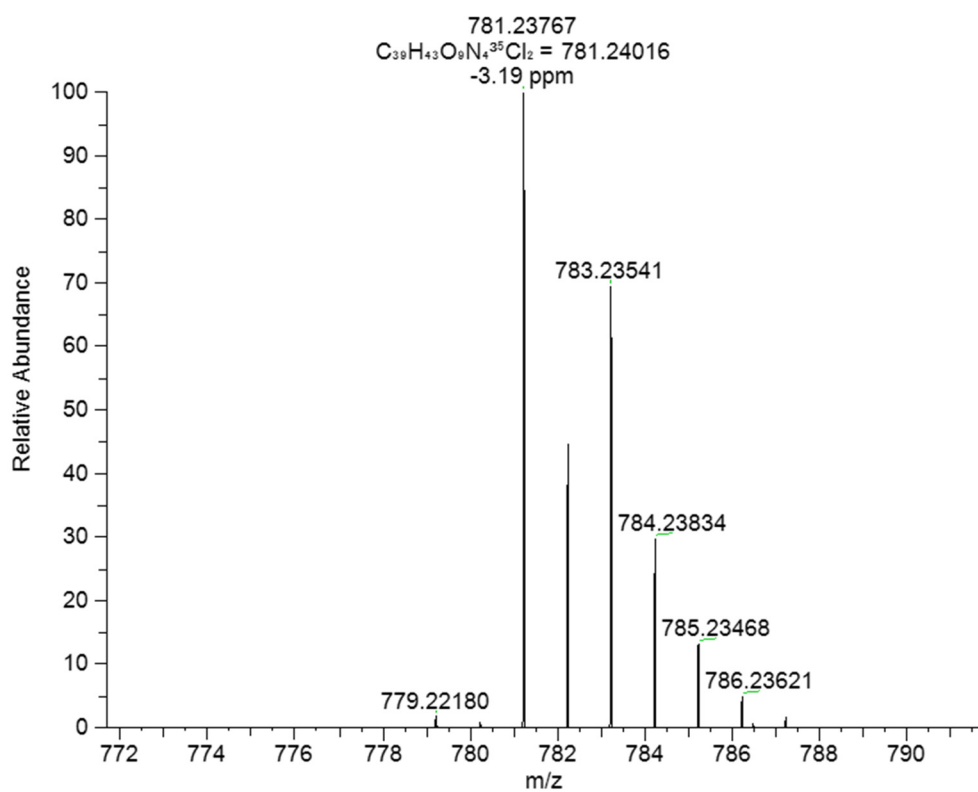

**Figure S72** HRMS spectrum of title compound D14

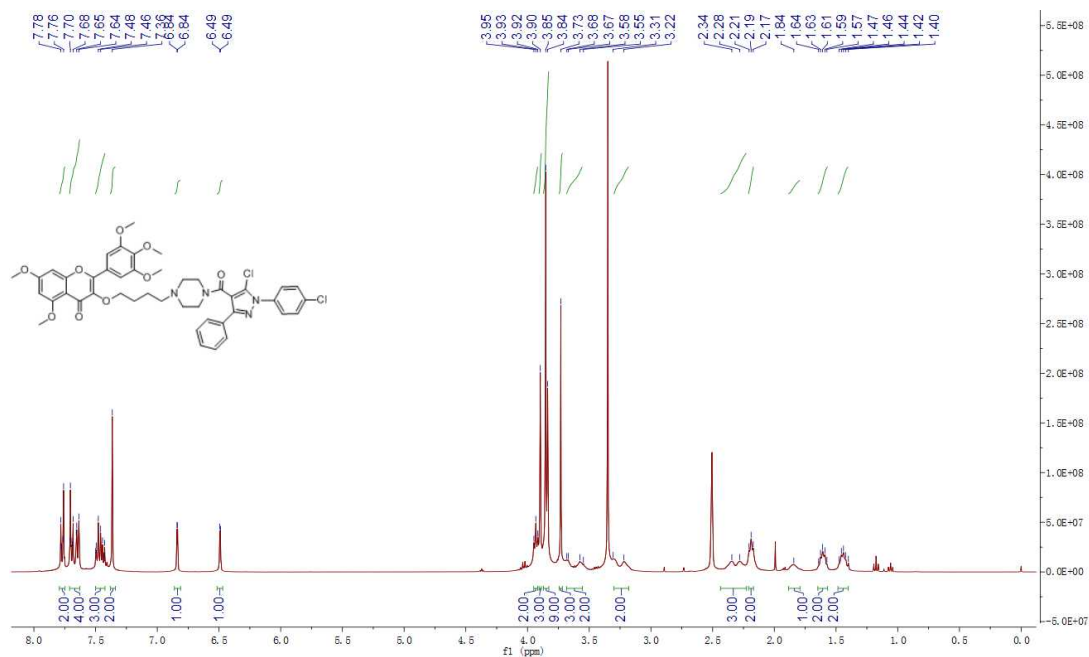

**Figure S73**  $^1\text{H}$  NMR spectrum of title compound D15

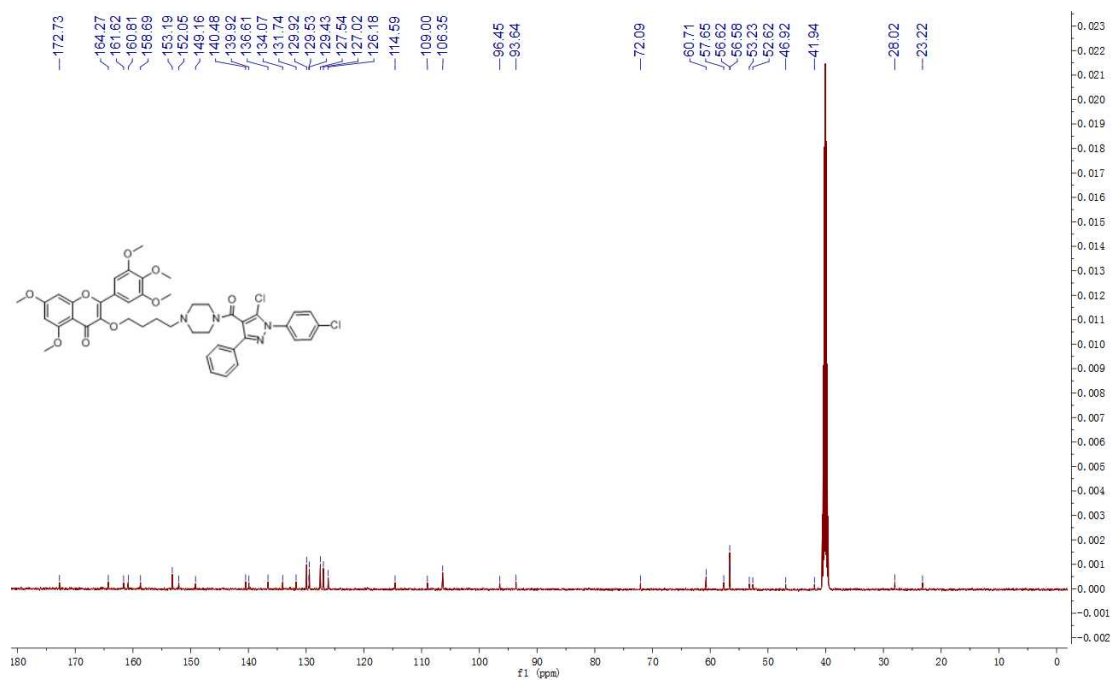

**Figure S74**  $^{13}\text{C}$  NMR spectrum of title compound D15



Mass spectrum of compound 10. The x-axis represents the mass-to-charge ratio ( $m/z$ ) and the y-axis represents the relative abundance. The base peak is at  $m/z$  843.25671. Other labeled peaks include  $m/z$  839.76459, 841.67194, 845.25500, and 846.25745. The chemical formula  $C_{44}H_{45}O_9N_4^{35}Cl_2$  and a value of 1.07 ppm are also shown.

Chemical structure of compound 10: COc1cc(OC)c2c(c1)oc(=O)c3cc(OC)c(OC)c3OCCCN2C4=CC=CC=C4N5C(=O)C=C(C)N5Cl

<sup>1</sup>H NMR spectrum (CDCl<sub>3</sub>) of compound 10. The x-axis represents the chemical shift in ppm (δ), ranging from 0.0 to 9.0. The y-axis represents the intensity, ranging from -5.0E+07 to 5.0E+08. Integration values are shown below the baseline. A list of peak chemical shifts (δ) is provided at the top, and a list of peak intensities is shown on the right.

Chemical shifts (δ) at the top: 8.58, 8.58, 8.57, 8.57, 8.06, 8.04, 7.76, 7.74, 7.52, 7.52, 6.84, 6.84, 6.83, 6.50, 6.49, 6.48, 3.97, 3.96, 3.96, 3.90, 3.87, 3.84, 3.74, 3.59, 3.30, 2.33, 2.30, 2.28, 2.27, 2.25, 2.23, 1.66, 1.64, 1.61, 1.52, 1.40, 1.39, 1.47.

Integration values below the baseline: 1.00, 1.00, 1.00, 2.00, 1.00, 1.00, 2.00, 2.00, 9.00, 3.00, 2.03, 6.00, 3.00, 2.00, 2.00.

Peak intensities on the right: 5.0E+08, 5.0E+08, 4.5E+08, 4.0E+08, 3.5E+08, 3.0E+08, 2.5E+08, 2.0E+08, 1.5E+08, 1.0E+08, 5.0E+07, 0.0E+00, -5.0E+07.

S45

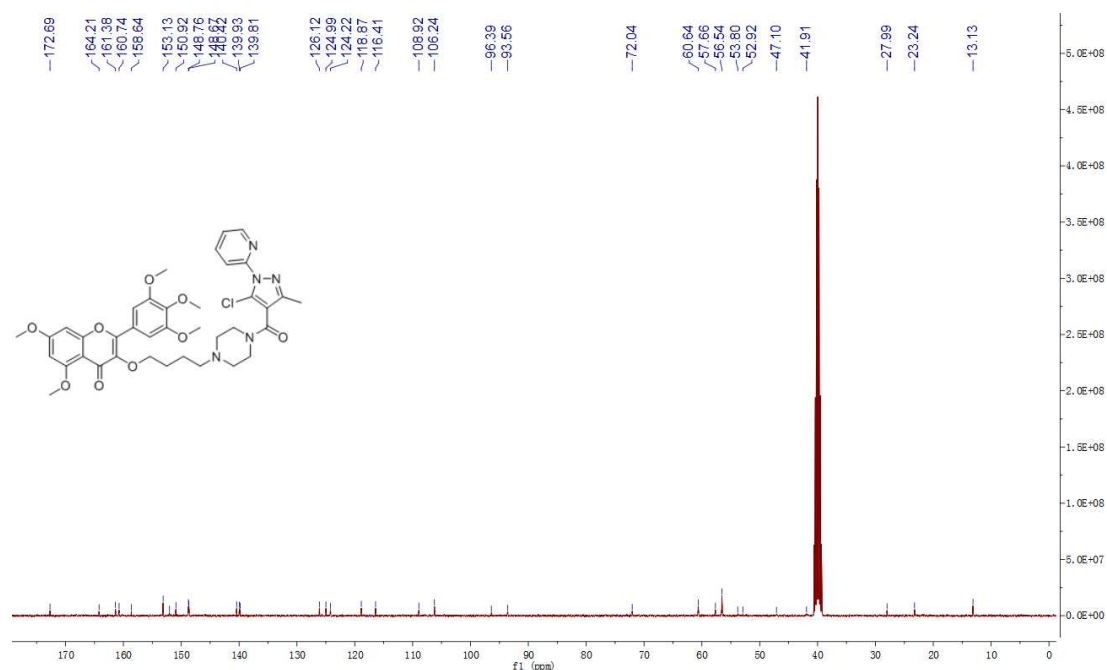

**Figure S77**  $^{13}\text{C}$  NMR spectrum of title compound **D16**

D17 #39 RT: 0.37 AV: 1 NL: 2.32E+007  
T: FTMS + p ESI Full ms [100.0000-1300.0000]

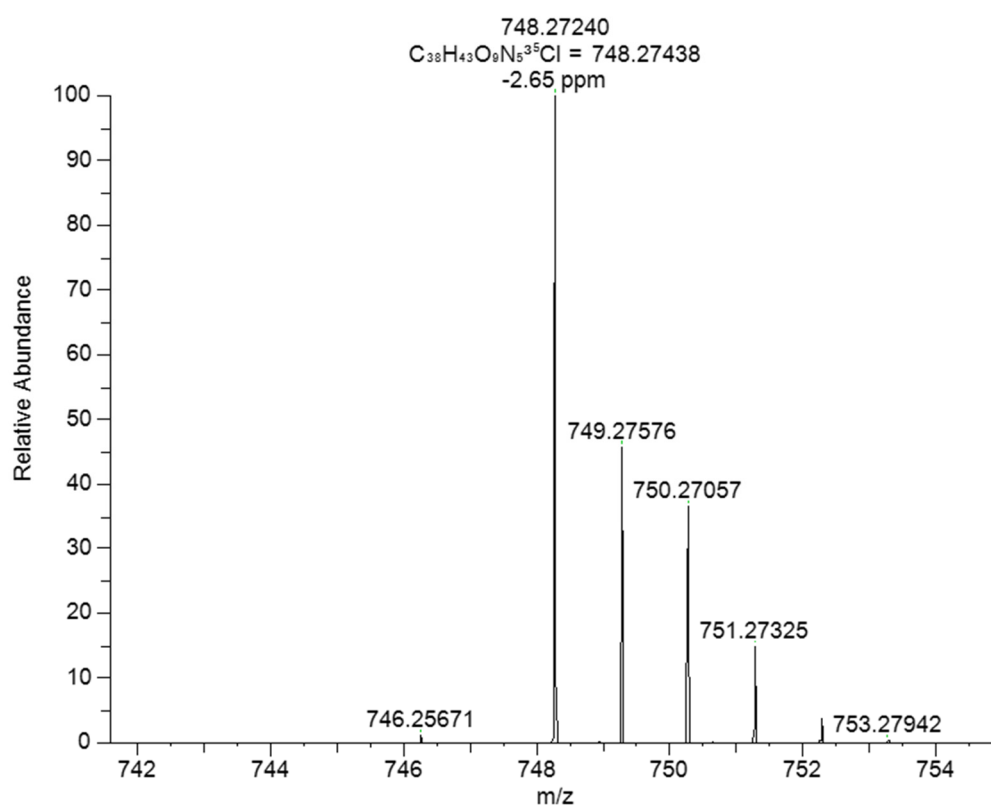

**Figure S78** HRMS spectrum of title compound **D16**

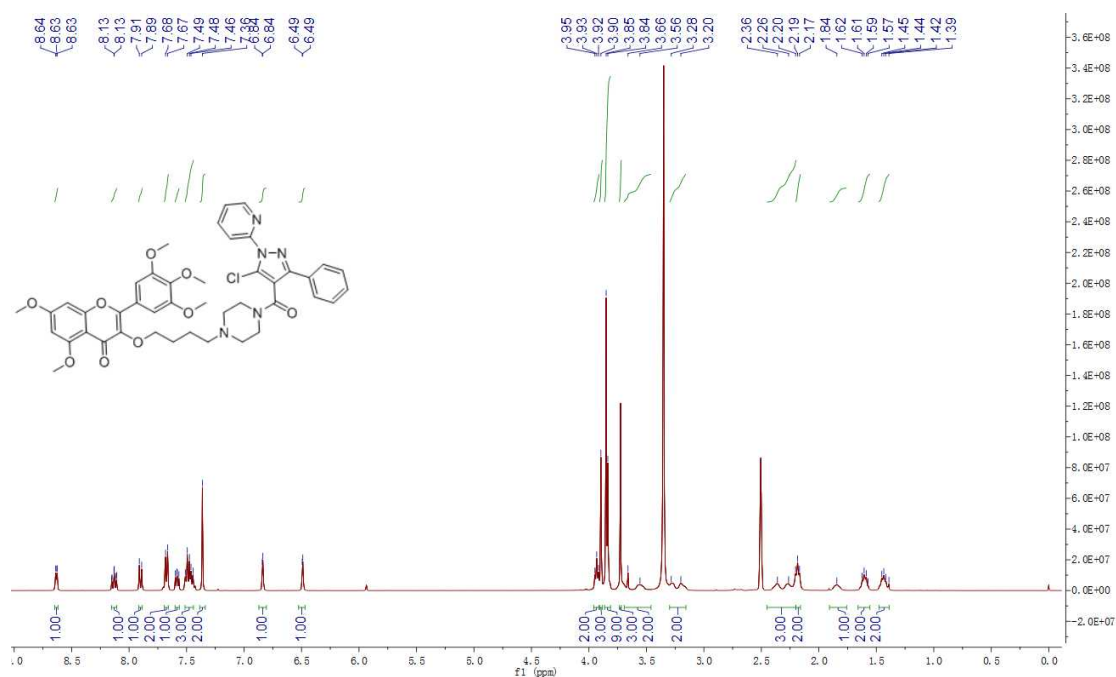

**Figure S79**  $^1\text{H}$  NMR spectrum of title compound D17

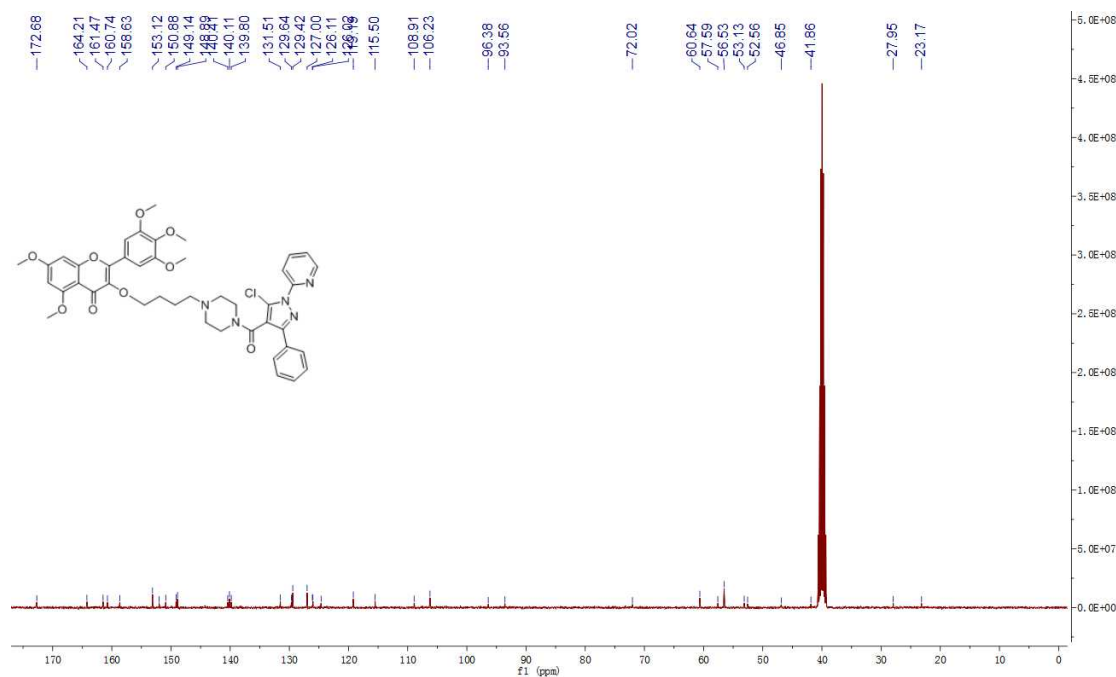

**Figure S80**  $^{13}\text{C}$  NMR spectrum of title compound D17

D18 #49 RT: 0.47 AV: 1 NL: 9.31E+007  
T: FTMS + p ESI Full ms [100.0000-1300.0000]

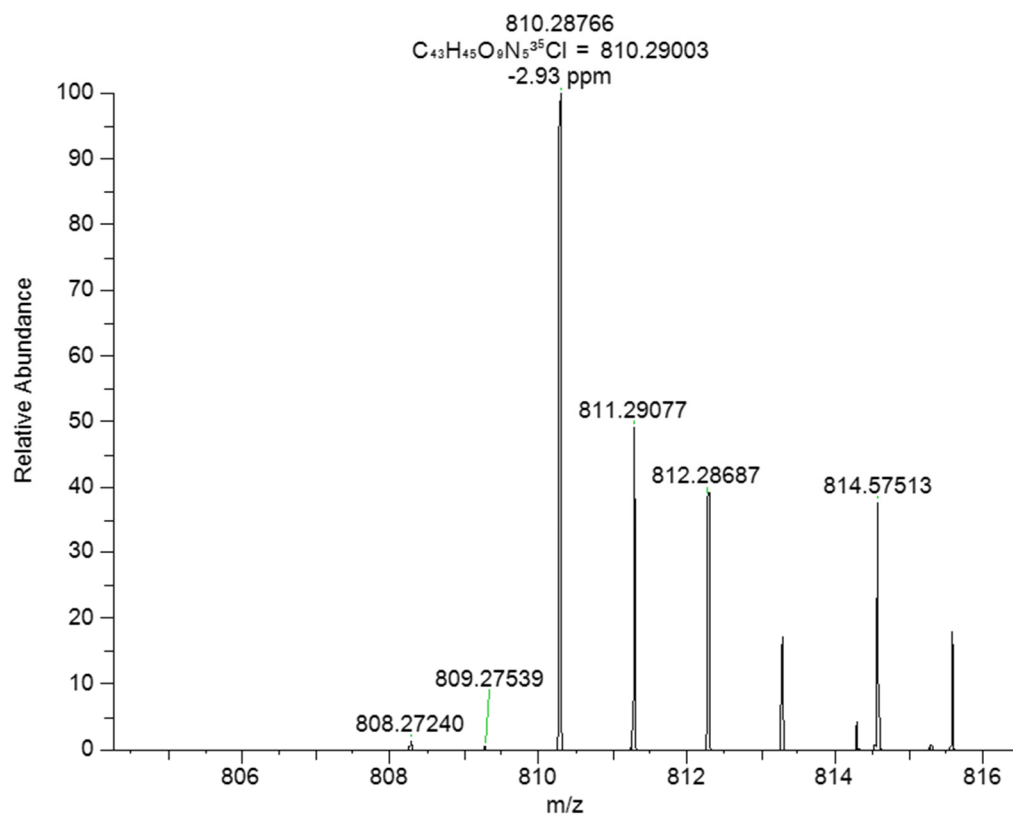

Figure S81 HRMS spectrum of title compound D17

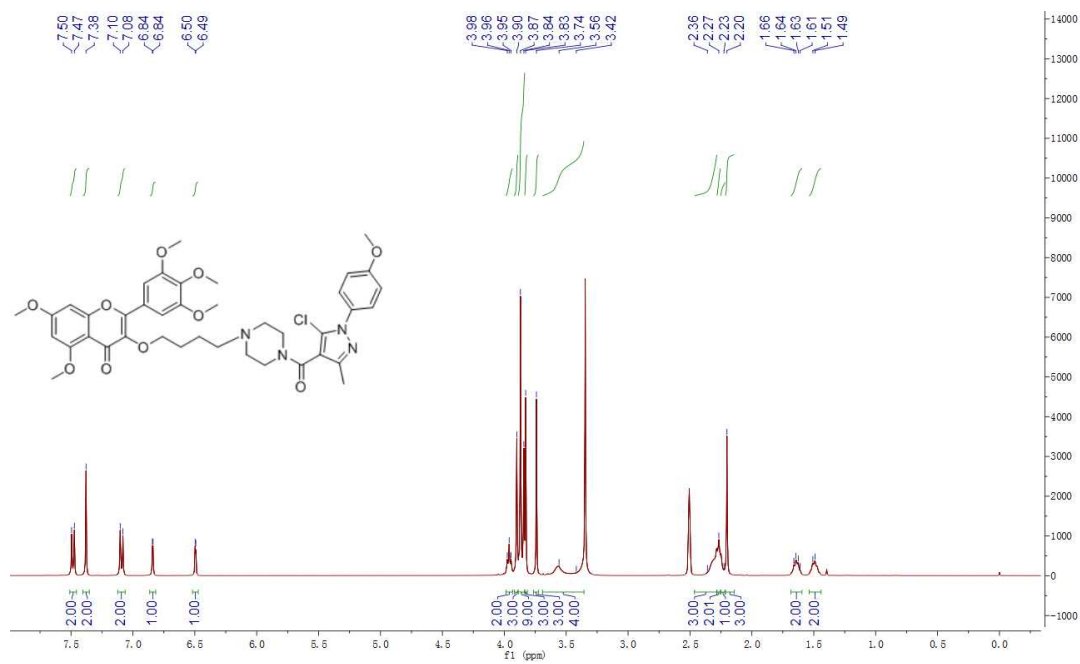

Figure S82  $^1H$  NMR spectrum of title compound D18

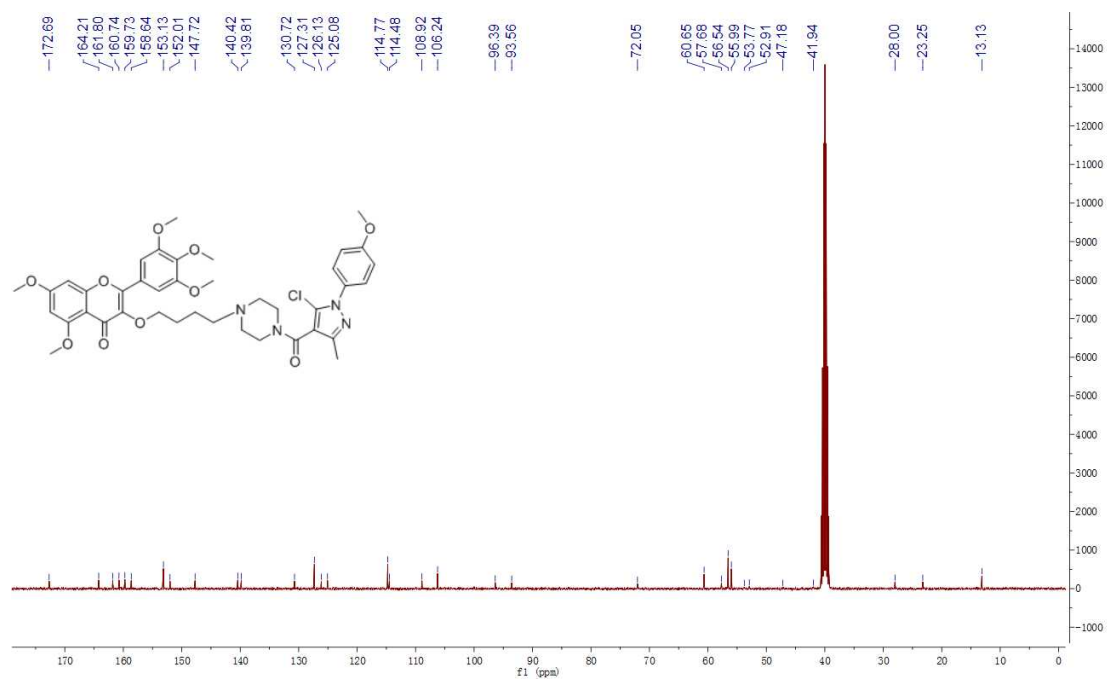

**Figure S83**  $^{13}\text{C}$  NMR spectrum of title compound **D18**

D19 #47 RT: 0.45 AV: 1 NL: 1.26E+008  
T: FTMS + p ESI Full ms [100.0000-1300.0000]

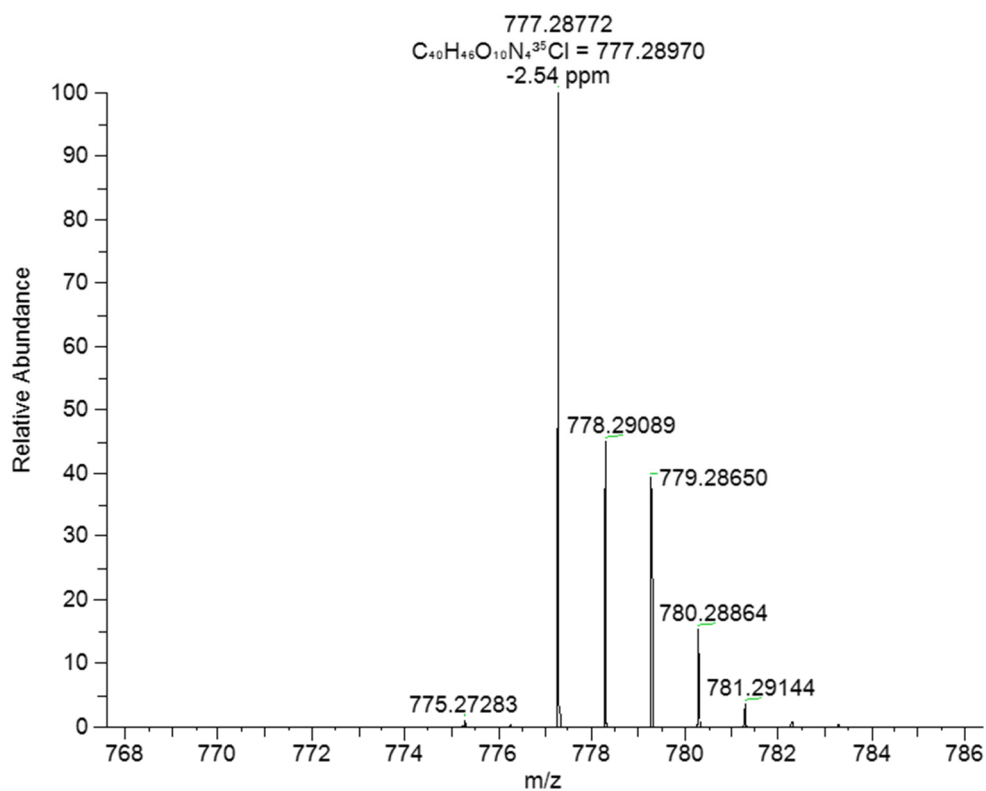

**Figure S84** HRMS spectrum of title compound **D18**

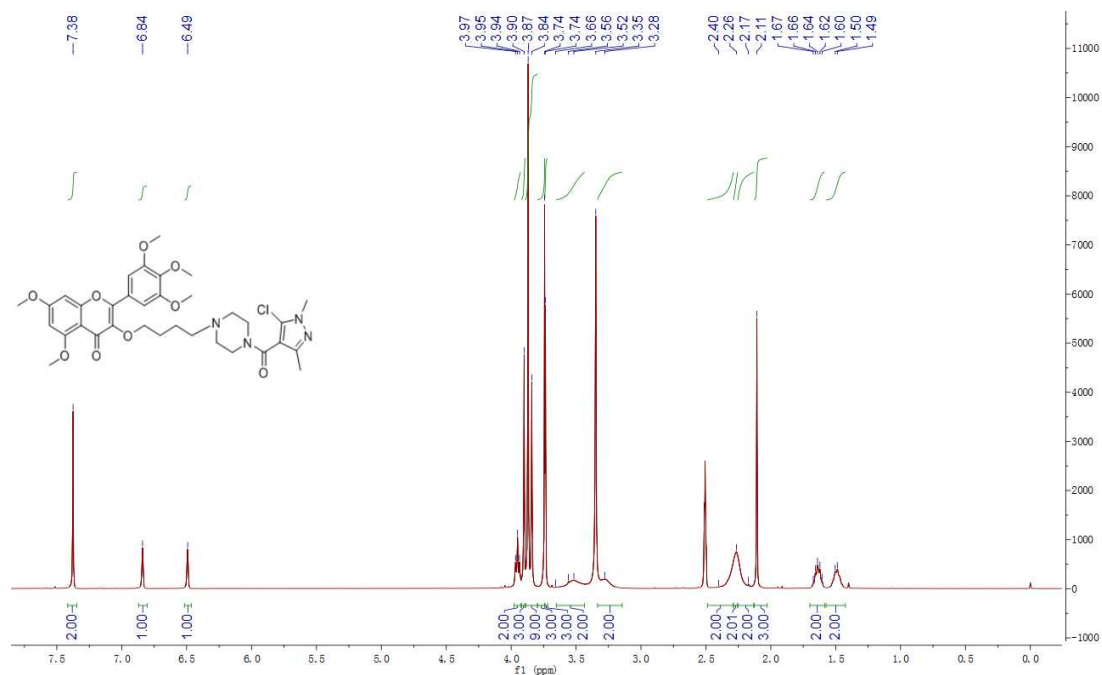

**Figure S85** <sup>1</sup>H NMR spectrum of title compound D19

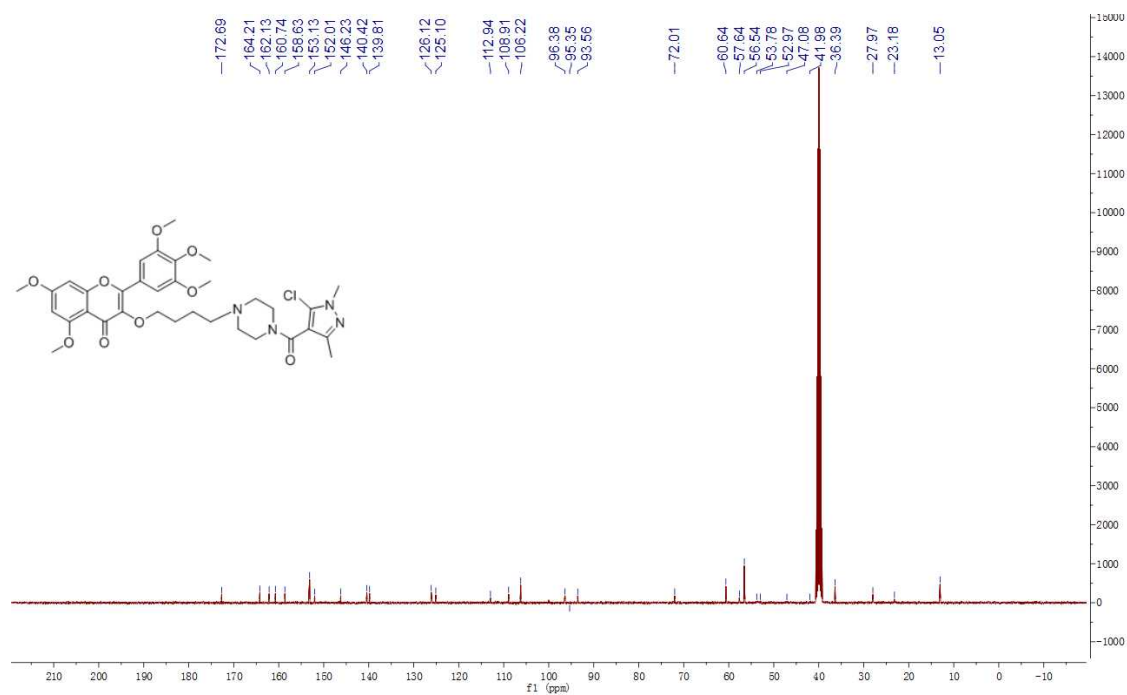

**Figure S86** <sup>13</sup>C NMR spectrum of title compound D19

D20 #51 RT: 0.52 AV: 1 NL: 1.00E+008  
T: FTMS + p ESI Full ms [150.0000-2200.0000]

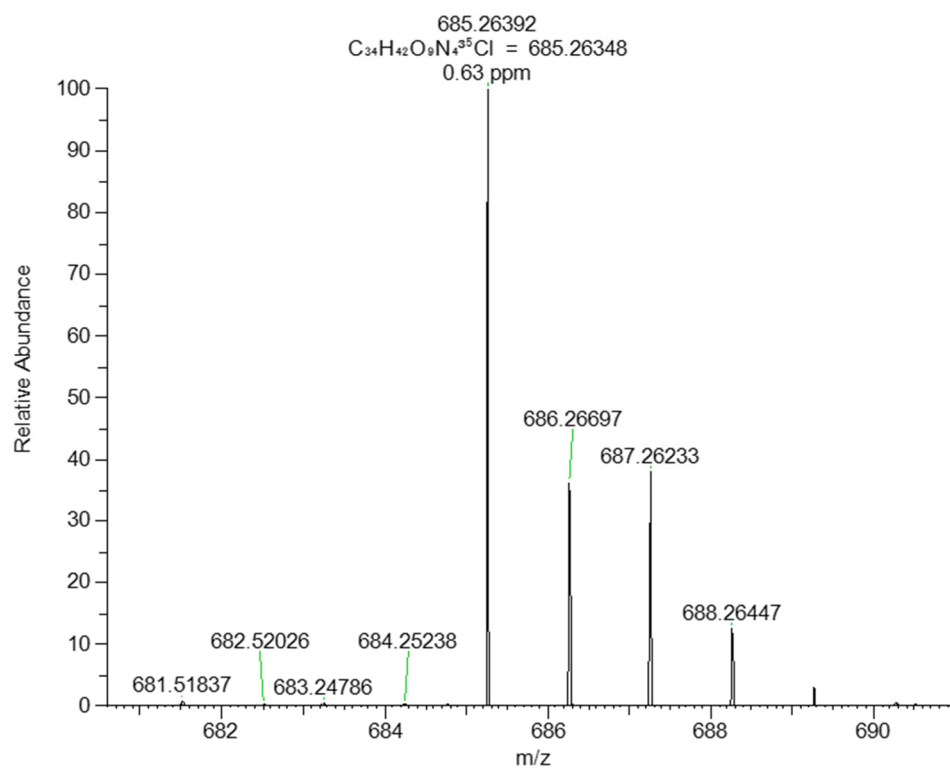

**Figure S87** HRMS spectrum of title compound **D19**
